# Supplementary material for: Building up the “Genome” of bi-atom catalysts toward efficient HER/OER/ORR
Source: Royal Society of Chemistry journal article supplement (doi:10.1039/d2ta02050e), 2022-01-01
Supplement: d2ta02050e1.pdf [file d2ta02050e1.pdf]

## Supporting Information

### Building Up “Genome” of Bi-atom Catalysts toward the Efficient HER/OER/ORR

Lihong Zhang<sup>1</sup>, Xiangyu Guo<sup>2,3\*</sup>, Shengli Zhang<sup>4\*</sup>, Shiping Huang<sup>1\*</sup>

<sup>1</sup> State Key Laboratory of Organic-Inorganic Composites, Beijing University of Chemical Technology, Beijing, 100029, China

<sup>2</sup> Shenzhen JL Computational Science and Applied Research Institute, Shenzhen 518110 China

<sup>3</sup> Beijing Computational Science Research Center (CSRC), Beijing 100193 China

<sup>4</sup> MIIT Key Laboratory of Advanced Display Materials and Devices, Ministry of Industry and Information Technology, Institute of Optoelectronics & Nanomaterials, Nanjing University of Science and Technology, Nanjing, 210094, China

#### Corresponding E-mails:

E-mail: [xiangyuguochem@gmail.com](mailto:xiangyuguochem@gmail.com)

E-mail: [zhangslvip@njust.edu.cn](mailto:zhangslvip@njust.edu.cn)

E-mail: [huangsp@mail.buct.edu.cn](mailto:huangsp@mail.buct.edu.cn)

## DFT-D3 method

Since GGA correlation functionals do not account for long-range correlations, the DFT-D method proposed by Grimme<sup>1</sup> is widely used to solve the dispersion problem of DFT. Compared with the DFT-D1 and DFT-D2, the DFT-D3 takes the number of neighbors in the atomic environment into account, and further enhancing the accuracy of the results. Patel et al.<sup>2</sup> applied the DFT-D3 to all hybrid and GGA functional calculations, and found that the PBE-D3 can better describe the vdW interactions. Moreover, some literatures<sup>3,4</sup> have performed comparisons between DFT-D3 correction and experiments, and validate the reliability of DFT-D3.

## Gibbs free energy computations

With regard to HER, the overall reaction scheme can be described as follows<sup>5</sup>:

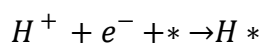

(S1)

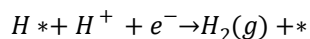

(S2)

where \* denotes the active site, and (g) denotes the gas phases. Under standard conditions (pH = 0, U = 0 V vs standard hydrogen electrode (SHE)), the Gibbs free energy change for hydrogen adsorption ( $\Delta G_{H^*}$ ) can be calculated by:

$$\Delta G_{H^*} = \Delta E_{H^*} + \Delta E_{ZPE} - T\Delta S_H \quad (S3)$$

where  $\Delta E_{H^*}$  stands for the hydrogen adsorption energy.  $\Delta E_{ZPE}$  and  $\Delta S_H$  are the zero-point energy and entropy differences between gas phase and adsorbed state for hydrogen, respectively.  $T$  represents a temperature of 298.15 K herein.

The OER proceeds via four elementary reaction steps as follows<sup>6</sup>:

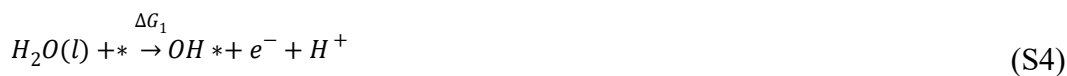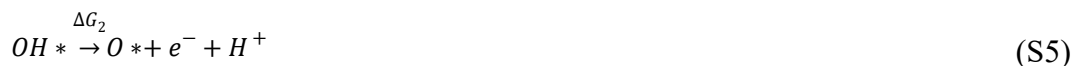

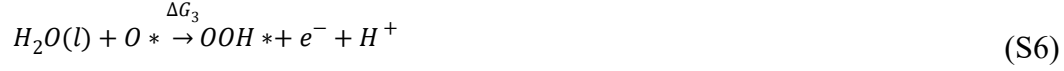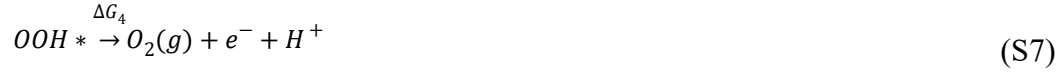

where (l) represents the liquid phases. Moreover, OH\*, O\*, and OOH\* stand for the oxygenated intermediates.

The ORR can be treated as the inverse of ORR, and proceeds according following four elementary reaction steps<sup>7</sup>:

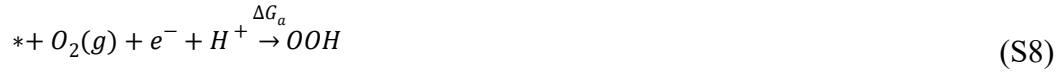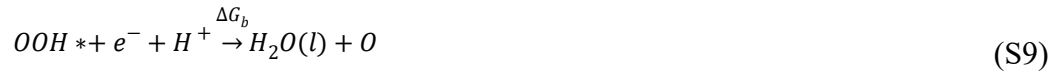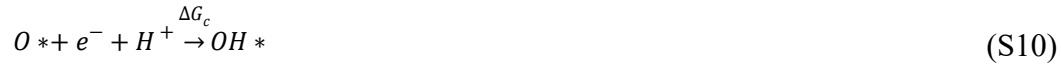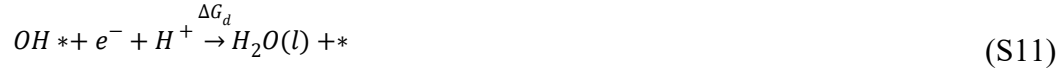

The Gibbs free energy change ( $\Delta G$ ) for the elementary steps can be calculated as follows:

$$\Delta G = \Delta E + \Delta ZPE - T\Delta S + \Delta G_U + \Delta G_{pH} + G_{solv} \quad (S12)$$

where  $\Delta E$ ,  $\Delta ZPE$ , and  $\Delta S$  stand for the energy difference in adsorption energy, zero-point energy, and entropy between the product and reactant of each elemental step, respectively.  $\Delta G_U = -eU$ , of which  $U$  is the applied electrode potential, and  $e$  stands for the number of transferred electrons.  $\Delta G_{pH} = -k_B T \ln 10 \text{ pH}$ , of which  $k_B$  means the Boltzmann constant. The ZPE and TS can be defined as follows:

$$ZPE = \frac{1}{2} \sum_i \hbar \nu_i \quad (S13)$$

$$-TS = k_B T \sum_i \ln(1 - e^{-\hbar \nu_i / k_B T}) - \sum_i \hbar \nu_i \left( \frac{1}{e^{\hbar \nu_i / k_B T} - 1} \right) \quad (S14)$$

where  $\nu_i$  is the vibration frequency of the  $i$ th vibrational mode, and  $h$  is Planck's constant. The ZPE and TS of the reaction intermediates can be obtained from the vibration analysis using the VASPKIT code<sup>8</sup>. The ZPE and TS are calculated for the adsorbates only, as the contribution of the surface to the ZPE and entropy remains

almost constant under different adsorbed intermediates<sup>9,10</sup>. Moreover,  $G_{solv}$  means a solvation correction to the reaction intermediates, which was estimated to be 0.30 eV.<sup>11</sup> The correction accounts for the solvation of the OOH\* and OH\* by the solution surrounding the metal site. The reason for this correction is the following: the enthalpy difference between the gas and liquid phases of H<sub>2</sub>O is ~0.45 eV at 298.15 K and 0.035 bar, but their free energies are identical. This principle behind this phenomenon can be ascribed to the presence of hydrogen bonds in the liquid phase, in which each H<sub>2</sub>O creates three hydrogen bonds (include two donors and one acceptor) with adjacent molecules. Since OH\* is able to create two hydrogen bonds, it will be stabilized by ~0.3 eV when solvated, and we expected OOH\* to be stabilized in the same order of magnitude due to solvation effects.<sup>12</sup>

Generally, pH effects on electrochemical systems can be divided into three aspects<sup>13</sup>: i) change in the proton donor or acceptor with the electrolyte pH, ii) affect adsorbate dipolefiled interactions, and iii) induce solution-phase reactions. Since the solvation-induced adsorption free energy change is primarily associated with the formation of H-bonds with H<sub>2</sub>O under the aqueous environment, and contribution of H-bonds might not be changed significantly with the variations of pH values. To this end, we did not consider more details about the pH effect just as many literatures<sup>14-16</sup> in terms of electrochemical catalysis in acidic conditions.

The overpotential ( $\eta$ ) is adopted to evaluate the OER and ORR performance according to following equations:

$$\eta^{OER} = \max\{\Delta G_1, \Delta G_2, \Delta G_3, \Delta G_4\}/e - 1.23 \quad (S15)$$

$$\eta^{ORR} = \max\{\Delta G_a, \Delta G_b, \Delta G_c, \Delta G_d\}/e + 1.23 \quad (S16)$$

### **Kinetic computations**

The transition states (TS) are calculated by employing the climbing-image nudged elastic band (CI-NEB) method.<sup>17</sup> There are eight images between the initial state (IS) and final state (FS).

The Pt calculations are carried on a 3×3 two layers FCC(111) slab separated by

three equivalent layers of vacuum. The bottom three layers are fixed, and the top two layers are allowed to relax.

**Table S1.** The energies ( $E$ ) and bond lengths for M-M and M-N in  $M_2/g\text{-CN}$  (M=Sc, Ti, V, Cr, Mn, Fe, Co, Ni, Cu, Zn, Y, Zr, Nb, Mo, Ru, Rh, Pd, Ag, Hf, Ta, W, Re, Os, Ir, Pt, Au).

| M  | $E$ (eV)     |               | The bond lengths (Å) |       |       |       |
|----|--------------|---------------|----------------------|-------|-------|-------|
|    | M-2N         | M-3N          | M-M                  | M-N1  | M-N2  | M-N3  |
| Sc | -            | -421.0724599  | 2.224                | 2.179 | 2.009 | 2.168 |
| Ti | -            | -424.5841186  | 1.975                | 2.187 | 2.031 | 2.148 |
| V  | -            | -426.4234747  | 1.830                | 2.174 | 2.061 | 2.122 |
| Cr | -            | -425.8382477  | 2.078                | 2.098 | 2.007 | 2.071 |
| Mn | -            | -425.405069   | 2.395                | 2.056 | 1.906 | 2.005 |
| Fe | -            | -423.5734277  | 2.191                | 2.064 | 1.982 | 2.022 |
| Co | -            | -420.979397   | 2.253                | 2.032 | 1.935 | 1.998 |
| Ni | -            | -418.865846   | 2.403                | 2.011 | 1.888 | 1.978 |
| Cu | -            | -414.6877747  | 2.379                | 2.070 | 1.968 | 2.051 |
| Zn | -410.6453237 | -             | 2.243                | 2.069 | 2.031 | -     |
| Y  | -            | -423.5839285  | 3.095                | 2.435 | 2.147 | 2.365 |
| Zr | -            | -424.1222809  | 2.225                | 2.200 | 2.047 | 2.174 |
| Nb | -            | -427.8507333  | 2.060                | 2.183 | 2.063 | 2.146 |
| Mo | -            | -428.2043986  | 2.129                | 2.165 | 2.127 | 2.127 |
| Ru | -424.1746241 | -             | 2.193                | -     | 1.988 | 1.950 |
| Rh | -            | -421.1317353  | 2.316                | 1.959 | 1.941 | 2.240 |
| Pd | -            | -417.7710435  | 2.407                | 2.077 | 1.979 | 2.055 |
| Ag | -            | -411.546058   | 2.633                | 2.406 | 2.234 | 2.420 |
| Hf | -            | -426.05604263 | 2.313                | 2.155 | 2.005 | 2.135 |

|    |   |              |       |       |       |       |
|----|---|--------------|-------|-------|-------|-------|
| Ta | - | -429.3836541 | 2.157 | 2.156 | 2.023 | 2.123 |
| W  | - | -431.2287911 | 2.271 | 2.128 | 2.108 | 2.103 |
| Re | - | -430.5398592 | 2.201 | 2.090 | 2.092 | 2.061 |
| Os | - | -427.335763  | 2.250 | 2.057 | 2.040 | 2.053 |
| Ir | - | -423.458621  | 2.345 | 1.952 | 1.970 | 2.155 |
| Pt | - | -420.0054452 | 2.482 | 2.044 | 1.996 | 2.024 |
| Au | - | -411.7909616 | 2.513 | 2.089 | 2.072 | 2.075 |

**Table S2.** The computed formation energy ( $E_f$ ), dissolution potential ( $U_{\text{diss}}$ ) of metals, the number of transferred electrons ( $N_e$ ) during the dissolution, and the standard dissolution potential ( $U_{\text{diss}}^0$ ) of metal atoms.

| M  | $U_{\text{diss}}^0$ (V) | $N_e$ | $E_f$ (eV) | $U_{\text{diss}}$ (eV) |
|----|-------------------------|-------|------------|------------------------|
| Sc | -2.08                   | 3     | -4.81      | -0.48                  |
| Ti | -1.63                   | 2     | -6.27      | 1.50                   |
| V  | -1.18                   | 2     | -6.41      | 2.03                   |
| Cr | -0.91                   | 2     | -6.92      | 2.55                   |
| Mn | -1.19                   | 2     | -3.91      | 0.76                   |
| Fe | -0.45                   | 2     | -5.20      | 2.15                   |
| Co | -0.28                   | 2     | -5.72      | 2.58                   |
| Ni | -0.26                   | 2     | -5.53      | 2.51                   |
| Cu | 0.34                    | 2     | -3.44      | 2.06                   |
| Zn | -0.76                   | 2     | -1.65      | 0.06                   |
| Y  | -2.37                   | 3     | -6.00      | -0.37                  |
| Zr | -1.45                   | 4     | -6.23      | 0.11                   |
| Nb | -1.10                   | 3     | -8.37      | 1.69                   |
| Mo | -0.20                   | 3     | -10.78     | 3.39                   |
| Ru | 0.46                    | 2     | -6.26      | 3.59                   |
| Rh | 0.60                    | 2     | -5.79      | 3.49                   |

|    |       |   |       |       |
|----|-------|---|-------|-------|
| Pd | 0.95  | 2 | -3.76 | 2.83  |
| Ag | 0.80  | 1 | -1.91 | 2.71  |
| Hf | -1.55 | 4 | -5.89 | -0.08 |
| Ta | -0.6  | 3 | -7.58 | 1.93  |
| W  | 0.1   | 3 | -7.38 | 2.56  |
| Re | 0.3   | 3 | -7.00 | 2.63  |
| Os | 0.84  | 8 | -7.14 | 1.73  |
| Ir | 1.16  | 3 | -6.95 | 3.48  |
| Pt | 1.18  | 2 | -5.86 | 4.11  |
| Au | 1.50  | 3 | -2.05 | 2.18  |

**Table S3.** The adsorption energies ( $E_{ad}$ ) for H on possible sites in  $M_2/g$ -CN, the corresponding M-H bond lengths, the Gibbs free energy change for H adsorption ( $\Delta G_{H^*}$ ), and the charge transfer between  $H^*$  and the  $M_2$  atoms.

| M  | $E_{ad}-T_I$ (eV) | $E_{ad}-B_{II}$ (eV) | The bond length for M-H (Å) | $\Delta G_{H^*}$ (eV) | $Q_e$ ( e ) |
|----|-------------------|----------------------|-----------------------------|-----------------------|-------------|
| Ti | -                 | -1.01                | 1.859                       | -0.83                 | 0.42        |
| V  | -                 | -0.72                | 1.808                       | -0.53                 | 0.46        |
| Cr | -                 | -1.56                | 1.742                       | -1.37                 | 0.45        |
| Mn | -                 | -1.05                | 1.676                       | -0.84                 | 0.39        |
| Fe | -                 | -0.82                | 1.603,1.667                 | -0.61                 | 0.29        |
| Co | -                 | -1.10                | 1.582                       | -0.87                 | 0.27        |
| Ni | -                 | -0.26                | 1.584                       | -0.05                 | 0.22        |
| Cu | -                 | -0.36                | 1.599                       | -0.16                 | 0.29        |
| Zn | -                 | -0.23                | 1.647                       | -0.03                 | 0.30        |
| Zr | -                 | -2.00                | 2.072                       | -1.85                 | 0.63        |
| Nb | -                 | -0.78                | 1.970                       | -0.62                 | 0.48        |

|    |       |       |             |       |      |
|----|-------|-------|-------------|-------|------|
| Mo | -0.49 | -     | 1.738       | -0.35 | 0.32 |
| Ru | -     | -0.68 | 1.760       | -0.47 | 0.21 |
| Rh | -     | -1.10 | 1.710       | -0.88 | 0.18 |
| Pd | -     | -0.20 | 1.678       | 0.03  | 0.08 |
| Ag | -     | -0.63 | 1.747       | -0.45 | 0.19 |
| Ta | -     | -1.63 | 1.937       | -1.44 | 0.54 |
| W  | -0.52 | -     | 1.739       | -0.37 | 0.34 |
| Re | -0.62 | -     | 1.669       | -0.44 | 0.20 |
| Os | -     | -0.63 | 1.838,1.741 | -0.44 | 0.12 |
| Ir | -     | -1.22 | 1.733       | -1.00 | 0.14 |
| Pt | -     | -0.38 | 1.695       | -0.15 | 0.04 |
| Au | -     | -1.15 | 1.727       | -0.94 | 0.07 |

**Table S4.** The adsorption energies ( $E_{ad}$ ) for  $I^*$  ( $I=O$ , OH, OOH) on possible sites in  $M_2/g$ -CN, and the corresponding M-I bond lengths.

| M  | $E_{ad-TI-I^*}$ (eV) |      |        | $E_{ad-BII-I^*}$ (eV) |       |        | The bond length for M-I (Å) |       |           |
|----|----------------------|------|--------|-----------------------|-------|--------|-----------------------------|-------|-----------|
|    | $I=O$                | $I=$ | $I=OO$ | $I=O$                 | $I=O$ | $I=OO$ | $I=OH$                      | $I=O$ | $I=OOH$   |
|    | H                    | O    | H      | H                     |       | H      |                             |       |           |
| Ti | -                    | -    | -      | -                     | -     | -4.97  | 1.992                       | 1.828 | 1.817     |
|    |                      |      |        | 2.46                  | 3.08  |        |                             |       |           |
| V  | -                    | -    | -      | -                     | -     | -2.57  | 2.003                       | 1.796 | 1.711,1.8 |
|    |                      |      |        | 1.63                  | 1.52  |        |                             |       | 57        |
| Cr | -                    | -    | -      | -                     | -     | -2.10  | 1.953                       | 1.780 | 1.784     |
|    |                      |      |        | 2.27                  | 1.92  |        |                             |       |           |
| M  | -                    | -    | -      | -                     | -     | -1.23  | 1.930                       | 1.778 | 1.776,1.7 |
| n  |                      |      |        | 1.52                  | 1.39  |        |                             |       | 92        |
| Fe | -                    | -    | -      | -                     | -     | 1.99   | 1.962                       | 1.752 | 1.757     |
|    |                      |      |        | 0.88                  | 0.45  |        |                             |       |           |



|    |      |   |       |      |      |       |           |           |           |
|----|------|---|-------|------|------|-------|-----------|-----------|-----------|
| Co | -    | - | -     | -    | -    | 1.84  | 1.855     | 1.720     | 1.792     |
|    |      |   |       | 1.28 | 0.40 |       |           |           |           |
| Ni | -    | - | -     | 0.20 | 1.12 | 3.38  | 1.903     | 1.751     | 1.875     |
| Cu | -    | - | -     | -    | 1.26 | 3.02  | 1.917,1.8 | 1.787     | 1.876     |
|    |      |   |       | 0.21 |      |       | 60        |           |           |
| Zn | -    | - | 3.56  | -    | 0.35 | -     | 1.942     | 1.804     | 1.955     |
|    |      |   |       | 0.43 |      |       |           |           |           |
| Zr | -    | - | -     | -    | -    | -5.78 | 2.165     | 1.928,1.9 | 1.955     |
|    |      |   |       | 3.72 | 4.30 |       |           | 41        |           |
| N  | -    | - | -     | -    | -    | -3.01 | 2.144     | 1.953     | 2.423,1.7 |
| b  |      |   |       | 1.73 | 1.78 |       |           |           | 69        |
| M  | -    | - | 1.83  | -    | -    | -     | 1.922     | 1.854,2.0 | 1.899     |
| o  | 1.30 |   |       |      | 1.10 |       |           | 67        |           |
| Ru | -    | - | -     | -    | 0.12 | 2.40  | 2.044,2.0 | 1.874,1.9 | 1.938,1.8 |
|    |      |   |       | 0.53 |      |       | 76        | 23        | 84        |
| Rh | -    | - | -     | -    | 0.33 | 2.34  | 2.010     | 1.881     | 1.970     |
|    |      |   |       | 0.77 |      |       |           |           |           |
| Pd | -    | - | -     | 1.07 | 1.94 | 4.21  | 2.040     | 1.914     | 2.145,2.2 |
|    |      |   |       |      |      |       |           |           | 82        |
| A  | -    | - | 3.12  | -    | 2.08 |       | 2.437,2.0 | 1.995     | 2.043     |
| g  |      |   |       | 0.12 |      |       | 53        |           |           |
| Ta | -    | - | -     | -    | -    | -4.77 | 2.129     | 1.957     | 2.125,1.8 |
|    |      |   |       | 2.71 | 3.21 |       |           |           | 30        |
| W  | -    | - | -2.64 | -    | -    | -     | 1.910     | 1.864,2.0 | 1.745     |
|    | 1.49 |   |       |      | 1.35 |       |           | 86        |           |
| Re | -    | - | -     | -    | -    | -0.32 | 1.929     | 1.952,1.9 | 2.029,1.8 |
|    | 0.74 |   |       |      | 0.26 |       |           | 72        | 80        |
| Os | -    | - | -     | -    | 0.37 | 0.51  | 2.124,2.0 | 1.966,1.9 | 1.977,1.8 |
|    |      |   |       | 0.01 |      |       | 51        | 15        | 91        |

|    |      |   |      |      |      |      |       |       |       |
|----|------|---|------|------|------|------|-------|-------|-------|
| Ir | -    | - | -    | -    | 0.18 | 2.47 | 2.022 | 1.908 | 1.973 |
|    |      |   |      | 0.63 |      |      |       |       |       |
| Pt | -    | - | 2.49 | 1.29 | 1.78 |      | 2.057 | 1.945 | 2.507 |
| A  | -    | - | 3.34 | -    | -    | -    | 1.953 | 1.961 | 1.964 |
| u  | 0.12 |   |      |      | 1.08 |      |       |       |       |

**Table S5.** The Gibbs free energy change for oxygenated intermediate adsorption ( $\Delta G_{O^*}$ ,  $\Delta G_{OH^*}$ ,  $\Delta G_{OOH^*}$ ) on  $M_2/g\text{-CN}$ , the overpotentials for OER ( $\eta^{OER}$ ), and the overpotentials for ORR ( $\eta^{ORR}$ ).

| M  | $\Delta G_{OH^*}$<br>(eV) | $\Delta G_{OH^*}$<br>under<br>solvation<br>correction<br>(eV) | $\Delta G_{O^*}$<br>(eV) | $\Delta G_{OOH^*}$<br>(eV) | $\Delta G_{OOH^*}$<br>(eV) | $\eta^{OER}$<br>(V) | $\eta^{ORR}$<br>(V) |
|----|---------------------------|---------------------------------------------------------------|--------------------------|----------------------------|----------------------------|---------------------|---------------------|
| Ti | -2.16                     | -2.46                                                         | -3.01                    | -4.64                      | -4.94                      | 8.33                | 3.39                |
| V  | -1.29                     | -1.59                                                         | -1.47                    | -2.22                      | -2.52                      | 5.92                | 2.52                |
| Cr | -1.92                     | -2.22                                                         | -1.87                    | -1.75                      | -2.05                      | 5.44                | 3.15                |
| Mn | -1.18                     | -1.48                                                         | 1.32                     | -0.87                      | -1.17                      | 4.56                | 2.41                |
| Fe | -0.54                     | -0.84                                                         | -0.38                    | 2.28                       | 1.98                       | 1.43                | 1.77                |
| Co | -0.90                     | -1.20                                                         | -0.33                    | 2.20                       | 1.90                       | 1.49                | 2.13                |
| Ni | 0.56                      | 0.26                                                          | 1.20                     | 3.74                       | 3.44                       | 1.31                | 0.67                |
| Cu | 0.14                      | -0.16                                                         | 1.31                     | 3.37                       | 3.07                       | 0.82                | 1.09                |
| Zn | -0.07                     | -0.307                                                        | 0.41                     | 3.92                       | 3.62                       | 2.28                | 1.30                |
| Zr | -3.42                     | -3.72                                                         | -4.23                    | -5.48                      | -5.78                      | 9.17                | 4.65                |
| Nb | -1.42                     | -1.72                                                         | -1.73                    | -2.68                      | -2.98                      | 6.37                | 2.65                |
| Mo | -0.99                     | -1.29                                                         | -1.05                    | 2.16                       | 1.86                       | 1.97                | 2.22                |
| Ru | -0.17                     | -0.47                                                         | 0.18                     | 2.72                       | 2.42                       | 1.31                | 1.40                |
| Rh | -0.39                     | -0.69                                                         | 0.40                     | 2.70                       | 2.40                       | 1.07                | 1.62                |
| Pd | 1.44                      | 1.14                                                          | 2.00                     | 4.54                       | 4.24                       | 1.31                | 0.85                |

|    |       |       |       |       |       |      |      |
|----|-------|-------|-------|-------|-------|------|------|
| Ag | 0.17  | -0.13 | 2.11  | 3.43  | 3.13  | 0.71 | 1.06 |
| Ta | -2.38 | -2.68 | -3.16 | -4.40 | -4.70 | 8.09 | 3.61 |
| W  | -1.18 | -1.48 | -1.30 | -2.26 | -2.56 | 5.95 | 2.41 |
| Re | -0.42 | -0.72 | -0.19 | 0.09  | -0.21 | 3.60 | 1.65 |
| Os | 0.34  | 0.04  | 0.43  | 0.91  | 0.61  | 2.78 | 1.14 |
| Ir | -0.25 | -0.55 | 0.25  | 2.83  | 2.53  | 1.34 | 1.48 |
| Pt | 1.67  | 1.37  | 1.85  | 5.03  | 4.73  | 1.95 | 1.34 |
| Au | 0.18  | -0.12 | 1.14  | 3.65  | 3.35  | 1.29 | 1.05 |

**Table S6.** The bond lengths for  $M_I$ - $M_{II}$ ,  $M_I$ -N, and  $M_{II}$ -N in  $M_I M_{II}$ /g-CN ( $M_I$  = Ti, V, Cr, Mn, Fe, Co, Ni, Cu, Zn, Zr, Nb, Mo, Ru, Rh, Pd, Ag, Ta, W, Re, Os, Ir, Pt, Au;  $M_{II}$  = V, Cr, Mn, Fe, Co, Ni, Cu, Zn, Zr, Nb, Mo, Ru, Rh, Pd, Ag, Ta, W, Re, Os, Ir, Pt, Au;  $M_I \neq M_{II}$ ).

| $M_I M_{II}$ /g-CN |          | The bond lengths (Å) |           |           |           |              |              |              |
|--------------------|----------|----------------------|-----------|-----------|-----------|--------------|--------------|--------------|
| $M_I$              | $M_{II}$ | $M_I$ - $M_{II}$     | $M_I$ -N1 | $M_I$ -N2 | $M_I$ -N3 | $M_{II}$ -N1 | $M_{II}$ -N2 | $M_{II}$ -N3 |
| Ti                 | Fe       | 1.958                | 2.207     | 2.177     | 2.164     | 2.046        | 2.020        | 2.092        |
| Ti                 | Co       | 2.036                | 2.175     | 2.159     | 2.131     | 2.028        | 1.995        | 2.069        |
| Ti                 | Ni       | 2.233                | 2.118     | 2.076     | 2.085     | 2.023        | 1.943        | 2.049        |
| Ti                 | Cu       | 2.435                | 2.101     | 2.008     | 2.090     | 2.046        | 1.931        | 2.043        |
| Ti                 | Pd       | 2.281                | 2.129     | 2.00      | 2.100     | 2.149        | 2.137        | 2.174        |
| Ti                 | Pt       | 2.323                | 2.131     | 2.048     | 2.086     | 2.077        | 2.103        | 2.098        |
| V                  | Ti       | 1.915                | 2.145     | 2.002     | 2.100     | 2.155        | 2.080        | 2.198        |
| V                  | Fe       | 1.931                | 2.151     | 2.151     | 2.100     | 2.044        | 2.058        | 2.097        |
| V                  | Co       | 2.110                | 2.130     | 2.084     | 2.099     | 2.027        | 1.981        | 2.063        |
| V                  | Ni       | 2.220                | 2.052     | 2.042     | 2.120     | 2.062        | 1.928        | 1.979        |
| V                  | Cu       | 2.455                | 2.085     | 1.960     | 2.083     | 2.023        | 1.930        | 2.046        |
| V                  | Pd       | 2.281                | 2.093     | 1.967     | 2.100     | 2.125        | 2.100        | 2.123        |
| V                  | Pt       | 2.320                | 2.086     | 2.011     | 2.108     | 2.076        | 2.121        | 2.063        |

|    |    |       |       |       |       |       |       |       |
|----|----|-------|-------|-------|-------|-------|-------|-------|
| Cr | Ti | 1.835 | 2.122 | 1.982 | 2.071 | 2.181 | 2.142 | 2.228 |
| Cr | V  | 1.877 | 2.148 | 2.063 | 2.098 | 2.125 | 2.091 | 2.168 |
| Cr | Mn | 2.001 | 2.120 | 2.078 | 2.082 | 2.055 | 2.051 | 2.101 |
| Cr | Fe | 2.424 | 2.068 | 1.945 | 2.048 | 1.995 | 1.853 | 2.008 |
| Cr | Co | 2.217 | 2.029 | 2.015 | 2.159 | 2.112 | 1.926 | 1.945 |
| Cr | Ni | 2.343 | 2.084 | 1.986 | 2.061 | 1.987 | 1.899 | 2.026 |
| Cr | Cu | 2.435 | 2.059 | 1.936 | 2.049 | 2.007 | 1.916 | 2.031 |
| Cr | Zn | 2.401 | 2.076 | 1.931 | 2.052 | 2.126 | 1.918 | 2.120 |
| Cr | Zr | 1.975 | 2.089 | 1.923 | 2.053 | 2.222 | 2.183 | 2.258 |
| Cr | Nb | 1.915 | 2.116 | 1.958 | 2.072 | 2.167 | 2.125 | 2.216 |
| Cr | Mo | 2.017 | 2.131 | 2.039 | 2.088 | 2.119 | 2.137 | 2.163 |
| Cr | Ru | 2.089 | 2.122 | 2.023 | 2.086 | 2.102 | 2.106 | 2.129 |
| Cr | Rh | 2.302 | 2.106 | 1.961 | 2.108 | 2.097 | 2.028 | 2.096 |
| Cr | Pd | 2.387 | 2.113 | 1.955 | 2.082 | 2.098 | 2.098 | 2.125 |
| Cr | Ag | 2.461 | 2.075 | 1.909 | 2.062 | 2.136 | 2.131 | 2.156 |
| Cr | Ta | 2.032 | 2.103 | 1.964 | 2.062 | 2.139 | 2.092 | 2.173 |
| Cr | W  | 2.119 | 2.111 | 2.037 | 2.067 | 2.099 | 2.133 | 2.136 |
| Cr | Re | 2.107 | 2.121 | 2.046 | 2.079 | 2.064 | 2.125 | 2.097 |
| Cr | Os | 2.137 | 2.108 | 2.038 | 2.073 | 2.055 | 2.089 | 2.080 |
| Cr | Ir | 2.289 | 2.088 | 1.983 | 2.103 | 2.059 | 2.036 | 2.056 |
| Cr | Pt | 2.413 | 2.109 | 1.969 | 2.074 | 2.045 | 2.098 | 2.064 |
| Cr | Au | 2.466 | 2.036 | 1.871 | 2.004 | 2.071 | 2.150 | 2.093 |
| Mn | Ti | 1.911 | 2.111 | 2.010 | 2.071 | 2.172 | 2.159 | 2.216 |
| Mn | V  | 2.000 | 2.124 | 2.055 | 2.082 | 2.114 | 2.102 | 2.157 |
| Mn | Fe | 2.291 | 2.071 | 1.980 | 2.039 | 2.002 | 1.927 | 2.038 |
| Mn | Co | 2.251 | 2.090 | 2.027 | 2.056 | 1.982 | 1.902 | 2.022 |
| Mn | Ni | 2.335 | 2.052 | 1.975 | 2.022 | 1.987 | 1.900 | 2.020 |
| Mn | Cu | 2.407 | 2.044 | 1.949 | 2.020 | 2.035 | 1.939 | 2.053 |
| Mn | Pd | 2.348 | 2.058 | 1.943 | 2.026 | 2.084 | 2.073 | 2.108 |

|    |    |       |       |       |       |       |       |       |
|----|----|-------|-------|-------|-------|-------|-------|-------|
| Mn | Pt | 2.366 | 2.057 | 1.958 | 2.023 | 2.042 | 2.060 | 2.059 |
| Fe | Co | 2.206 | 2.064 | 2.003 | 2.021 | 1.991 | 1.927 | 2.032 |
| Fe | Ni | 2.327 | 2.033 | 1.946 | 2.005 | 1.989 | 1.898 | 2.015 |
| Fe | Cu | 2.361 | 2.052 | 1.952 | 2.028 | 2.050 | 1.950 | 2.062 |
| Fe | Pd | 2.315 | 2.026 | 1.911 | 2.006 | 2.072 | 2.033 | 2.089 |
| Fe | Pt | 2.343 | 2.023 | 1.927 | 1.997 | 2.040 | 2.034 | 2.055 |
| Co | Ni | 2.397 | 2.007 | 1.872 | 1.973 | 1.984 | 1.907 | 2.017 |
| Cu | Co | 2.456 | 2.038 | 1.947 | 2.003 | 1.964 | 1.808 | 1.973 |
| Cu | Ni | 2.389 | 2.076 | 1.963 | 2.043 | 2.003 | 1.874 | 2.024 |
| Cu | Pd | 2.409 | 2.069 | 1.923 | 2.043 | 2.074 | 2.016 | 2.088 |
| Cu | Pt | 2.425 | 2.051 | 1.917 | 2.020 | 2.041 | 1.986 | 2.049 |
| Zn | Ti | 2.556 | 2.344 | 2.137 | -     | 2.245 | 2.026 | 2.108 |
| Zn | V  | 2.403 | 2.103 | 1.906 | 2.153 | 2.089 | 1.945 | 2.069 |
| Zn | Mn | 2.369 | 2.209 | 1.987 | 2.245 | 2.038 | 1.944 | 2.060 |
| Zn | Fe | 2.309 | 2.093 | 1.984 | 2.246 | 2.105 | 1.898 | 1.966 |
| Zn | Co | 2.315 | 2.168 | 2.023 | 2.158 | 1.987 | 1.836 | 2.011 |
| Zn | Ni | 2.265 | 2.182 | 2.036 | 2.177 | 1.992 | 1.866 | 2.043 |
| Zn | Cu | 2.320 | 2.150 | 1.977 | 2.144 | 2.048 | 1.921 | 2.073 |
| Zn | Pd | 2.335 | 2.222 | 1.977 | 2.230 | 2.097 | 2.053 | 2.125 |
| Zn | Pt | 2.351 | 2.231 | 1.994 | 2.221 | 2.052 | 2.048 | 2.070 |
| Zr | Ti | 2.111 | 2.221 | 2.090 | 2.188 | 2.122 | 1.972 | 2.153 |
| Zr | V  | 2.042 | 2.236 | 2.133 | 2.200 | 2.083 | 1.945 | 2.116 |
| Zr | Mn | 1.968 | 2.255 | 2.180 | 2.216 | 2.038 | 1.883 | 2.068 |
| Zr | Fe | 2.161 | 2.283 | 2.252 | 2.255 | 2.033 | 1.954 | 2.062 |
| Zr | Co | 2.182 | 2.257 | 2.242 | 2.230 | 2.021 | 1.935 | 2.050 |
| Zr | Ni | 2.325 | 2.209 | 2.188 | 2.187 | 2.025 | 1.921 | 2.047 |
| Zr | Cu | 2.498 | 2.209 | 2.211 | 2.376 | -     | 2.034 | 2.074 |
| Zr | Zn | 2.722 | 2.266 | 2.252 | 2.399 | -     | -     | -     |
| Zr | Nb | 2.151 | 2.219 | 2.087 | 2.186 | 2.130 | 2.018 | 2.163 |

|    |    |       |       |       |       |       |       |       |
|----|----|-------|-------|-------|-------|-------|-------|-------|
| Zr | Rh | 2.284 | 2.273 | 2.200 | 2.258 | 2.129 | 2.086 | 2.141 |
| Zr | Pd | 2.393 | 2.222 | 2.136 | 2.202 | 2.139 | 2.116 | 2.158 |
| Zr | Ag | 2.677 | 2.277 | 2.257 | 2.415 | -     | -     | -     |
| Zr | Ta | 2.190 | 2.211 | 2.074 | 2.181 | 2.116 | 2.003 | 2.146 |
| Zr | Ir | 2.359 | 2.270 | 2.203 | 2.250 | 2.064 | 2.065 | 2.080 |
| Zr | Pt | 2.444 | 2.232 | 2.151 | 2.205 | 2.073 | 2.106 | 2.091 |
| Zr | Au | 2.577 | 2.205 | 2.082 | 2.183 | 2.095 | 2.148 | 2.102 |
| Nb | Ti | 2.031 | 2.181 | 2.061 | 2.143 | 2.136 | 2.024 | 2.174 |
| Nb | V  | 1.941 | 2.204 | 2.110 | 2.162 | 2.102 | 2.005 | 2.145 |
| Nb | Mn | 2.054 | 2.209 | 2.188 | 2.170 | 2.065 | 2.006 | 2.103 |
| Nb | Fe | 2.100 | 2.190 | 2.194 | 2.155 | 2.044 | 1.987 | 2.078 |
| Nb | Co | 2.151 | 2.157 | 2.175 | 2.125 | 2.025 | 1.950 | 2.057 |
| Nb | Ni | 2.287 | 2.131 | 2.125 | 2.110 | 2.033 | 1.921 | 2.041 |
| Nb | Cu | 2.432 | 2.136 | 2.102 | 2.254 | -     | 2.010 | 2.026 |
| Nb | Zn | 2.606 | 2.136 | 2.111 | 2.233 | -     | 2.164 | -     |
| Nb | Rh | 2.229 | 2.161 | 2.118 | 2.130 | 2.115 | 2.068 | 2.139 |
| Nb | Pd | 2.354 | 2.132 | 2.067 | 2.120 | 2.140 | 2.100 | 2.146 |
| Nb | Pt | 2.392 | 2.135 | 2.081 | 2.110 | 2.075 | 2.081 | 2.092 |
| Mo | Ti | 1.962 | 2.154 | 2.042 | 2.112 | 2.153 | 2.071 | 2.194 |
| Mo | V  | 1.926 | 2.171 | 2.064 | 2.127 | 2.103 | 2.015 | 2.154 |
| Mo | Mn | 2.080 | 2.148 | 2.156 | 2.113 | 2.073 | 2.015 | 2.108 |
| Mo | Fe | 2.070 | 2.134 | 2.157 | 2.102 | 2.029 | 1.988 | 2.072 |
| Mo | Co | 2.146 | 2.114 | 2.130 | 2.091 | 2.027 | 1.944 | 2.044 |
| Mo | Ni | 2.235 | 2.032 | 2.060 | 2.165 | 2.177 | 1.893 | 1.912 |
| Mo | Cu | 2.495 | 2.112 | 1.990 | 2.115 | 2.046 | 1.931 | 2.064 |
| Mo | Zn | 2.487 | 2.028 | 2.038 | -     | -     | 2.031 | 2.030 |
| Mo | Zr | 2.086 | 2.132 | 1.998 | 2.098 | 2.200 | 2.125 | 2.235 |
| Mo | Nb | 2.032 | 2.149 | 2.024 | 2.110 | 2.146 | 2.074 | 2.189 |
| Mo | Ru | 2.162 | 2.131 | 2.103 | 2.100 | 2.099 | 2.072 | 2.124 |

|    |    |       |       |       |       |       |       |       |
|----|----|-------|-------|-------|-------|-------|-------|-------|
| Mo | Rh | 2.221 | 2.114 | 2.065 | 2.092 | 2.111 | 2.053 | 2.125 |
| Mo | Pd | 2.439 | 2.138 | 1.996 | 2.127 | 2.131 | 2.071 | 2.144 |
| Mo | Ag | 2.670 | 2.128 | 1.991 | 2.232 | -     | 2.392 | -     |
| Mo | Ta | 2.089 | 2.140 | 2.006 | 2.103 | 2.130 | 2.039 | 2.166 |
| Mo | W  | 2.223 | 2.154 | 2.127 | 2.131 | 2.105 | 2.120 | 2.131 |
| Mo | Re | 2.201 | 2.147 | 2.125 | 2.112 | 2.065 | 2.094 | 2.099 |
| Mo | Os | 2.222 | 2.124 | 2.108 | 2.092 | 2.058 | 2.066 | 2.083 |
| Mo | Ir | 2.271 | 2.109 | 2.078 | 2.083 | 2.063 | 2.048 | 2.081 |
| Mo | Pt | 2.455 | 2.138 | 2.011 | 2.111 | 2.075 | 2.044 | 2.097 |
| Mo | Au | 2.560 | 2.137 | 1.982 | 2.115 | 2.084 | 2.136 | 2.097 |
| Ru | Ti | 2.051 | 2.118 | 2.091 | 2.094 | 2.157 | 2.113 | 2.196 |
| Ru | V  | 2.050 | 2.132 | 2.125 | 2.103 | 2.098 | 2.073 | 2.139 |
| Ru | Mn | 2.275 | 2.101 | 2.004 | 2.090 | 2.082 | 1.973 | 2.110 |
| Ru | Fe | 2.146 | 2.003 | 2.028 | 2.221 | 2.234 | 1.921 | 1.916 |
| Ru | Co | 2.205 | 1.991 | 2.005 | 2.219 | 2.228 | 1.873 | 1.887 |
| Ru | Ni | 2.311 | 2.030 | 1.998 | 2.096 | 2.050 | 1.901 | 1.981 |
| Ru | Cu | 2.484 | 2.050 | 1.904 | 2.058 | 2.040 | 1.948 | 2.079 |
| Ru | Zn | 2.454 | 2.065 | 1.903 | 2.123 | -     | 2.020 | 2.189 |
| Ru | Zr | 2.264 | 2.103 | 2.023 | 2.114 | 2.273 | 2.234 | 2.285 |
| Ru | Nb | 2.170 | 2.123 | 2.080 | 2.103 | 2.167 | 2.159 | 2.197 |
| Ru | Rh | 2.333 | 1.994 | 1.937 | 2.214 | 2.222 | 1.959 | 2.009 |
| Ru | Pd | 2.496 | 2.103 | 1.910 | 2.082 | 2.116 | 2.048 | 2.145 |
| Ru | Ag | 2.590 | 2.080 | 1.875 | 2.104 | 2.537 | 2.285 | 2.518 |
| Ru | Ta | 2.230 | 2.112 | 2.065 | 2.083 | 2.138 | 2.143 | 2.169 |
| Ru | Ir | 2.432 | 2.059 | 1.944 | 2.120 | 2.080 | 1.966 | 2.060 |
| Ru | Pt | 2.502 | 2.096 | 1.920 | 2.068 | 2.068 | 2.003 | 2.090 |
| Ru | Au | 2.535 | 2.070 | 1.906 | 2.047 | 2.076 | 2.134 | 2.098 |
| Rh | Ti | 2.115 | 2.138 | 2.117 | 2.114 | 2.132 | 2.089 | 2.170 |
| Rh | V  | 2.123 | 2.140 | 2.107 | 2.116 | 2.089 | 2.033 | 2.122 |

|    |    |       |       |       |       |       |       |       |
|----|----|-------|-------|-------|-------|-------|-------|-------|
| Rh | Mn | 2.312 | 2.095 | 2.015 | 2.075 | 2.071 | 1.996 | 2.114 |
| Rh | Fe | 2.256 | 2.068 | 2.017 | 2.065 | 2.022 | 1.966 | 2.043 |
| Rh | Co | 2.295 | 2.023 | 1.991 | 2.121 | 2.082 | 1.903 | 1.964 |
| Rh | Ni | 2.391 | 2.055 | 1.959 | 2.041 | 1.982 | 1.885 | 2.031 |
| Rh | Cu | 2.446 | 2.041 | 1.917 | 2.042 | 2.006 | 1.921 | 2.042 |
| Rh | Zn | 2.378 | 2.046 | 1.925 | 2.055 | 2.142 | 1.944 | 2.127 |
| Rh | Pd | 2.475 | 2.086 | 1.937 | 2.060 | 2.093 | 2.046 | 2.126 |
| Rh | Pt | 2.494 | 2.087 | 1.952 | 2.052 | 2.049 | 2.029 | 2.072 |
| Pd | Co | 2.364 | 2.098 | 2.041 | 2.070 | 1.973 | 1.846 | 2.009 |
| Pd | Ni | 2.374 | 2.088 | 2.013 | 2.067 | 1.982 | 1.858 | 2.020 |
| Pd | Pt | 2.464 | 2.086 | 2.006 | 2.062 | 2.036 | 1.993 | 2.052 |
| Ag | Ti | 2.594 | -     | -     | -     | 2.273 | 2.053 | 2.195 |
| Ag | V  | 2.604 | 2.478 | 2.256 | -     | 2.176 | 1.946 | 2.123 |
| Ag | Mn | 2.395 | 2.117 | 2.070 | 2.096 | 2.001 | 1.860 | 2.016 |
| Ag | Fe | 2.397 | 2.128 | 2.089 | 2.100 | 1.986 | 1.818 | 1.998 |
| Ag | Co | 2.389 | 2.137 | 2.106 | 2.107 | 1.967 | 1.782 | 1.979 |
| Ag | Ni | 2.360 | 2.157 | 2.110 | 2.133 | 2.007 | 1.825 | 2.024 |
| Ag | Cu | 2.386 | 2.160 | 2.174 | 2.150 | 2.056 | 1.909 | 2.059 |
| Ag | Zn | 2.367 | 2.193 | 2.122 | 2.170 | 2.157 | 1.916 | 2.140 |
| Ag | Nb | 2.638 | -     | -     | -     | 2.257 | 2.099 | 2.181 |
| Ag | Rh | 2.432 | 2.123 | 2.058 | 2.093 | 2.033 | 1.889 | 2.036 |
| Ag | Pd | 2.474 | 2.181 | 2.117 | 2.159 | 2.078 | 1.992 | 2.087 |
| Ag | Pt | 2.486 | 2.143 | 2.090 | 2.119 | 2.039 | 1.969 | 2.046 |
| Ta | Ti | 2.078 | 2.160 | 2.037 | 2.126 | 2.130 | 2.012 | 2.166 |
| Ta | V  | 2.003 | 2.179 | 2.072 | 2.139 | 2.092 | 1.986 | 2.136 |
| Ta | Mn | 2.180 | 2.183 | 2.160 | 2.151 | 2.054 | 1.995 | 2.090 |
| Ta | Fe | 2.169 | 2.157 | 2.168 | 2.125 | 2.025 | 1.977 | 2.064 |
| Ta | Co | 2.209 | 2.132 | 2.150 | 2.102 | 2.012 | 1.940 | 2.050 |
| Ta | Ni | 2.301 | 2.110 | 2.110 | 2.082 | 2.013 | 1.918 | 2.039 |



|    |    |       |       |       |       |       |       |       |
|----|----|-------|-------|-------|-------|-------|-------|-------|
| Ta | Cu | 2.411 | 2.118 | 2.073 | 2.214 | -     | 2.031 | 2.029 |
| Ta | Zn | 2.557 | 2.094 | 2.084 | 2.243 | -     | 2.083 | 2.173 |
| Ta | Nb | 2.111 | 2.163 | 2.035 | 2.130 | 2.139 | 2.044 | 2.175 |
| Ta | Rh | 2.276 | 2.135 | 2.103 | 2.106 | 2.100 | 2.058 | 2.128 |
| Ta | Pd | 2.368 | 2.114 | 2.062 | 2.092 | 2.130 | 2.102 | 2.144 |
| Ta | Ag | 2.622 | 2.157 | 2.070 | 2.217 | -     | -     | -     |
| Ta | Pt | 2.402 | 2.116 | 2.080 | 2.087 | 2.067 | 2.080 | 2.090 |
| W  | Ti | 2.025 | 2.129 | 2.011 | 2.094 | 2.144 | 2.050 | 2.184 |
| W  | V  | 1.994 | 2.139 | 2.021 | 2.104 | 2.094 | 1.994 | 2.144 |
| W  | Mn | 2.150 | 2.112 | 2.133 | 2.079 | 2.057 | 2.011 | 2.096 |
| W  | Fe | 2.162 | 2.099 | 2.125 | 2.068 | 2.022 | 1.981 | 2.063 |
| W  | Co | 2.189 | 2.083 | 2.113 | 2.056 | 2.009 | 1.948 | 2.043 |
| W  | Ni | 2.257 | 2.038 | 2.076 | 2.054 | 2.049 | 1.913 | 1.974 |
| W  | Cu | 2.441 | 2.062 | 1.986 | 2.063 | 2.059 | 1.927 | 2.068 |
| W  | Zn | 2.482 | 2.016 | 2.024 | -     | -     | 2.023 | 2.019 |
| W  | Zr | 2.139 | 2.114 | 1.980 | 2.083 | 2.192 | 2.103 | 2.225 |
| W  | Nb | 2.091 | 2.126 | 1.996 | 2.092 | 2.140 | 2.053 | 2.178 |
| W  | Ru | 2.215 | 2.095 | 2.093 | 2.066 | 2.085 | 2.065 | 2.114 |
| W  | Rh | 2.259 | 2.086 | 2.057 | 2.056 | 2.095 | 2.052 | 2.117 |
| W  | Pd | 2.353 | 2.044 | 2.013 | 2.077 | 2.161 | 2.093 | 2.091 |
| W  | Ag | 2.609 | 2.104 | 2.002 | 2.176 | -     | -     | -     |
| W  | Ta | 2.142 | 2.117 | 1.986 | 2.085 | 2.123 | 2.027 | 2.156 |
| W  | Re | 2.242 | 2.119 | 2.112 | 2.087 | 2.066 | 2.087 | 2.092 |
| W  | Os | 2.257 | 2.093 | 2.097 | 2.063 | 2.055 | 2.063 | 2.082 |
| W  | Ir | 2.297 | 2.076 | 2.075 | 2.050 | 2.054 | 2.051 | 2.074 |
| W  | Pt | 2.378 | 2.051 | 2.040 | 2.056 | 2.079 | 2.077 | 2.065 |
| W  | Au | 2.545 | 2.091 | 1.974 | 2.073 | 2.085 | 2.122 | 2.094 |
| Re | Ti | 2.032 | 2.102 | 2.008 | 2.074 | 2.141 | 2.066 | 2.182 |
| Re | V  | 2.095 | 2.104 | 2.116 | 2.072 | 2.096 | 2.084 | 2.145 |

|    |    |       |       |       |       |       |       |       |
|----|----|-------|-------|-------|-------|-------|-------|-------|
| Re | Mn | 2.141 | 2.089 | 2.094 | 2.063 | 2.049 | 2.016 | 2.091 |
| Re | Fe | 2.105 | 2.076 | 2.106 | 2.053 | 2.023 | 2.003 | 2.061 |
| Re | Co | 2.156 | 2.020 | 2.061 | 2.115 | 2.179 | 1.938 | 1.916 |
| Re | Ni | 2.308 | 2.048 | 2.028 | 2.044 | 2.003 | 1.909 | 2.015 |
| Re | Cu | 2.436 | 2.051 | 1.963 | 2.046 | 2.043 | 1.930 | 2.063 |
| Re | Zn | 2.336 | 1.956 | 1.971 | -     | -     | 1.908 | 1.899 |
| Re | Zr | 2.136 | 2.090 | 1.955 | 2.066 | 2.186 | 2.098 | 2.222 |
| Re | Nb | 2.253 | 2.093 | 2.082 | 2.076 | 2.189 | 2.174 | 2.213 |
| Re | Ru | 2.210 | 2.080 | 2.053 | 2.058 | 2.089 | 2.056 | 2.111 |
| Re | Rh | 2.246 | 1.985 | 1.994 | 2.153 | 2.247 | 2.024 | 1.977 |
| Re | Pd | 2.423 | 2.078 | 1.977 | 2.061 | 2.108 | 2.075 | 2.134 |
| Re | Ag | 2.587 | 2.074 | 1.934 | 2.108 | -     | 2.315 | -     |
| Re | Ta | 2.287 | 2.093 | 2.073 | 2.072 | 2.159 | 2.151 | 2.190 |
| Re | Os | 2.227 | 2.076 | 2.073 | 2.053 | 2.053 | 2.063 | 2.077 |
| Re | Ir | 2.278 | 2.055 | 2.039 | 2.054 | 2.065 | 2.039 | 2.063 |
| Re | Pt | 2.446 | 2.076 | 1.993 | 2.058 | 2.062 | 2.051 | 2.084 |
| Re | Au | 2.505 | 2.054 | 1.963 | 2.039 | 2.069 | 2.100 | 2.085 |
| Os | Ti | 2.156 | 2.074 | 2.077 | 2.051 | 2.151 | 2.113 | 2.188 |
| Os | V  | 2.122 | 2.083 | 2.108 | 2.057 | 2.080 | 2.080 | 2.125 |
| Os | Mn | 2.236 | 2.041 | 2.022 | 2.080 | 2.146 | 1.988 | 2.030 |
| Os | Fe | 2.164 | 1.999 | 2.032 | 2.129 | 2.206 | 1.958 | 1.918 |
| Os | Co | 2.211 | 1.990 | 2.005 | 2.138 | 2.211 | 1.904 | 1.891 |
| Os | Ni | 2.319 | 2.027 | 1.995 | 2.036 | 2.013 | 1.915 | 2.009 |
| Os | Cu | 2.471 | 2.032 | 1.907 | 2.036 | 2.039 | 1.948 | 2.088 |
| Os | Zn | 2.432 | 1.968 | 1.924 | -     | -     | 2.024 | 2.031 |
| Os | Zr | 2.349 | 2.071 | 2.026 | 2.072 | 2.276 | 2.230 | 2.290 |
| Os | Nb | 2.246 | 2.080 | 2.073 | 2.058 | 2.158 | 2.160 | 2.189 |
| Os | Ru | 2.272 | 2.045 | 2.001 | 2.090 | 2.140 | 2.010 | 2.057 |
| Os | Rh | 2.348 | 1.996 | 1.942 | 2.138 | 2.219 | 1.979 | 2.007 |

|    |    |       |       |       |       |       |       |       |
|----|----|-------|-------|-------|-------|-------|-------|-------|
| Os | Pd | 2.482 | 2.061 | 1.924 | 2.057 | 2.126 | 2.057 | 2.125 |
| Os | Ag | 2.585 | 2.058 | 1.883 | 2.073 | 2.518 | 2.280 | 2.507 |
| Os | Ta | 2.277 | 2.079 | 2.062 | 2.052 | 2.133 | 2.147 | 2.159 |
| Os | Ir | 2.368 | 2.000 | 1.963 | 2.125 | 2.129 | 1.980 | 2.013 |
| Os | Pt | 2.497 | 2.069 | 1.934 | 2.045 | 2.063 | 2.008 | 2.091 |
| Os | Au | 2.534 | 2.042 | 1.911 | 2.026 | 2.078 | 2.118 | 2.099 |
| Ir | Ti | 2.199 | 2.078 | 2.096 | 2.057 | 2.123 | 2.099 | 2.159 |
| Ir | V  | 2.189 | 2.081 | 2.087 | 2.062 | 2.072 | 2.045 | 2.113 |
| Ir | Mn | 2.330 | 2.053 | 2.005 | 2.035 | 2.063 | 1.995 | 2.103 |
| Ir | Fe | 2.282 | 2.042 | 2.014 | 2.031 | 2.006 | 1.975 | 2.046 |
| Ir | Co | 2.294 | 2.026 | 2.004 | 2.046 | 2.025 | 1.932 | 2.000 |
| Ir | Ni | 2.403 | 2.031 | 1.961 | 2.019 | 1.977 | 1.889 | 2.027 |
| Ir | Cu | 2.449 | 2.023 | 1.923 | 2.023 | 2.000 | 1.915 | 2.041 |
| Ir | Zn | 2.386 | 2.028 | 1.935 | 2.029 | 2.138 | 1.949 | 2.133 |
| Ir | Nb | 2.290 | 2.086 | 2.059 | 2.066 | 2.123 | 2.130 | 2.155 |
| Ir | Rh | 2.330 | 1.960 | 1.942 | 2.167 | 2.242 | 1.963 | 1.948 |
| Ir | Pd | 2.484 | 2.053 | 1.939 | 2.033 | 2.087 | 2.045 | 2.123 |
| Ir | Ag | 2.497 | 2.032 | 1.907 | 2.026 | 2.119 | 2.103 | 2.147 |
| Ir | Ta | 2.317 | 2.084 | 2.053 | 2.062 | 2.100 | 2.115 | 2.128 |
| Ir | Pt | 2.505 | 2.051 | 1.953 | 2.026 | 2.044 | 2.029 | 2.069 |
| Pt | Co | 2.388 | 2.053 | 2.031 | 2.035 | 1.967 | 1.866 | 2.004 |
| Pt | Ni | 2.399 | 2.050 | 2.007 | 2.035 | 1.971 | 1.867 | 2.015 |
| Au | Ti | 2.483 | 2.095 | 2.150 | 2.082 | 2.085 | 1.978 | 2.107 |
| Au | V  | 2.407 | 2.075 | 2.082 | 2.059 | 2.038 | 1.939 | 2.051 |
| Au | Mn | 2.410 | 2.074 | 2.074 | 2.056 | 1.991 | 1.885 | 2.016 |
| Au | Fe | 2.414 | 2.076 | 2.086 | 2.058 | 1.973 | 1.845 | 1.998 |
| Au | Co | 2.412 | 2.087 | 2.101 | 2.059 | 1.953 | 1.803 | 1.978 |
| Au | Ni | 2.403 | 2.082 | 2.073 | 2.062 | 1.979 | 1.837 | 2.008 |
| Au | Cu | 2.419 | 2.089 | 2.171 | 2.079 | 2.052 | 1.920 | 2.062 |

|    |    |       |       |       |       |       |       |       |
|----|----|-------|-------|-------|-------|-------|-------|-------|
| Au | Zn | 2.338 | 2.101 | 2.066 | 2.075 | 2.148 | 1.929 | 2.137 |
| Au | Nb | 2.519 | 2.096 | 2.136 | 2.109 | 2.113 | 2.028 | 2.113 |
| Au | Rh | 2.464 | 2.072 | 2.061 | 2.048 | 2.014 | 1.906 | 2.029 |
| Au | Pd | 2.450 | 2.069 | 2.035 | 2.047 | 2.041 | 1.949 | 2.058 |
| Au | Ag | 2.604 | 2.141 | 2.209 | 2.126 | 2.477 | 2.213 | 2.491 |
| Au | Ta | 2.512 | 2.096 | 2.129 | 2.099 | 2.079 | 2.020 | 2.095 |
| Au | Ir | 2.483 | 2.066 | 2.048 | 2.042 | 2.001 | 1.919 | 2.013 |
| Au | Pt | 2.475 | 2.062 | 2.038 | 2.046 | 2.022 | 1.954 | 2.035 |

**Table S7.** The adsorption energies ( $E_{ad}$ ) for H on possible sites in  $M_I M_{II}/g-CN$  ( $M_I =$  Ti, V, Cr, Mn, Fe, Co, Ni, Cu, Zn, Zr, Nb, Mo, Ru, Rh, Pd, Ag, Ta, W, Re, Os, Ir, Pt, Au;  $M_{II} =$  V, Cr, Mn, Fe, Co, Ni, Cu, Zn, Zr, Nb, Mo, Ru, Rh, Pd, Ag, Ta, W, Re, Os, Ir, Pt, Au;  $M_I \neq M_{II}$ ), the corresponding  $M_I-H$  and  $M_{II}-H$  bond lengths, and  $\Delta G_{H^*}$ .

| $M_I M_{II}/g-$ |          | The bond length for | The bond length for | $\Delta G_{H^*}$ | $E_{ad}$ |
|-----------------|----------|---------------------|---------------------|------------------|----------|
| CN              |          | $M_I-H$ (Å)         | $M_{II}-H$ (Å)      | (eV)             | (eV)     |
| $M_I$           | $M_{II}$ |                     |                     |                  |          |
| Ti              | Fe       | 1.868               | 1.706               | -0.35            | -0.53    |
| Ti              | Co       | 1.869               | 1.635               | -0.19            | -0.38    |
| Ti              | Ni       | 1.831               | 1.606               | -0.49            | -0.69    |
| Ti              | Cu       | 1.908               | 1.573               | -0.92            | -1.11    |
| Ti              | Pd       | 1.724               | -                   | -0.26            | -0.38    |
| Ti              | Pt       | 1.930               | 1.644               | -0.28            | -0.50    |
| V               | Ti       | 1.759               | 1.913               | -0.74            | -0.92    |
| V               | Fe       | 1.765               | 1.756               | -0.50            | -0.68    |
| V               | Co       | 1.801               | 1.558               | -0.49            | -0.71    |
| V               | Ni       | 1.777               | 1.591               | -0.41            | -0.62    |
| V               | Cu       | 1.816               | 1.591               | -0.55            | -0.55    |
| V               | Pd       | 1.646               | -                   | -0.15            | -0.35    |

|    |    |       |       |       |       |
|----|----|-------|-------|-------|-------|
| V  | Pt | 1.869 | 1.636 | -0.42 | -0.65 |
| Cr | Ti | 1.724 | 1.880 | -0.61 | -0.80 |
| Cr | V  | 1.745 | 1.762 | -0.68 | -0.86 |
| Cr | Mn | 1.746 | 1.683 | -0.92 | -1.12 |
| Cr | Fe | 1.735 | 1.616 | -0.80 | -1.01 |
| Cr | Co | 1.760 | 1.554 | -0.92 | -1.14 |
| Cr | Ni | 1.745 | 1.567 | -0.50 | -0.71 |
| Cr | Cu | 1.770 | 1.593 | -0.44 | -0.64 |
| Cr | Zn | 1.788 | 1.609 | -0.83 | -1.03 |
| Cr | Zr | 1.706 | -     | -0.62 | -0.80 |
| Cr | Nb | 1.745 | 1.895 | -0.66 | -0.85 |
| Cr | Mo | 1.812 | 1.785 | -0.58 | -0.78 |
| Cr | Ru | 1.911 | 1.681 | -0.68 | -0.88 |
| Cr | Rh | 1.841 | 1.649 | -0.96 | -1.18 |
| Cr | Pd | 1.778 | 1.639 | -0.16 | -0.38 |
| Cr | Ag | 1.874 | 1.697 | -0.54 | -0.71 |
| Cr | Ta | 1.789 | 1.812 | -1.04 | -1.25 |
| Cr | W  | 1.860 | 1.740 | -0.73 | -0.93 |
| Cr | Re | -     | 1.676 | -0.28 | -0.47 |
| Cr | Os | -     | 1.667 | -0.86 | -1.06 |
| Cr | Ir | 1.893 | 1.656 | -1.14 | -1.36 |
| Cr | Pt | 1.825 | 1.627 | -0.53 | -0.77 |
| Cr | Au | -     | 1.584 | -1.74 | -1.94 |
| Mn | Ti | 1.658 | 1.874 | -0.78 | -0.98 |
| Mn | V  | 1.752 | 1.779 | -0.48 | -0.67 |
| Mn | Fe | 1.714 | 1.605 | -0.82 | -1.04 |
| Mn | Co | 1.740 | 1.546 | -0.69 | -0.91 |
| Mn | Ni | 1.690 | 1.588 | -0.41 | -0.61 |
| Mn | Cu | 1.691 | 1.613 | -0.38 | -0.58 |

|    |    |       |       |       |       |
|----|----|-------|-------|-------|-------|
| Mn | Pd | 1.683 | 1.699 | -0.20 | -0.40 |
| Mn | Pt | 1.746 | 1.642 | -0.33 | -0.55 |
| Fe | Co | 1.653 | 1.565 | -0.62 | -0.84 |
| Fe | Ni | 1.621 | 1.588 | -0.39 | -0.61 |
| Fe | Cu | 1.632 | 1.622 | -0.39 | -0.60 |
| Fe | Pd | 1.616 | 1.689 | -0.24 | -0.46 |
| Fe | Pt | 1.657 | 1.656 | -0.27 | -0.50 |
| Co | Ni | 1.571 | 1.602 | -0.77 | -0.99 |
| Cu | Co | 1.632 | 1.575 | -0.37 | -0.59 |
| Cu | Ni | 1.603 | 1.575 | -0.16 | -0.37 |
| Cu | Pd | 1.621 | 1.655 | -0.02 | -0.24 |
| Cu | Pt | 1.666 | 1.652 | -0.29 | -0.52 |
| Zn | Ti | 1.587 | -     | -0.46 | -0.65 |
| Zn | V  | 1.591 | -     | -1.26 | -1.46 |
| Zn | Mn | 1.621 | 1.779 | -0.35 | -0.54 |
| Zn | Fe | 1.658 | 1.622 | -0.68 | -0.89 |
| Zn | Co | 1.672 | 1.559 | -0.85 | -1.07 |
| Zn | Ni | 1.665 | 1.574 | -0.26 | -0.47 |
| Zn | Cu | 1.657 | 1.602 | -0.43 | -0.63 |
| Zn | Pd | 1.702 | 1.664 | -0.06 | -0.26 |
| Zn | Pt | 1.791 | 1.621 | -0.31 | -0.54 |
| Zr | Ti | 1.954 | 1.857 | -1.05 | -1.24 |
| Zr | V  | 2.056 | 1.767 | -0.88 | -1.06 |
| Zr | Mn | 1.977 | 1.665 | -1.07 | -1.27 |
| Zr | Fe | 2.060 | 1.663 | -0.32 | -0.48 |
| Zr | Co | 2.063 | 1.627 | -0.05 | -0.23 |
| Zr | Ni | 1.875 | -     | -0.40 | -0.54 |
| Zr | Cu | 2.042 | 1.581 | -1.20 | -1.39 |
| Zr | Zn | -     | 1.569 | 0.24  | 0.10  |

|    |    |       |       |       |       |
|----|----|-------|-------|-------|-------|
| Zr | Nb | -     | 1.889 | -1.21 | -1.37 |
| Zr | Rh | -     | 1.648 | 0.26  | 0.08  |
| Zr | Pd | 1.882 | -     | -0.33 | -0.54 |
| Zr | Ag | 1.847 | -     | 0.36  | -0.04 |
| Zr | Ta | -     | 1.886 | -1.65 | -1.82 |
| Zr | Ir | -     | 1.643 | 0.14  | -0.08 |
| Zr | Pt | 2.050 | 1.655 | -0.18 | -0.40 |
| Zr | Au | 1.876 | -     | -0.44 | -0.69 |
| Nb | Ti | 1.862 | -     | -0.85 | -1.03 |
| Nb | V  | 1.958 | 1.816 | -0.49 | -0.67 |
| Nb | Mn | 1.927 | 1.776 | -0.45 | -0.61 |
| Nb | Fe | 1.913 | 1.781 | -0.32 | -0.49 |
| Nb | Co | 1.935 | 1.684 | -0.10 | -0.28 |
| Nb | Ni | 1.769 | -     | -0.69 | -0.85 |
| Nb | Cu | 1.909 | 1.613 | -1.06 | -1.25 |
| Nb | Zn | 1.729 | -     | -0.33 | -0.51 |
| Nb | Rh | 1.789 | -     | -0.24 | -0.38 |
| Nb | Pd | 1.779 | -     | -0.60 | -0.76 |
| Nb | Pt | 1.911 | 1.705 | -0.12 | -0.33 |
| Mo | Ti | 1.841 | -     | -0.53 | -0.70 |
| Mo | V  | 1.887 | 1.770 | -0.70 | -0.89 |
| Mo | Mn | 1.793 | -     | -0.51 | -0.67 |
| Mo | Fe | 1.809 | 1.859 | -0.48 | -0.65 |
| Mo | Co | 1.829 | 1.667 | -0.31 | -0.50 |
| Mo | Ni | 1.750 | 1.770 | -0.58 | -0.79 |
| Mo | Cu | 1.799 | 1.658 | -0.61 | -0.80 |
| Mo | Zn | 1.732 | -     | -0.24 | -0.41 |
| Mo | Zr | 1.812 | -     | -0.79 | -0.95 |
| Mo | Nb | 1.899 | 1.874 | -0.63 | -0.83 |

|    |    |       |       |       |       |
|----|----|-------|-------|-------|-------|
| Mo | Ru | -     | 1.662 | 0.09  | -0.08 |
| Mo | Rh | 1.699 | -     | -0.62 | -0.79 |
| Mo | Pd | 1.686 | -     | -0.56 | -0.74 |
| Mo | Ag | 1.677 | -     | -0.45 | -0.63 |
| Mo | Ta | 1.935 | 1.815 | -1.19 | -1.40 |
| Mo | W  | -     | 1.736 | -0.61 | -0.81 |
| Mo | Re | -     | 1.671 | -0.31 | -0.50 |
| Mo | Os | -     | 1.650 | 0.05  | -0.13 |
| Mo | Ir | 1.701 | -     | -0.62 | -0.80 |
| Mo | Pt | 1.878 | 1.685 | -0.25 | -0.46 |
| Mo | Au | 1.701 | -     | -0.44 | -0.60 |
| Ru | Ti | 1.628 | -     | -0.08 | -0.26 |
| Ru | V  | 1.644 | -     | 0     | -0.18 |
| Ru | Mn | 1.690 | 1.854 | -0.92 | -1.13 |
| Ru | Fe | 1.693 | 1.795 | -0.93 | -1.12 |
| Ru | Co | 1.705 | 1.643 | -0.76 | -0.97 |
| Ru | Ni | 1.660 | 1.694 | -0.76 | -0.97 |
| Ru | Cu | 1.634 | -     | -0.68 | -0.87 |
| Ru | Zn | 1.731 | 1.740 | -0.81 | -1.03 |
| Ru | Zr | 1.618 | -     | -0.18 | -0.38 |
| Ru | Nb | 1.619 | -     | 0.06  | -0.13 |
| Ru | Rh | 1.695 | 1.814 | -0.36 | -0.55 |
| Ru | Pd | 1.709 | 1.770 | -0.30 | -0.50 |
| Ru | Ag | 1.588 | -     | -0.37 | -0.56 |
| Ru | Ta | 1.650 | -     | 0.03  | -0.16 |
| Ru | Ir | 1.783 | 1.736 | -0.47 | -0.67 |
| Ru | Pt | 1.697 | 1.741 | -0.62 | -0.84 |
| Ru | Au | 1.577 | -     | -0.53 | -0.72 |
| Rh | Ti | 1.671 | 1.904 | -0.59 | -0.80 |



|    |    |       |       |       |       |
|----|----|-------|-------|-------|-------|
| Rh | V  | 1.659 | -     | -0.51 | -0.72 |
| Rh | Mn | 1.639 | 1.809 | -0.80 | -1.02 |
| Rh | Fe | 1.658 | 1.683 | -0.64 | -0.85 |
| Rh | Co | 1.673 | 1.618 | -0.90 | -1.13 |
| Rh | Ni | 1.658 | 1.626 | -0.85 | -1.07 |
| Rh | Cu | 1.670 | 1.666 | -0.32 | -0.53 |
| Rh | Zn | 1.655 | 1.743 | -1.12 | -1.33 |
| Rh | Pd | 1.653 | 1.732 | -0.53 | -0.74 |
| Rh | Pt | 1.693 | 1.694 | -0.75 | -0.98 |
| Pd | Co | 1.698 | 1.567 | -0.66 | -0.88 |
| Pd | Ni | 1.676 | 1.582 | 0     | -0.22 |
| Pd | Pt | 1.731 | 1.657 | -0.08 | -0.30 |
| Ag | Ti | 1.719 | -     | -0.51 | -0.68 |
| Ag | V  | 1.717 | -     | -0.70 | -0.87 |
| Ag | Mn | 1.696 | 1.906 | -0.68 | -0.84 |
| Ag | Fe | 1.732 | 1.683 | -0.35 | -0.54 |
| Ag | Co | 1.780 | 1.582 | -0.20 | -0.40 |
| Ag | Ni | 1.721 | 1.651 | -0.20 | -0.39 |
| Ag | Cu | 1.722 | 1.630 | -0.29 | -0.48 |
| Ag | Zn | 1.709 | 1.710 | -0.62 | -0.81 |
| Ag | Nb | -     | 1.755 | -0.05 | -0.21 |
| Ag | Rh | 1.759 | 1.711 | -0.38 | -0.57 |
| Ag | Pd | 2.070 | 1.571 | 0.13  | -0.09 |
| Ag | Pt | 1.766 | 1.673 | 0     | -0.21 |
| Ta | Ti | 1.850 | -     | -1.18 | -1.36 |
| Ta | V  | 1.893 | 1.853 | -0.96 | -1.15 |
| Ta | Mn | 1.880 | 1.850 | -0.67 | -0.84 |
| Ta | Fe | 1.867 | 1.901 | -0.51 | -0.67 |
| Ta | Co | 1.881 | 1.789 | -0.31 | -0.47 |

|    |    |       |       |       |       |
|----|----|-------|-------|-------|-------|
| Ta | Ni | 1.767 | -     | -0.96 | -1.13 |
| Ta | Cu | 1.900 | 1.609 | -1.05 | -1.24 |
| Ta | Zn | 1.720 | -     | -0.36 | -0.56 |
| Ta | Nb | 1.893 | -     | -1.08 | -1.26 |
| Ta | Rh | 1.785 | -     | -0.50 | -0.66 |
| Ta | Pd | 1.777 | -     | -0.94 | -1.10 |
| Ta | Ag | 1.759 | -     | -0.37 | -0.54 |
| Ta | Pt | 1.925 | 1.694 | -0.10 | -0.30 |
| W  | Ti | 1.817 | -     | -1.00 | -1.19 |
| W  | V  | 1.846 | 1.802 | -1.36 | -1.56 |
| W  | Mn | 1.743 | 1.822 | -0.38 | -0.57 |
| W  | Fe | 1.712 | -     | -0.71 | -0.88 |
| W  | Co | 1.790 | 1.665 | -0.43 | -0.62 |
| W  | Ni | 1.689 | -     | -0.92 | -1.10 |
| W  | Cu | 1.812 | 1.672 | -0.79 | -0.98 |
| W  | Zn | 1.677 | -     | -0.56 | -0.75 |
| W  | Zr | 1.801 | -     | -1.25 | -1.44 |
| W  | Nb | -     | 1.898 | -1.31 | -1.50 |
| W  | Ru | 1.712 | -     | -0.41 | -0.58 |
| W  | Rh | 1.850 | 1.724 | -0.31 | -0.51 |
| W  | Pd | 1.699 | -     | -0.92 | -1.10 |
| W  | Ag | 1.702 | -     | -0.79 | -0.98 |
| W  | Ta | -     | 1.838 | -1.66 | -1.87 |
| W  | Re | -     | 1.718 | -0.23 | -0.40 |
| W  | Os | -     | 1.705 | -0.05 | -0.23 |
| W  | Ir | 1.711 | -     | -0.90 | -1.09 |
| W  | Pt | 1.707 | -     | -0.97 | -1.16 |
| W  | Au | 1.696 | -     | -0.99 | -1.17 |
| Re | Ti | 1.674 | -     | -0.67 | -0.86 |

|    |    |       |       |       |       |
|----|----|-------|-------|-------|-------|
| Re | V  | 1.674 | -     | -0.44 | -0.64 |
| Re | Mn | 1.645 | -     | -0.44 | -0.60 |
| Re | Fe | 1.720 | -     | -0.69 | -0.84 |
| Re | Co | 1.745 | 1.710 | -0.78 | -0.97 |
| Re | Ni | 1.635 | -     | -1.01 | -1.21 |
| Re | Cu | 1.644 | -     | -0.90 | -1.09 |
| Re | Zn | 1.641 | -     | -1.23 | -1.43 |
| Re | Zr | 1.773 | 2.046 | -1.74 | -1.95 |
| Re | Nb | 1.670 | -     | -0.37 | -0.57 |
| Re | Ru | 1.790 | 1.799 | -0.30 | -0.48 |
| Re | Rh | 1.655 | -     | -1.04 | -1.23 |
| Re | Pd | 1.651 | -     | -0.78 | -0.96 |
| Re | Ag | 1.656 | -     | -0.78 | -0.97 |
| Re | Ta | 1.679 | -     | -0.36 | -0.56 |
| Re | Os | 1.659 | -     | -0.82 | -1.02 |
| Re | Ir | 1.787 | 1.775 | -0.30 | -0.50 |
| Re | Pt | 1.742 | 1.788 | -0.37 | -0.56 |
| Re | Au | 1.632 | -     | -0.60 | -0.81 |
| Os | Ti | 1.624 | -     | -0.22 | -0.41 |
| Os | V  | 1.637 | -     | -0.08 | -0.26 |
| Os | Mn | 1.690 | -     | -1.02 | -1.22 |
| Os | Fe | 1.692 | 1.864 | -1.07 | -1.27 |
| Os | Co | 1.702 | 1.709 | -0.99 | -1.20 |
| Os | Ni | 1.674 | 1.747 | -0.88 | -1.08 |
| Os | Cu | 1.685 | 1.797 | -0.83 | -1.03 |
| Os | Zn | 1.711 | -     | -0.99 | -1.19 |
| Os | Zr | 1.710 | 2.086 | -1.28 | -1.48 |
| Os | Nb | 1.735 | 1.977 | -0.83 | -1.02 |
| Os | Ru | 1.620 | -     | -0.63 | -0.82 |

|    |    |       |       |       |       |
|----|----|-------|-------|-------|-------|
| Os | Rh | 1.715 | 1.848 | -0.59 | -0.79 |
| Os | Pd | 1.604 | -     | -0.71 | -0.90 |
| Os | Ag | 1.619 | -     | -0.67 | -0.85 |
| Os | Ta | 1.635 | -     | 0.05  | -0.14 |
| Os | Ir | 1.745 | 1.773 | -0.66 | -0.87 |
| Os | Pt | 1.701 | 1.777 | -0.69 | -0.91 |
| Os | Au | 1.607 | -     | -0.88 | -1.06 |
| Ir | Ti | 1.665 | -     | -0.85 | -1.07 |
| Ir | V  | 1.657 | -     | -0.78 | -1.00 |
| Ir | Mn | 1.646 | 1.874 | -0.97 | -1.19 |
| Ir | Fe | 1.655 | 1.743 | -0.81 | -1.02 |
| Ir | Co | 1.681 | 1.648 | -0.98 | -1.20 |
| Ir | Ni | 1.665 | 1.663 | -0.98 | -1.20 |
| Ir | Cu | 1.671 | 1.713 | -0.48 | -0.70 |
| Ir | Zn | 1.655 | 1.823 | -1.30 | -1.52 |
| Ir | Nb | 1.693 | -     | 0.26  | 0.07  |
| Ir | Rh | 1.707 | 1.752 | -1.00 | -1.21 |
| Ir | Pd | 1.660 | 1.766 | -0.65 | -0.87 |
| Ir | Ag | 1.632 | -     | -0.21 | -0.41 |
| Ir | Ta | 1.739 | -     | 0.19  | 0.02  |
| Ir | Pt | 1.693 | 1.726 | -0.80 | -1.02 |
| Pt | Co | 1.668 | 1.608 | -0.87 | -1.10 |
| Pt | Ni | 1.656 | 1.626 | -0.19 | -0.42 |
| Au | Ti | -     | 1.718 | -0.13 | -0.45 |
| Au | V  | 1.580 | -     | -1.18 | -1.38 |
| Au | Mn | 1.579 | -     | -0.51 | -0.71 |
| Au | Fe | -     | 1.542 | 0.02  | -0.16 |
| Au | Co | 1.797 | 1.565 | 0.05  | -0.15 |
| Au | Ni | 1.615 | -     | 0.08  | -0.12 |

|    |    |       |       |       |       |
|----|----|-------|-------|-------|-------|
| Au | Cu | 1.628 | 1.812 | -0.43 | -0.63 |
| Au | Zn | 1.599 | -     | -0.68 | -0.88 |
| Au | Nb | -     | 1.772 | -0.63 | -0.78 |
| Au | Rh | 1.843 | 1.640 | -0.09 | -0.29 |
| Au | Pd | 1.569 | -     | 0.19  | -0.01 |
| Au | Ag | 1.568 | -     | -1.15 | -1.36 |
| Au | Ta | -     | 1.770 | -0.97 | -1.14 |
| Au | Ir | -     | 1.586 | -0.13 | -0.30 |
| Au | Pt | 1.812 | 1.664 | 0.56  | 0.35  |

**Table S8.** The adsorption energies ( $E_{ad}$ ) for OH on possible sites in  $M_I M_{II}/g\text{-CN}$  ( $M_I = \text{Fe, Co, Ni, Cu, Zn, Mo, Ru, Rh, Pd, Ag, Re, Os, Ir, Pt, Au}$ ;  $M_{II} = \text{Co, Ni, Cu, Zn, Mo, Ru, Rh, Pd, Ag, Re, Os, Ir, Pt, Au}$ ;  $M_I \neq M_{II}$ ), the corresponding  $M_I\text{-OH}$  and  $M_{II}\text{-OH}$  bond lengths, and the Gibbs free energy change for OH adsorption ( $\Delta G_{OH^*}$ ).

| $M_I$ | $M_{II}$ | $E_{ad}$<br>(eV) | The bond length<br>for $M_I\text{-OH}$ (Å) | The bond length for<br>$M_{II}\text{-OH}$ (Å) | $\Delta G_{OH^*}$<br>(eV) | $\Delta G_{OH^*}$<br>under<br>solvation<br>correction<br>(eV) |
|-------|----------|------------------|--------------------------------------------|-----------------------------------------------|---------------------------|---------------------------------------------------------------|
| Fe    | Co       | -0.85            | 1.921                                      | 1.930                                         | -0.51                     | -0.81                                                         |
| Fe    | Ni       | -0.59            | 1.883                                      | 1.965                                         | -0.24                     | -0.54                                                         |
| Fe    | Cu       | -0.49            | 1.867                                      | 1.998                                         | -0.14                     | -0.44                                                         |
| Fe    | Pd       | 0.00             | 1.816                                      | -                                             | 0.25                      | -0.05                                                         |
| Fe    | Pt       | 0.03             | 1.906                                      | 2.064                                         | 0.41                      | 0.11                                                          |
| Co    | Ni       | -0.69            | 1.858                                      | 1.910                                         | -0.31                     | -0.61                                                         |
| Cu    | Co       | -0.45            | 1.968                                      | 1.863                                         | -0.09                     | -0.39                                                         |
| Cu    | Ni       | 0.06             | 1.936                                      | 1.892                                         | 0.41                      | 0.11                                                          |
| Cu    | Pd       | 0.48             | 1.917                                      | 2.073                                         | 0.82                      | 0.52                                                          |

|    |    |       |       |       |       |       |
|----|----|-------|-------|-------|-------|-------|
| Cu | Pt | 0.33  | 2.012 | 2.053 | 0.67  | 0.37  |
| Zn | Fe | -0.80 | 2.059 | 1.897 | -0.46 | -0.76 |
| Zn | Co | -1.14 | 1.994 | 1.869 | -0.78 | -1.08 |
| Zn | Ni | -0.29 | 1.948 | 1.929 | 0.01  | -0.29 |
| Zn | Cu | -0.63 | 1.950 | 1.888 | -0.16 | -0.46 |
| Zn | Pd | 0.25  | 1.971 | 2.139 | 0.70  | 0.40  |
| Zn | Pt | 0.13  | 2.012 | 2.065 | 0.43  | 0.13  |
| Mo | Fe | -1.32 | 1.989 | 2.220 | -1.02 | -1.32 |
| Mo | Co | -1.43 | 1.898 | -     | -1.15 | -1.45 |
| Mo | Ni | -1.49 | 1.866 | -     | -1.22 | -1.52 |
| Mo | Cu | -1.49 | 1.870 | -     | -1.21 | -1.51 |
| Mo | Zn | -1.26 | 1.905 | -     | -0.98 | -1.28 |
| Mo | Ru | -1.02 | 1.918 | -     | -0.73 | -1.03 |
| Mo | Rh | -1.39 | 1.909 | -     | -1.11 | -1.41 |
| Mo | Pd | -1.62 | 1.894 | -     | -1.33 | -1.63 |
| Mo | Ag | -1.41 | 1.878 | -     | -1.11 | -1.41 |
| Mo | Re | -0.77 | 2.146 | 2.055 | -1.02 | -1.32 |
| Mo | Os | -1.23 | 1.904 | -     | -0.92 | -1.22 |
| Mo | Ir | -1.44 | 1.905 | -     | -1.14 | -1.44 |
| Mo | Pt | -0.10 | 2.029 | 2.065 | 0.27  | -0.03 |
| Mo | Au | -1.55 | 1.865 | -     | -1.27 | -1.57 |
| Ru | Fe | -1.21 | 2.039 | 2.014 | -0.85 | -1.15 |
| Ru | Co | -0.97 | 2.010 | 1.956 | -0.61 | -0.91 |
| Ru | Ni | -0.77 | 1.998 | 2.008 | -0.42 | -0.72 |
| Ru | Cu | -0.61 | 2.007 | 2.033 | -0.26 | -0.56 |
| Ru | Zn | -1.23 | 2.034 | 2.111 | -0.88 | -1.18 |
| Ru | Rh | -0.48 | 2.031 | 2.027 | -0.11 | -0.41 |
| Ru | Pd | -0.62 | 1.915 | -     | -0.31 | -0.61 |
| Ru | Ag | -0.61 | 1.925 | -     | -0.30 | -0.60 |

|    |    |       |       |       |       |       |
|----|----|-------|-------|-------|-------|-------|
| Ru | Ir | -0.45 | 2.041 | 2.035 | -0.08 | -0.38 |
| Ru | Pt | -0.11 | 2.044 | 2.037 | 0.26  | -0.04 |
| Ru | Au | -0.12 | 1.931 | -     | 0.19  | -0.11 |
| Rh | Fe | -0.74 | 2.039 | 1.910 | -0.37 | -0.67 |
| Rh | Co | -1.00 | 2.013 | 1.860 | -0.62 | -0.92 |
| Rh | Ni | -0.49 | 2.018 | 1.927 | -0.13 | -0.43 |
| Rh | Cu | -0.10 | 2.030 | 1.971 | 0.25  | -0.05 |
| Rh | Zn | -1.20 | 2.046 | 2.014 | -0.85 | -1.15 |
| Rh | Pd | 0.24  | 1.991 | 2.227 | 0.59  | 0.29  |
| Rh | Pt | 0.09  | 2.023 | 2.039 | 0.46  | 0.16  |
| Pd | Co | -0.26 | 2.046 | 1.840 | 0.12  | -0.18 |
| Pd | Ni | 0.68  | 2.046 | 1.891 | 1.04  | 0.74  |
| Pd | Pt | 1.15  | 2.215 | 2.039 | 1.50  | 1.20  |
| Ag | Fe | -0.57 | -     | 1.816 | -0.25 | -0.55 |
| Ag | Co | -0.28 | -     | 1.797 | 0.05  | -0.25 |
| Ag | Ni | -0.20 | -     | 1.787 | 0.08  | -0.22 |
| Ag | Cu | -0.37 | 2.405 | 1.815 | -0.06 | -0.36 |
| Ag | Zn | -0.65 | 2.116 | 1.967 | -0.31 | -0.61 |
| Ag | Rh | -0.29 | -     | 1.957 | 0.04  | -0.26 |
| Ag | Pd | 0.42  | -     | 1.973 | 0.75  | 0.45  |
| Ag | Pt | 0.80  | 2.069 | 2.122 | 1.15  | 0.85  |
| Re | Fe | -1.03 | 1.993 | 2.199 | -0.74 | -1.04 |
| Re | Co | -1.27 | 1.913 | -     | -0.99 | -1.29 |
| Re | Ni | -1.26 | 1.904 | -     | -0.95 | -1.25 |
| Re | Cu | -1.39 | 1.918 | -     | -1.09 | -1.39 |
| Re | Zn | -1.82 | 1.913 | -     | -1.53 | -1.83 |
| Re | Ru | -0.13 | 2.040 | 2.086 | 0.23  | -0.07 |
| Re | Rh | -1.54 | 1.922 | -     | -1.24 | -1.54 |
| Re | Pd | -1.31 | 1.906 | -     | -1.00 | -1.30 |

|    |    |       |       |       |       |       |
|----|----|-------|-------|-------|-------|-------|
| Re | Ag | -1.40 | 1.918 | -     | -1.11 | -1.41 |
| Re | Os | -1.06 | 1.937 | -     | -1.06 | -1.36 |
| Re | Ir | -0.12 | 2.048 | 2.068 | 0.25  | -0.05 |
| Re | Pt | -1.40 | 1.909 | -     | -1.08 | -1.38 |
| Re | Au | -1.12 | 1.901 | -     | -0.81 | -1.11 |
| Os | Fe | -1.23 | 2.042 | 2.046 | -0.88 | -1.18 |
| Os | Co | -0.97 | 2.012 | 1.995 | -0.62 | -0.92 |
| Os | Ni | -0.79 | 1.997 | 2.066 | -0.45 | -0.75 |
| Os | Cu | -0.85 | 1.995 | 2.113 | -0.51 | -0.81 |
| Os | Zn | -1.41 | 2.012 | 2.252 | -1.07 | -1.37 |
| Os | Ru | -0.43 | 2.035 | 2.126 | -0.08 | -0.38 |
| Os | Rh | -0.86 | 1.926 | -     | -0.54 | -0.84 |
| Os | Pd | -0.91 | 1.922 | -     | -0.59 | -0.89 |
| Os | Ag | -0.99 | 1.935 | -     | -0.66 | -0.96 |
| Os | Ir | -0.81 | 1.928 | -     | -0.49 | -0.79 |
| Os | Pt | -1.05 | 1.919 | -     | -0.72 | -1.02 |
| Os | Au | -0.73 | 1.933 | -     | -0.41 | -0.71 |
| Ir | Fe | -0.64 | 2.043 | 1.932 | -0.27 | -0.57 |
| Ir | Co | -0.89 | 2.014 | 1.895 | -0.51 | -0.81 |
| Ir | Ni | -0.52 | 2.023 | 1.956 | -0.15 | -0.45 |
| Ir | Cu | -0.18 | 2.028 | 2.020 | 0.17  | -0.13 |
| Ir | Zn | -1.26 | 2.051 | 2.059 | -0.90 | -1.20 |
| Ir | Rh | -0.75 | 2.004 | 2.046 | -0.37 | -0.67 |
| Ir | Pd | 0.16  | 1.999 | 2.351 | 0.50  | 0.20  |
| Ir | Ag | -0.26 | 1.969 | -     | 0.07  | -0.23 |
| Ir | Pt | 0.17  | 2.018 | 2.074 | 0.55  | 0.25  |
| Pt | Co | -0.33 | 2.040 | 1.859 | 0.05  | -0.25 |
| Pt | Ni | 0.64  | 2.048 | 1.932 | 1.01  | 0.71  |
| Au | Fe | 0.08  | -     | 1.829 | 0.24  | -0.06 |



|    |    |       |       |       |       |       |
|----|----|-------|-------|-------|-------|-------|
| Au | Co | 0.46  | -     | 1.844 | 0.75  | 0.45  |
| Au | Ni | 1.02  | -     | 1.912 | 1.33  | 1.03  |
| Au | Cu | -0.14 | 2.038 | 1.963 | 0.21  | -0.09 |
| Au | Zn | 0.20  | -     | 1.843 | 0.48  | 0.18  |
| Au | Rh | 0.58  | -     | 1.974 | 0.90  | 0.60  |
| Au | Pd | 1.39  | -     | 2.009 | 1.71  | 1.41  |
| Au | Ag | -0.73 | 1.961 | -     | -0.44 | -0.74 |
| Au | Ir | 0.47  | -     | 1.991 | 0.79  | 0.49  |
| Au | Pt | 1.34  | -     | 2.041 | 1.64  | 1.34  |

**Table S9.** The adsorption energies ( $E_{ad}$ ) for  $I^*$  ( $I=O$ ,  $OH$ ,  $OOH$ ) on possible sites in  $M_I M_{II}/g-CN$  ( $M_I M_{II} = FePd, FePt, CuNi, CuPd, CuPt, ZnNi, ZnPd, ZnPt, MoPt, RuPt, RuAu, RhCu, RhPd, RhPt, PdCo, PdNi, PdPt, AgCo, AgNi, AgCu, AgRh, AgPd, AgPt, ReIr, IrCu, IrPd, IrAg, IrPt, PtCo, PtNi, AuFe, AuCo, AuNi, AuCu, AuZn, AuRh, AuPd, AuIr, AuPt$ ), and the corresponding  $M_I-I$  and  $M_{II}-I$  bond lengths.

| $M_I M_{II}/g-CN$ |          | $E_{ad}-I^*$ (eV) |       |        | The bond length for $M_I-I$ (Å) |       |        | The bond length for $M_{II}-I$ (Å) |       |        |
|-------------------|----------|-------------------|-------|--------|---------------------------------|-------|--------|------------------------------------|-------|--------|
| $M_I$             | $M_{II}$ | $I=OH$            | $I=O$ | $I=OO$ | $I=O$                           | $I=O$ | $I=OO$ | $I=O$                              | $I=O$ | $I=OO$ |
|                   |          |                   |       | H      | H                               |       | H      | H                                  |       | H      |
| Fe                | Pd       | 0.70              | 0.00  | 3.01   | 1.816                           | 1.701 | 1.705  | -                                  | 1.993 | -      |
| Fe                | Pt       | 0.03              | 0.70  | 1.46   | 1.906                           | 1.723 | 1.743  | 2.064                              | 1.985 | 1.986  |
| Cu                | Ni       | 0.06              | 1.35  | 3.13   | 1.936                           | 1.804 | 1.940  | 1.892                              | 1.729 | 1.875  |
| Cu                | Pd       | 0.48              | 1.81  | 3.83   | 1.917                           | 1.783 | 1.832  | 2.073                              | 1.918 | -      |
| Cu                | Pt       | 0.33              | 1.59  | 3.47   | 2.012                           | 1.850 | 2.070  | 2.053                              | 1.923 | 2.034  |
| Zn                | Ni       | -0.29             | 0.82  | 3.03   | 1.948                           | 1.847 | 1.999  | 1.929                              | 1.746 | 1.881  |
| Zn                | Pd       | 0.25              | 1.55  | 3.46   | 1.971                           | 1.828 | 2.029  | 2.139                              | 1.932 | 2.121  |
| Zn                | Pt       | 0.13              | 1.36  | 3.37   | 2.012                           | 1.860 | 2.064  | 2.065                              | 1.945 | 2.049  |
| Mo                | Pt       | -0.10             | -1.90 | -1.99  | 2.029                           | 1.693 | 1.700  | 2.065                              | -     | -      |

|    |    |       |       |       |       |       |       |       |       |       |
|----|----|-------|-------|-------|-------|-------|-------|-------|-------|-------|
| Ru | Pt | -0.11 | 0.51  | 1.26  | 2.044 | 1.861 | 1.873 | 2.037 | 1.970 | 1.982 |
| Ru | Au | -0.12 | 0.88  | 2.48  | 1.931 | 1.867 | 1.840 | -     | 2.009 | -     |
| Rh | Cu | -0.10 | 1.21  | 3.03  | 2.030 | 1.857 | 1.981 | 1.971 | 1.873 | 1.999 |
| Rh | Pd | 0.23  | 1.28  | 3.38  | 1.991 | 1.877 | 1.948 | 2.227 | 1.930 | -     |
| Rh | Pt | 0.09  | 1.01  | 1.94  | 2.023 | 1.895 | 1.882 | 2.039 | 1.938 | 1.932 |
| Pd | Co | -0.26 | 0.83  | 2.92  | 2.046 | 1.939 | 2.043 | 1.840 | 1.723 | 1.792 |
| Pd | Ni | 0.68  | 1.64  | 3.84  | 2.046 | 1.916 | 2.037 | 1.891 | 1.751 | 1.887 |
| Pd | Pt | 1.15  | 1.89  | 4.44  | 2.215 | 1.933 | -     | 2.039 | 1.927 | 2.038 |
| Ag | Co | -0.28 | 1.04  | 2.73  | -     | 2.072 | -     | 1.797 | 1.717 | 1.757 |
| Ag | Ni | -0.20 | 1.34  | 2.89  | -     | 2.078 | -     | 1.787 | 1.705 | 1.779 |
| Ag | Cu | -0.37 | 1.70  | 2.91  | 2.405 | 2.022 | -     | 1.815 | 1.773 | 1.811 |
| Ag | Rh | -0.29 | 1.36  | 2.64  | -     | 2.035 | -     | 1.957 | 1.858 | 1.913 |
| Ag | Pd | 0.42  | 2.37  | 3.47  | -     | 2.392 | -     | 1.973 | 1.851 | 1.964 |
| Ag | Pt | 0.80  | 2.05  | 4.10  | 2.069 | 2.000 | 2.066 | 2.122 | 1.916 | -     |
| Re | Ir | -0.12 | -1.12 | -0.45 | 2.048 | 1.721 | 1.843 | 2.068 | -     | 2.048 |
| Ir | Cu | -0.18 | 0.85  | 2.94  | 2.028 | 1.863 | 1.976 | 2.020 | 1.920 | 2.055 |
| Ir | Pd | 0.16  | 1.10  | 3.31  | 1.999 | 1.881 | 1.936 | 2.351 | 1.960 | -     |
| Ir | Ag | -0.26 | 1.06  | 2.68  | 1.969 | 1.796 | 1.921 | -     | -     | -     |
| Ir | Pt | 0.17  | 0.93  | 1.72  | 2.018 | 1.898 | 1.947 | 2.074 | 1.963 | 1.948 |
| Pt | Co | -0.33 | 0.66  | 2.87  | 2.040 | 1.947 | 2.024 | 1.859 | 1.734 | 1.809 |
| Pt | Ni | 0.64  | 1.49  | 3.82  | 2.048 | 1.927 | 2.032 | 1.932 | 1.766 | 1.917 |
| Au | Fe | 0.01  | 1.18  | 2.92  | -     | -     | -     | 1.829 | 1.656 | 1.770 |
| Au | Co | 0.46  | 1.94  | 3.44  | -     | 2.104 | -     | 1.844 | 1.722 | 1.838 |
| Au | Ni | 1.02  | 2.28  | 4.02  | -     | 1.961 | -     | 1.912 | 1.753 | 1.876 |
| Au | Cu | -0.14 | 1.46  | 3.89  | 2.038 | 1.949 | -     | 1.963 | 1.814 | 1.807 |
| Au | Zn | 0.20  | 0.83  | 3.52  | -     | 1.955 | -     | 1.843 | 1.846 | 1.884 |
| Au | Rh | 0.58  | 1.72  | 3.54  | -     | 1.960 | -     | 1.974 | 1.926 | 1.949 |
| Au | Pd | 1.39  | 2.74  | 3.99  | -     | 1.959 | 1.974 | 2.009 | 1.918 | -     |
| Au | Ir | 0.47  | 1.81  | 3.46  | -     | 2.258 | -     | 1.991 | 1.856 | 1.953 |

Au Pt 1.34 2.74 4.74 - 1.973 2.709 2.041 1.934 -

**Table S10.** The Gibbs free energy change for oxygenated intermediates adsorption ( $\Delta G_{O^*}$ ,  $\Delta G_{OH^*}$ ,  $\Delta G_{OOH^*}$ ) on  $M_I M_{II}/g\text{-CN}$  ( $M_I M_{II} = \text{FePd, FePt, CuNi, CuPd, CuPt, ZnNi, ZnPd, ZnPt, MoPt, RuPt, RuAu, RhCu, RhPd, RhPt, PdCo, PdNi, PdPt, AgCo, AgNi, AgCu, AgRh, AgPd, AgPt, ReIr, IrCu, IrPd, IrAg, IrPt, PtCo, PtNi, AuFe, AuCo, AuNi, AuCu, AuZn, AuRh, AuPd, AuIr, AuPt}$ ), the overpotentials for OER ( $\eta^{\text{OER}}$ ), and the overpotentials for ORR ( $\eta^{\text{ORR}}$ ).

| $M_I M_{II}/g\text{-CN}$ |          | $\Delta G_{OH^*}$ (eV) | $\Delta G_{O^*}$ (eV) | $\Delta G_{OOH^*}$ | $\eta^{\text{OER}}$ (V) | $\eta^{\text{ORR}}$ (V) |  |
|--------------------------|----------|------------------------|-----------------------|--------------------|-------------------------|-------------------------|--|
| $M_I$                    | $M_{II}$ | (eV)                   |                       |                    |                         |                         |  |
| Fe                       | Pd       | 0.25                   | 0.77                  | 3.32               | 1.33                    | 0.98                    |  |
| Fe                       | Pt       | 0.41                   | 0.77                  | 1.92               | 1.77                    | 0.87                    |  |
| Cu                       | Ni       | 0.41                   | 1.41                  | 3.47               | 0.83                    | 0.82                    |  |
| Cu                       | Pd       | 0.82                   | 1.87                  | 4.16               | 1.06                    | 0.47                    |  |
| Cu                       | Pt       | 0.67                   | 1.64                  | 3.85               | 0.97                    | 0.56                    |  |
| Zn                       | Ni       | 0.06                   | 0.88                  | 3.38               | 1.28                    | 1.17                    |  |
| Zn                       | Pd       | 0.70                   | 1.61                  | 3.83               | 0.99                    | 0.53                    |  |
| Zn                       | Pt       | 0.49                   | 1.42                  | 3.76               | 1.11                    | 0.74                    |  |
| Mo                       | Pt       | 0.27                   | -1.87                 | -1.61              | 5.30                    | 3.37                    |  |
| Ru                       | Pt       | 0.26                   | 0.58                  | 1.72               | 1.97                    | 0.97                    |  |
| Ru                       | Au       | 0.19                   | 0.94                  | 2.78               | 0.91                    | 1.04                    |  |
| Rh                       | Cu       | 0.25                   | 1.27                  | 3.39               | 0.89                    | 0.98                    |  |
| Rh                       | Pd       | 0.59                   | 1.35                  | 3.72               | 1.14                    | 0.64                    |  |
| Rh                       | Pt       | 0.46                   | 1.08                  | 2.37               | 1.32                    | 0.77                    |  |
| Pd                       | Co       | 0.12                   | 0.90                  | 3.30               | 1.17                    | 1.11                    |  |

---

|    |    |       |       |       |      |      |
|----|----|-------|-------|-------|------|------|
| Pd | Ni | 1.04  | 1.71  | 4.22  | 1.28 | 0.56 |
| Pd | Pt | 1.50  | 1.96  | 4.80  | 1.61 | 1.11 |
| Ag | Co | 0.05  | 1.09  | 3.08  | 0.77 | 1.18 |
| Ag | Ni | 0.08  | 1.37  | 3.21  | 0.61 | 1.15 |
| Ag | Cu | -0.06 | 1.73  | 3.25  | 0.56 | 1.29 |
| Ag | Rh | 0.04  | 1.41  | 2.98  | 0.71 | 1.19 |
| Ag | Pd | 0.75  | 2.41  | 3.83  | 0.43 | 0.48 |
| Ag | Pt | 1.15  | 2.10  | 4.40  | 1.06 | 0.71 |
| Re | Ir | 0.25  | -1.07 | -0.05 | 3.74 | 2.55 |
| Ir | Cu | 0.17  | 0.91  | 3.26  | 1.16 | 1.06 |
| Ir | Pd | 0.50  | 1.17  | 3.63  | 1.23 | 0.73 |
| Ir | Ag | 0.07  | 1.09  | 3.03  | 0.71 | 1.16 |
| Ir | Pt | 0.55  | 1.00  | 2.11  | 1.58 | 0.78 |
| Pt | Co | 0.05  | 0.73  | 3.24  | 1.28 | 1.18 |
| Pt | Ni | 1.01  | 1.57  | 4.20  | 1.40 | 0.67 |
| Au | Fe | 0.24  | 1.22  | 3.22  | 0.78 | 0.99 |
| Au | Co | 0.75  | 2.00  | 3.75  | 0.52 | 0.48 |
| Au | Ni | 1.33  | 2.35  | 4.35  | 0.76 | 0.66 |
| Au | Cu | 0.21  | 1.51  | 4.21  | 1.47 | 1.02 |
| Au | Zn | 0.48  | 0.88  | 3.83  | 1.72 | 0.83 |
| Au | Rh | 0.90  | 1.78  | 3.86  | 0.85 | 0.35 |
| Au | Pd | 1.71  | 2.81  | 4.32  | 0.48 | 0.63 |
| Au | Ir | 0.78  | 1.86  | 3.79  | 0.70 | 0.44 |
| Au | Pt | 1.64  | 2.81  | 4.99  | 0.95 | 1.30 |

---

**Table S11.** The initial data set of intrinsic descriptors including the distance of two metal atoms ( $L$ , Å), the average bond lengths between the surrounding N atoms and metal atoms ( $\bar{d}$ , Å), the covalent radius ( $R_{cov-ul}$ ,  $R_{cov-lr}$ , Å), the number of valance electrons ( $N_{va-ul}$ ,  $N_{va-lr}$ ), the number of d electrons ( $N_{d-ul}$ ,  $N_{d-lr}$ ), the Pauling electronegativity ( $E_{p-ul}$ ,  $E_{p-dr}$ ), the first ionization energy ( $E_{I-ul}$ ,  $E_{I-dr}$ , eV), the electron affinity ( $A_{e-ul}$ ,  $A_{e-dr}$ , eV), and the d-band center ( $\epsilon_{d-ul}$ ,  $\epsilon_{d-dr}$ , eV) for 23 homonuclear and 253 heteronuclear metal dimers adsorbed on g-CN. Herein, -ul and -lr denote the characteristics for metal atoms situated at the upper left and the down right sites of g-CN, respectively.

|                | M | L | $\bar{d}$ | R | R | N | N | N | N | E | E | E | E | A | A | $\epsilon_d$ | $\epsilon_d$ | $E_{p-ul}$ | $ E_{p-ul} - E_{p-lr} $ | $R_{cov-ul}$ | $R_{cov-lr}$ |
|----------------|---|---|-----------|---|---|---|---|---|---|---|---|---|---|---|---|--------------|--------------|------------|-------------------------|--------------|--------------|
|                |   |   |           |   |   |   |   |   |   |   |   |   |   |   |   |              |              |            |                         |              |              |
| T              | 1 | 2 |           |   |   |   |   |   |   | 1 | 1 | 6 | 6 | 0 | 0 | 2            | 2            |            |                         |              |              |
| i <sub>2</sub> | 9 | 1 | 1         | 1 | 4 | 4 | 2 | 2 | 5 | 5 | 8 | 8 | 0 | 0 | 3 | 3            | 3.08         | 0          | 3.2                     | 0            |              |
|                | 7 | 2 | 6         | 6 |   |   |   |   | 4 | 4 | 2 | 2 | 7 | 7 | 2 | 2            |              |            |                         |              |              |
|                | 5 | 3 |           |   |   |   |   |   |   |   | 7 | 7 | 9 | 9 | 3 | 4            |              |            |                         |              |              |

|                |   |   |   |   |   |   |   |   |   |   |   |   |   |   |   |   |    |   |    |   |
|----------------|---|---|---|---|---|---|---|---|---|---|---|---|---|---|---|---|----|---|----|---|
| V              | 1 | 2 | 1 | 1 |   |   |   |   | 1 | 1 | 6 | 6 | 0 | 0 | 0 | 0 |    |   |    |   |
|                | . | . | . | . | 5 | 5 | 3 | 3 | . | . | . | . | . | . | . | . | 3. | 0 | 3. | 0 |
| 2              | 8 | 1 | 5 | 5 |   |   |   |   | 6 | 6 | 7 | 7 | 5 | 5 | 9 | 9 | 26 |   | 06 |   |
|                | 3 | 1 | 3 | 3 |   |   |   |   | 3 | 3 | 4 | 4 | 2 | 2 | 2 | 1 |    |   |    |   |
|                |   | 9 |   |   |   |   |   |   |   |   | 6 | 6 | 5 | 5 | 1 | 9 |    |   |    |   |
| C              | 2 | 2 | 1 | 1 |   |   |   |   | 1 | 1 | 6 | 6 | 0 | 0 | - | - |    |   |    |   |
|                | . | . | . | . | 6 | 6 | 5 | 5 | . | . | . | . | . | . | 0 | 0 |    |   |    |   |
| r <sub>2</sub> | 0 | . | . | . |   |   |   |   | 6 | 6 | . | . | . | . | . | . | 3. | 0 | 2. | 0 |
|                | 7 | 0 | 3 | 3 |   |   |   |   | 6 | 6 | 7 | 7 | 6 | 6 | . | . | 32 |   | 78 |   |
|                | 8 | 5 | 9 | 9 |   |   |   |   |   |   | 6 | 6 | 6 | 6 | 8 | 8 |    |   |    |   |
|                |   | 9 |   |   |   |   |   |   |   |   | 6 | 6 | 6 | 6 | 9 | 9 |    |   |    |   |
|                |   |   |   |   |   |   |   |   |   |   |   |   |   |   | 1 | 3 |    |   |    |   |
| M              | 2 |   |   |   |   |   |   |   | 1 | 1 | 7 | 7 |   |   | - | - |    |   |    |   |
|                | . | 1 | 1 | 1 |   |   |   |   | . | . | . | . |   |   | 0 | 0 |    |   |    |   |
| n              | 3 | . | . | . | 7 | 7 | 5 | 5 | 5 | 5 | . | . | 0 | 0 | . | . | 3. | 0 | 2. | 0 |
|                | 9 | 9 | 3 | 3 |   |   |   |   | 5 | 5 | 4 | 4 | 0 | 0 | 6 | 6 | 1  |   | 78 |   |
| 2              | 5 | 8 | 9 | 9 |   |   |   |   |   |   | 3 | 3 |   |   | 0 | 2 |    |   |    |   |
|                |   | 9 |   |   |   |   |   |   |   |   | 4 | 4 |   |   | 7 | 0 |    |   |    |   |
| F              | 2 |   |   |   |   |   |   |   | 1 | 1 | 7 | 7 | 0 | 0 | - | - |    |   |    |   |
|                | . | 1 | 1 | 1 |   |   |   |   | . | . | . | . | . | . | 0 | 0 |    |   |    |   |
| e <sub>2</sub> | 1 | 0 | . | . | 8 | 8 | 6 | 6 | 8 | 8 | 9 | 9 | 1 | 1 | . | . | 3. | 0 | 2. | 0 |
|                | 9 | 2 | 3 | 3 |   |   |   |   | 3 | 3 | 0 | 0 | 5 | 5 | 8 | 8 | 66 |   | 64 |   |
|                | 1 | 2 | 2 | 2 |   |   |   |   |   |   | 2 | 2 | 1 | 1 | 2 | 2 |    |   |    |   |
|                |   | 3 |   |   |   |   |   |   |   |   |   |   |   |   | 3 | 3 |    |   |    |   |
| C              | 2 |   |   |   |   |   |   |   | 1 | 1 |   |   | 0 | 0 | - | - |    |   |    |   |
|                | . | 1 | 1 | 1 |   |   |   |   | . | . | 7 | 7 |   |   | 1 | 1 |    |   |    |   |
| o              | 2 | . | . | . | 9 | 9 | 7 | 7 | 8 | 8 | . | . | . | . | . | . | 3. | 0 | 2. | 0 |
|                | 5 | 8 | 2 | 2 |   |   |   |   | 8 | 8 | 8 | 8 | 6 | 6 | 1 | 1 | 76 |   | 52 |   |
| 2              | 3 | 8 | 6 | 6 |   |   |   |   |   |   | 8 | 8 | 2 | 2 | 7 | 7 |    |   |    |   |
|                |   |   |   |   |   |   |   |   |   |   |   |   |   |   | 8 | 8 |    |   |    |   |
| N              | 2 |   |   |   |   |   |   |   | 1 | 1 | 7 | 7 | 1 | 1 | - | - |    |   |    |   |
|                | . | 1 | 1 | 1 |   |   |   |   | . | . | . | . | . | . | 1 | 1 |    |   |    |   |
| i <sub>2</sub> | 4 | . | . | . | 1 | 1 | 8 | 8 | 9 | 9 | . | . | . | . | . | . | 3. | 0 | 2. | 0 |
|                | 0 | 9 | 2 | 2 | 0 | 0 |   |   | 1 | 1 | 6 | 6 | 1 | 1 | . | . | 82 |   | 48 |   |
|                | 3 | 5 | 4 | 4 |   |   |   |   |   |   | 3 | 3 | 5 | 5 | 7 | 7 |    |   |    |   |
|                |   | 9 |   |   |   |   |   |   |   |   | 9 | 9 | 6 | 6 | 7 | 7 |    |   |    |   |
|                |   |   |   |   |   |   |   |   |   |   |   |   |   |   | 8 | 7 |    |   |    |   |
| C              | 2 |   |   |   |   |   |   |   | 1 | 1 | 7 | 7 | 1 | 1 | - | - |    |   |    |   |
|                | . | 2 | 1 | 1 |   |   |   |   | . | . | . | . | . | . | 2 | 2 |    |   |    |   |
| u              | 3 | . | . | . | 1 | 1 | 1 | 1 | 9 | 9 | . | . | . | . | . | . | 3. | 0 | 2. | 0 |
|                | 7 | 0 | 3 | 3 | 1 | 1 | 0 | 0 |   |   | 7 | 7 | 2 | 2 | . | . | 8  |   | 64 |   |
| 2              | 9 | 3 | 2 | 2 |   |   |   |   |   |   | 2 | 2 | 3 | 3 | 3 | 3 |    |   |    |   |
|                |   | 0 |   |   |   |   |   |   |   |   | 6 | 6 | 5 | 5 | 3 | 1 |    |   |    |   |
|                |   |   |   |   |   |   |   |   |   |   |   |   |   |   | 6 | 9 |    |   |    |   |
| Z              | 2 | 2 | 1 | 1 | 1 | 1 | 1 | 1 | 1 | 1 | 9 | 9 |   |   | - | - | 3. | 0 | 2. | 0 |
|                | . | . | . | . | 2 | 2 | 0 | 0 | . | . | . | . | 0 | 0 | 6 | 6 | 3  |   | 44 |   |
|                | 2 | 3 | 2 | 2 |   |   |   |   | 6 | 6 | 3 | 3 |   |   | . | . |    |   |    |   |

|                |   |   |   |   |   |   |   |   |   |   |   |   |   |   |   |   |    |    |
|----------------|---|---|---|---|---|---|---|---|---|---|---|---|---|---|---|---|----|----|
| n              | 4 | 2 | 2 | 2 |   |   |   |   | 5 | 5 | 9 | 9 |   |   | 1 | 1 |    |    |
|                | 3 | 0 |   |   |   |   |   |   |   |   | 4 | 4 |   |   | 9 | 9 |    |    |
| 2              |   |   |   |   |   |   |   |   |   |   |   |   |   |   | 2 | 2 |    |    |
| Z              | 2 | 2 | 1 | 1 |   |   |   |   | 1 | 1 | 6 | 6 | 0 | 0 | 0 | 0 |    |    |
| r <sub>2</sub> | · | · | · | · | 4 | 4 | 2 | 2 | · | · | · | · | · | · | · | · | 2. | 0  |
|                | 2 | 1 | 7 | 7 |   |   |   |   | 3 | 3 | 6 | 6 | 4 | 4 | 9 | 9 | 66 | 3. |
|                | 2 | 4 | 5 | 5 |   |   |   |   | 3 | 3 | 3 | 3 | 2 | 2 | 9 | 9 |    | 5  |
|                | 5 | 0 |   |   |   |   |   |   |   |   | 4 | 4 | 6 | 6 | 2 | 5 |    | 0  |
| N              | 2 |   |   |   |   |   |   |   | 1 | 1 | 6 | 6 | 0 | 0 | 0 | 0 |    |    |
| b              | · | 2 | 1 | 1 |   |   |   |   | · | · | · | · | · | · | · | · | 3. | 0  |
|                | 0 | · | · | · | 5 | 5 | 4 | 4 | 6 | 6 | · | · | · | · | · | · | 2  | 3. |
|                | 6 | 1 | 6 | 6 |   |   |   |   |   |   | 7 | 7 | 8 | 8 | 4 | 4 |    | 28 |
| 2              |   | 3 | 4 | 4 |   |   |   |   |   |   | 5 | 5 | 9 | 9 | 7 | 1 |    | 0  |
|                |   | 1 |   |   |   |   |   |   |   |   | 8 | 8 | 3 | 3 | 3 | 0 |    |    |
| M              | 2 |   |   |   |   |   |   |   | 2 | 2 | 7 | 7 | 0 | 0 | 0 | 0 |    |    |
| o              | · | 2 | 1 | 1 |   |   |   |   | · | · | · | · | · | · | · | · | 4. | 0  |
|                | 1 | · | · | · | 6 | 6 | 5 | 5 | 1 | 1 | · | · | · | · | · | · | 32 | 3. |
|                | 2 | 1 | 5 | 5 |   |   |   |   | 6 | 6 | 0 | 0 | 7 | 7 | 7 | 7 |    | 08 |
| 2              | 2 | 3 | 4 | 4 |   |   |   |   |   |   | 9 | 9 | 4 | 4 | 5 | 5 |    | 0  |
|                | 9 | 9 |   |   |   |   |   |   |   |   | 2 | 2 | 8 | 8 | 5 | 7 |    |    |
| R              | 2 |   |   |   |   |   |   |   | 2 | 2 | 7 | 7 |   |   | - | - |    |    |
| u              | · | 2 | 1 | 1 |   |   |   |   | · | · | · | · | 1 | 1 | 1 | 1 | 4. | 0  |
|                | 1 | · | · | · | 8 | 8 | 7 | 7 | 2 | 2 | · | · | · | · | · | · | 4  | 2. |
|                | 9 | 0 | 4 | 4 |   |   |   |   |   |   | 3 | 3 | 0 | 0 | 7 | 7 |    | 84 |
| 2              | 3 | 8 | 2 | 2 |   |   |   |   |   |   | 6 | 6 | 5 | 5 | 3 | 3 |    | 0  |
|                |   | 0 |   |   |   |   |   |   |   |   | 1 | 1 |   |   | 4 | 5 |    |    |
| R              | 2 |   |   |   |   |   |   |   | 2 | 2 | 7 | 7 | 1 | 1 | - | - |    |    |
| h              | · | 2 | 1 | 1 |   |   |   |   | · | · | · | · | · | · | 2 | 2 | 4. | 0  |
|                | 3 | · | · | · | 9 | 9 | 8 | 8 | 2 | 2 | · | · | · | · | · | · | 56 | 2. |
|                | 1 | 0 | 4 | 4 |   |   |   |   | 8 | 8 | 4 | 4 | 1 | 1 | · | · |    | 84 |
| 2              | 6 | 4 | 2 | 2 |   |   |   |   |   |   | 5 | 5 | 3 | 3 | 0 | 0 |    | 0  |
|                |   | 7 |   |   |   |   |   |   |   |   | 9 | 9 | 7 | 7 | 5 | 7 |    |    |
| P              | 2 |   |   |   |   |   |   |   | 2 | 2 | 8 | 8 | 0 | 0 | - | - |    |    |
| d              | · | 2 | 1 | 1 |   |   |   |   | · | · | · | · | · | · | 2 | 2 | 4. | 0  |
|                | 4 | · | · | · | 1 | 1 | 1 | 1 | 2 | 2 | · | · | · | · | · | · | 4  | 2. |
|                | 0 | 0 | 3 | 3 | 0 | 0 | 0 | 0 |   |   | 3 | 3 | 5 | 5 | · | · |    | 78 |
| 2              | 7 | 3 | 9 | 9 |   |   |   |   |   |   | 3 | 3 | 6 | 6 | 4 | 4 |    | 0  |
|                |   | 7 |   |   |   |   |   |   |   |   | 7 | 7 | 2 | 2 | 7 | 7 |    |    |
|                |   |   |   |   |   |   |   |   |   |   |   |   |   |   | 8 | 9 |    |    |
| A              | 2 |   |   |   |   |   |   |   | 1 | 1 | 7 | 7 | 1 | 1 | - | - |    |    |
| g              | · | 2 | 1 | 1 |   |   |   |   | · | · | · | · | · | · | 3 | 3 | 3. | 0  |
|                | 6 | · | · | · | 1 | 1 | 1 | 1 | 9 | 9 | · | · | · | · | · | · | 86 | 2. |
|                | 3 | 3 | 4 | 4 | 1 | 1 | 0 | 0 | 3 | 3 | 5 | 5 | 3 | 3 | · | · |    | 9  |
|                | 3 | 5 | 5 | 5 |   |   |   |   |   |   | 7 | 7 | 0 | 0 | 7 | 7 |    | 0  |
|                |   | 6 |   |   |   |   |   |   |   |   | 6 | 6 | 2 | 2 | 5 | 5 |    |    |







|   |   |   |   |   |   |   |   |   |   |   |   |    |    |    |    |    |     |
|---|---|---|---|---|---|---|---|---|---|---|---|----|----|----|----|----|-----|
| N | . | . | . | . | 0 | . | . | . | . | . | . | 1. | 1. | 54 | 28 | 77 | 9   |
| i | 2 | 0 | 5 | 2 |   | 6 | 9 | 7 | 6 | 5 | 1 | 9  | 7  |    |    |    |     |
|   | 2 | 3 | 3 | 4 |   | 3 | 1 | 4 | 3 | 2 | 5 | 8  | 9  |    |    |    |     |
|   |   | 1 |   |   |   |   |   | 6 | 9 | 5 | 6 | 8  | 2  |    |    |    |     |
| V | 2 | 2 | 1 | 1 |   | 1 | 1 | 6 | 7 | 0 | 1 | -  | -  |    |    |    |     |
| C | . | . | . | . |   | . | . | . | . | . | . | 1. | 3. |    |    |    |     |
| u | 4 | 0 | . | . | 5 | 1 | 3 | 1 | . | . | . | 1. | 3. | 3. | 0. | 2. | 0.2 |
|   | 5 | 2 | 5 | 3 |   | 1 |   | 0 | 6 | 9 | 7 | 7  | 5  | 2  | 1  | 7  |     |
|   | 5 | 1 | 3 | 2 |   | 3 |   |   | 3 |   | 4 | 2  | 2  | 3  | 8  | 5  | 1   |
|   | 5 | 1 | 3 | 2 |   |   |   |   | 6 | 6 | 5 | 5  | 7  | 4  |    |    |     |
| V | 2 | 2 | 1 | 1 |   | 1 | 2 | 6 | 8 | 0 | 0 | -  | -  |    |    |    |     |
| P | . | . | . | . |   | . | . | . | . | . | . | 3. | 3. |    |    |    |     |
| d | 2 | 0 | . | . | 5 | 1 | 3 | 1 | . | . | . | .  | .  | 3. | 0. | 2. | 0.1 |
|   | 8 | 8 | 5 | 3 |   | 0 |   | 0 | 6 | 2 | 7 | 3  | 5  | 5  | 0  | 1  |     |
|   | 1 | 5 | 3 | 9 |   | 3 |   |   | 3 |   | 4 | 3  | 2  | 6  | 0  | 3  |     |
|   | 1 | 5 | 3 | 9 |   |   |   |   | 6 | 7 | 5 | 2  | 3  | 1  |    |    |     |
| V | 2 | 2 | 1 | 1 |   | 1 | 2 | 6 | 9 | 0 | 2 | -  | -  |    |    |    |     |
| P | . | . | . | . |   | . | . | . | . | . | . | 3. | 4. |    |    |    |     |
| t | 3 | 0 | . | . | 5 | 1 | 3 | 9 | . | . | . | .  | .  | 3. | 0. | 2. | 0.1 |
|   | 2 | 7 | 5 | 3 |   | 0 |   |   | 6 | 2 | 7 | 0  | 5  | 1  | 2  | 6  |     |
|   | 2 | 7 | 5 | 3 |   | 3 |   | 9 | 3 | 8 | 4 | 1  | 2  | 2  | 5  | 8  | 7   |
|   | 8 | 3 | 6 |   |   |   |   |   | 6 | 7 | 5 | 8  | 9  | 1  |    |    |     |
| C | 1 | 2 | 1 |   |   | 1 | 1 | 6 | 6 | 0 | 0 | -  | -  |    |    |    |     |
| r | . | . | 1 | 1 |   | . | . | . | . | . | . | 1. | 2. |    |    |    |     |
| T | 8 | 1 | . | . | 6 | 4 | 5 | 2 | . | . | . | .  | .  | 3. | 0. | 2. | 0.2 |
| i | 3 | 2 | 9 | 6 |   | 6 | 5 | 7 | 8 | 6 | 0 | 8  | 3  | 2  | 12 | 99 | 1   |
|   | 5 | 1 |   |   |   |   |   |   | 6 | 4 | 6 | 2  | 6  | 7  | 4  | 4  |     |
|   | 5 | 1 |   |   |   |   |   |   | 6 | 7 | 6 | 9  | 3  | 4  |    |    |     |
| C | 1 | 2 | 1 | 1 |   | 1 | 1 | 6 | 6 | 0 | 0 | -  | -  |    |    |    |     |
| r | . | . | . | . |   | . | . | . | . | . | . | 2. | 2. |    |    |    |     |
| V | 8 | 1 | . | . | 6 | 5 | 5 | 3 | . | . | . | .  | .  | 3. | 0. | 2. | 0.1 |
|   | 7 | 1 | 3 | 5 |   | 6 | 6 | 7 | 7 | 6 | 5 | 9  | 5  | 29 | 03 | 92 | 4   |
|   | 7 | 6 | 9 | 3 |   | 6 | 3 | 6 | 4 | 6 | 2 | 2  | 3  |    |    |    |     |
|   | 7 | 6 | 9 | 3 |   |   |   |   | 6 | 6 | 6 | 5  | 1  | 2  |    |    |     |
| C | 2 | 2 | 1 | 1 |   | 1 | 1 | 6 | 7 | 0 |   | -  | -  |    |    |    |     |
| r | . | . | . | . |   | . | . | . | . | . | . | 1. | 1. |    |    |    |     |
| M | 0 | 0 | . | . | 6 | 7 | 5 | 5 | . | . | . | .  | .  | 3. | 0. | 2. | 0   |
| n | 0 | 8 | 3 | 3 |   | 6 | 5 | 7 | 4 | 6 | 0 | 5  | 8  | 21 | 11 | 78 |     |
|   | 1 | 1 | 9 | 9 |   | 6 | 5 | 6 | 3 | 6 |   | 1  | 8  |    |    |    |     |
|   | 1 | 1 | 9 | 9 |   |   |   |   | 6 | 4 | 6 |    | 1  | 7  |    |    |     |
| C | 2 | 1 | 1 | 1 |   | 1 | 1 | 6 | 7 | 0 | 0 | -  | -  |    |    |    |     |
| r | . | . | . | . |   | . | . | . | . | . | . | 3. | 3. |    |    |    |     |
| F | 4 | 9 | . | . | 6 | 8 | 5 | 6 | . | . | . | .  | .  | 3. | 0. | 2. | 0.0 |
| e | 2 | 8 | 3 | 3 |   | 6 | 8 | 7 | 9 | 6 | 1 | 3  | 1  | 49 | 17 | 71 | 7   |
|   | 4 | 6 | 9 | 2 |   | 6 | 3 | 6 | 0 | 6 | 5 | 3  | 9  |    |    |    |     |
|   | 4 | 6 | 9 | 2 |   |   |   |   | 6 | 2 | 6 | 1  | 4  | 2  |    |    |     |
| C | 2 | 2 | 1 | 1 |   | 1 | 1 | 6 | 7 | 0 | 0 | -  | -  |    |    |    |     |
| r | . | . | . | . |   | . | . | . | . | . | . | 1. | 1. |    |    |    |     |
| C | 2 | 0 | . | . | 6 | 9 | 5 | 7 | . | . | . | .  | .  | 3. | 0. | 2. | 0.1 |
| o | 1 | 3 | 9 | 6 |   | 6 | 8 | 7 | . | 8 | 6 | 6  | 7  | 54 | 22 | 65 | 3   |
|   | 7 | 1 | 9 | 6 |   | 6 | 8 | 6 | 8 | 6 | 6 | 5  | 1  |    |    |    |     |
|   | 7 | 1 | 9 | 6 |   |   |   |   | 6 | 8 | 6 | 2  | 9  | 2  |    |    |     |



|   |   |   |   |   |   |   |   |   |   |   |   |   |   |   |    |    |    |    |    |     |
|---|---|---|---|---|---|---|---|---|---|---|---|---|---|---|----|----|----|----|----|-----|
|   | 7 | 9 |   |   |   |   |   |   |   | 6 | 7 | 6 | 2 | 7 | 3  |    |    |    |    |     |
| C | 2 | 2 | 1 | 1 |   |   |   |   | 1 | 1 | 6 | 7 | 0 | 1 | -  | -  |    |    |    |     |
| r | . | . | . | . |   |   |   |   | . | . | . | . | . | . | 2. | 5. |    |    |    |     |
| A | 4 | 0 | 3 | 4 | 6 | 1 | 5 | 1 | 6 | 9 | 7 | 5 | 6 | 3 | 9  | 0  | 3. | 0. | 2. | 0.0 |
| g | 6 | 7 | 9 | 5 |   | 1 |   | 0 | 6 | 3 | 6 | 7 | 6 | 0 | 9  | 3  | 59 | 27 | 84 | 6   |
|   | 1 | 8 |   |   |   |   |   |   |   |   | 6 | 6 | 6 | 2 | 1  | 9  |    |    |    |     |
| C | 2 | 2 | 1 | 1 |   |   |   |   | 1 | 1 | 6 | 7 | 0 | 0 | -  | -  |    |    |    |     |
| r | . | . | . | . |   |   |   |   | . | . | . | . | . | . | .  | 2. | 3. |    |    |     |
| T | 0 | 0 | 3 | . | 6 | 5 | 5 | 3 | 6 | 5 | 7 | 8 | 6 | 3 | 3  | 4  | 3. | 0. | 3. | 0.3 |
| a | 3 | 8 | 9 | 7 |   |   |   |   | 6 |   | 6 | 8 | 6 | 2 | 1  | 6  | 16 | 16 | 09 | 1   |
|   | 2 | 9 |   |   |   |   |   |   |   |   | 6 | 7 | 6 | 2 | 5  | 9  |    |    |    |     |
| C | 2 | 2 | 1 | 1 |   |   |   |   | 1 | 2 | 6 | 7 | 0 | 0 | -  | -  |    |    |    |     |
| r | . | . | . | . |   |   |   |   | . | . | . | . | . | . | .  | 1. | 2. |    |    |     |
| W | 1 | 0 | 3 | 6 | 6 | 6 | 5 | 4 | 6 | 3 | 7 | . | 6 | 8 | 9  | 7  | 4. | 0. | 3. | 0.2 |
|   | 1 | 9 | 9 | 2 |   |   |   |   | 6 | 6 | 6 | 9 | 6 | 1 | 3  | 8  | 02 | 7  | 01 | 3   |
|   | 9 | 7 |   |   |   |   |   |   |   |   | 6 | 8 | 6 | 5 | 1  | 7  |    |    |    |     |
| C | 2 | 2 | 1 | 1 |   |   |   |   | 1 | 1 | 6 | 7 | 0 | 0 | -  | -  |    |    |    |     |
| r | . | . | . | . |   |   |   |   | . | . | . | . | . | . | .  | 2. | 3. |    |    |     |
| R | 1 | 0 | 3 | 5 | 6 | 7 | 5 | 5 | 6 | 9 | 7 | 8 | 6 | . | 5  | 7  | 3. | 0. | 2. | 0.1 |
| e | 0 | 8 | 9 | 1 |   |   |   |   | 6 |   | 6 | 7 | 6 | 5 | 7  | 0  | 56 | 24 | 9  | 2   |
|   | 7 | 9 |   |   |   |   |   |   |   |   | 6 | 7 | 6 |   | 1  | 6  |    |    |    |     |
| C | 2 | 2 | 1 | 1 |   |   |   |   | 1 | 2 | 6 | 8 | 0 |   | -  | -  |    |    |    |     |
| r | . | . | . | . |   |   |   |   | . | . | . | . | . | . | 1  | 2. | 2. |    |    |     |
| O | 1 | 0 | 3 | 4 | 6 | 8 | 5 | 6 | 6 | 2 | 7 | 7 | 6 | . | 6  | 8  | 3. | 0. | 2. | 0.0 |
| s | 3 | 7 | 9 | 4 |   |   |   |   | 6 |   | 6 | 0 | 6 | 1 | 4  | 5  | 86 | 54 | 83 | 5   |
|   | 7 | 4 |   |   |   |   |   |   |   |   | 6 | 6 | 6 |   | 0  | 4  |    |    |    |     |
| C | 2 | 2 | 1 | 1 |   |   |   |   | 1 | 2 | 6 | 9 | 0 | 1 | -  | -  |    |    |    |     |
| r | . | . | . | . |   |   |   |   | . | . | . | . | . | . | .  | 2. | 3. |    |    |     |
| H | 2 | 0 | 3 | 4 | 6 | 9 | 5 | 7 | 6 | 2 | 7 | 1 | 6 | 5 | 1  | 1  | 3. | 0. | 2. | 0.0 |
| r | 8 | 5 | 9 | 1 |   |   |   |   | 6 |   | 6 | 2 | 6 | 6 | 5  | 7  | 86 | 54 | 8  | 2   |
|   | 9 | 4 |   |   |   |   |   |   |   |   | 6 | 1 | 6 | 5 | 0  | 4  |    |    |    |     |
| C | 2 | 2 | 1 | 1 |   |   |   |   | 1 | 2 | 6 | 9 | 0 | 2 | -  | -  |    |    |    |     |
| r | . | . | . | . |   |   |   |   | . | . | . | . | . | . | .  | 1. | 3. |    |    |     |
| P | 4 | 0 | 3 | 3 | 6 | 1 | 5 | 9 | 6 | 2 | 7 | 0 | 6 | 1 | 3  | 5  | 3. | 0. | 2. | 0.0 |
| t | 1 | 6 | 9 | 6 |   | 0 |   |   | 6 | 8 | 6 | 1 | 6 | 2 | 9  | 7  | 94 | 62 | 75 | 3   |
|   | 3 | 0 |   |   |   |   |   |   |   |   | 6 | 7 | 6 | 8 | 8  | 5  |    |    |    |     |
| C | 2 | 2 | 1 | 1 |   |   |   |   | 1 | 2 | 6 | 9 | 0 | 2 | -  | -  |    |    |    |     |
| r | . | . | . | . |   |   |   |   | . | . | . | . | . | . | .  | 2. | 5. |    |    |     |
| A | 4 | 0 | 3 | 3 | 6 | 1 | 5 | 0 | 6 | 5 | 7 | 2 | 6 | 3 | 8  | 0  | 4. | 0. | 2. | 0.0 |
| u | 6 | 3 | 9 | 6 |   | 1 |   |   | 6 | 4 | 6 | 2 | 6 | 0 | 3  | 3  | 2  | 88 | 75 | 3   |
|   | 6 | 8 |   |   |   |   |   |   |   |   | 6 | 5 | 6 | 9 | 4  | 0  |    |    |    |     |
| M | 1 | 2 | 1 | 1 |   |   |   |   | 1 | 1 | 7 | 6 |   | 0 | -  | -  |    |    |    |     |
| n | . | . | . | . | 7 | 4 | 5 | 2 | . | . | . | . | 0 | . | 1. | 1. | 3. | 0. | 2. | 0.2 |
| T | 9 | 1 | 3 | 6 |   |   |   |   | 5 | 5 | 4 | 8 |   | 0 | 7  | 7  | 09 | 01 | 99 | 1   |

|   |   |   |   |   |   |   |   |   |   |   |   |   |   |   |    |    |  |    |    |    |     |
|---|---|---|---|---|---|---|---|---|---|---|---|---|---|---|----|----|--|----|----|----|-----|
| i | 1 | 2 | 9 |   |   |   |   |   | 5 | 4 | 3 | 2 |   | 7 | 0  | 2  |  |    |    |    |     |
|   | 1 | 3 |   |   |   |   |   |   |   |   | 4 | 7 |   | 9 | 8  | 3  |  |    |    |    |     |
| M | 2 | 2 |   |   |   |   |   |   | 1 | 1 | 7 | 6 |   | 0 | -  | -  |  |    |    |    |     |
| n |   |   | 1 | 1 |   |   |   |   |   |   |   |   |   |   | 2. | 2. |  |    |    |    |     |
| V |   | 1 |   |   | 7 | 5 | 5 | 3 | 5 | 6 | 4 | 7 | 0 | 5 | 4  | 6  |  | 3. | 0. | 2. | 0.1 |
|   |   | 0 |   |   |   |   |   |   | 5 | 3 | 3 | 4 |   | 2 | 6  | 8  |  | 18 | 08 | 92 | 4   |
|   |   | 6 |   |   |   |   |   |   |   |   | 4 | 6 |   | 5 | 1  | 2  |  |    |    |    |     |
| M | 2 | 2 |   |   |   |   |   |   | 1 | 1 | 7 | 7 |   | 0 | -  | -  |  |    |    |    |     |
| n |   |   | 1 | 1 |   |   |   |   |   |   |   |   |   |   | 2. | 2. |  |    |    |    |     |
| F | 2 | 0 |   |   | 7 | 8 | 5 | 6 | 5 | 8 | 4 | 9 | 0 | 1 | 8  | 7  |  | 3. | 0. | 2. | 0.0 |
| e | 9 | 1 |   |   |   |   |   |   | 5 | 3 | 3 | 0 |   | 5 | 0  | 8  |  | 38 | 28 | 71 | 7   |
|   | 1 | 0 |   |   |   |   |   |   |   |   | 4 | 2 |   | 1 | 1  | 2  |  |    |    |    |     |
| M | 2 | 2 |   |   |   |   |   |   | 1 | 1 | 7 | 7 |   | 0 | -  | -  |  |    |    |    |     |
| n |   |   | 1 | 1 |   |   |   |   |   |   |   |   |   |   | 3. | 2. |  |    |    |    |     |
| C | 2 | 0 |   |   | 7 | 9 | 5 | 7 | 5 | 8 | 4 |   | 0 | 6 | 2  | 2  |  | 3. | 0. | 2. | 0.1 |
| o | 5 | 1 |   |   |   |   |   |   | 5 | 8 | 3 | 8 |   | 6 | 4  | 1  |  | 43 | 33 | 65 | 3   |
|   | 1 | 3 |   |   |   |   |   |   |   |   | 4 | 8 |   | 2 | 8  | 7  |  |    |    |    |     |
| M | 2 | 1 |   |   |   |   |   |   | 1 | 1 | 7 | 7 |   | 1 | -  | -  |  |    |    |    |     |
| n |   |   | 1 | 1 |   |   |   |   |   |   |   |   |   |   | 2. | 2. |  |    |    |    |     |
| N | 3 | 9 |   |   | 7 |   | 1 | 5 | 5 | 9 | 4 | 6 | 0 | 1 | 8  | 7  |  | 3. | 0. | 2. | 0.1 |
| i | 3 | 9 |   |   |   |   | 0 | 8 | 5 | 1 | 3 | 3 |   | 5 | 7  | 2  |  | 46 | 36 | 63 | 5   |
|   | 5 | 3 |   |   |   |   |   |   |   |   | 4 | 9 |   | 6 | 4  | 3  |  |    |    |    |     |
| M | 2 | 2 |   |   |   |   |   |   | 1 | 1 | 7 | 7 |   | 1 | -  | -  |  |    |    |    |     |
| n |   |   | 1 | 1 |   |   |   |   |   |   |   |   |   |   | 2. | 3. |  |    |    |    |     |
| C | 4 | 0 |   |   | 7 |   | 1 | 5 | 5 | 9 | 4 | 7 | 0 | 2 | 6  | 2  |  | 3. | 0. | 2. | 0.0 |
| u | 0 | 0 |   |   |   |   | 1 | 0 | 5 |   | 3 | 2 |   | 3 | 3  | 5  |  | 45 | 35 | 71 | 7   |
|   | 7 | 7 |   |   |   |   |   |   |   |   | 4 | 6 |   | 5 | 5  | 6  |  |    |    |    |     |
| M | 2 | 2 |   |   |   |   |   |   | 1 | 2 | 7 | 8 |   | 0 | -  | -  |  |    |    |    |     |
| n |   |   | 1 | 1 |   |   |   |   |   |   |   |   |   |   | 3. | 2. |  |    |    |    |     |
| P | 3 | 0 |   |   | 7 |   | 1 | 5 | 5 | 2 | 4 | 3 | 0 | 5 | 1  | 9  |  | 3. | 0. | 2. | 0   |
| d | 4 | 4 |   |   |   |   | 0 | 0 | 5 |   | 3 | 3 |   | 6 | 8  | 1  |  | 75 | 65 | 78 |     |
|   | 8 | 9 |   |   |   |   |   |   |   |   | 4 | 7 |   | 2 | 5  | 8  |  |    |    |    |     |
| M | 2 | 2 |   |   |   |   |   |   | 1 | 2 | 7 | 9 |   | 2 | -  | -  |  |    |    |    |     |
| n |   |   | 1 | 1 |   |   |   |   |   |   |   |   |   |   | 3. | 3. |  |    |    |    |     |
| P | 3 | 0 |   |   | 7 |   | 1 | 5 | 5 | 2 | 4 | 0 | 0 | 1 | 3  | 9  |  | 3. | 0. | 2. | 0.0 |
| t | 6 | 3 |   |   |   |   | 0 | 9 | 5 | 8 | 3 | 1 |   | 2 | 2  | 9  |  | 83 | 73 | 75 | 3   |
|   | 6 | 3 |   |   |   |   |   |   |   |   | 4 | 7 |   | 8 | 5  | 3  |  |    |    |    |     |
| F | 2 | 2 |   |   |   |   |   |   | 1 | 1 | 7 | 7 | 0 | 0 | -  | -  |  |    |    |    |     |
| e |   |   | 1 | 1 |   |   |   |   |   |   |   |   |   |   | 2. | 2. |  |    |    |    |     |
| C | 2 | 0 |   |   | 8 | 9 | 6 | 7 | 8 | 8 | 9 | 8 | 1 | 6 | 4  | 1  |  | 3. | 0. | 2. | 0.0 |
| o | 0 | 0 |   |   |   |   |   |   | 3 | 8 | 0 | 8 | 5 | 6 | 8  | 2  |  | 71 | 05 | 58 | 6   |
|   | 6 | 6 |   |   |   |   |   |   |   |   | 2 | 8 | 1 | 2 | 3  | 0  |  |    |    |    |     |
| F | 2 | 1 |   |   | 8 |   | 1 | 6 | 1 | 1 | 7 | 7 | 0 | 1 | -  | -  |  | 3. | 0. | 2. | 0.0 |
| e |   |   |   |   |   |   | 0 | 8 |   |   |   |   |   |   | 2. | 2. |  | 74 | 08 | 56 | 8   |



|   |   |   |   |   |   |   |   |   |   |   |   |    |    |    |    |    |    |    |    |     |
|---|---|---|---|---|---|---|---|---|---|---|---|----|----|----|----|----|----|----|----|-----|
| n | . | . | . | . | 2 | 0 | . | . | . | . | . | 6. | 3. | 19 | 11 | 82 | 8  |    |    |     |
| T | 5 | 2 | 2 | 6 |   |   | 6 | 5 | 3 | 8 | 0 | 5  | 1  |    |    |    |    |    |    |     |
| i | 5 | 9 | 2 |   |   |   | 5 | 4 | 9 | 2 | 7 | 0  | 0  |    |    |    |    |    |    |     |
|   | 6 | 1 |   |   |   |   |   |   | 4 | 7 | 9 | 9  | 2  |    |    |    |    |    |    |     |
| Z | 2 | 2 | 1 | 1 |   |   | 1 | 1 | 9 | 6 | 0 | -  | -  |    |    |    |    |    |    |     |
| n | . | . | . | . | 1 |   | . | . | . | . | . | 7. | 1. |    |    |    |    |    |    |     |
| V | 4 | 0 | . | . | 1 | 5 | 1 | 3 | 6 | 6 | 3 | 7  | 0  | 5  | 0  | 9  | 3. | 0. | 2. | 0.3 |
|   | 0 | 4 | 2 | 5 | 2 |   | 0 |   | 5 | 3 | 9 | 4  |    | 2  | 2  | 5  | 28 | 02 | 75 | 1   |
|   | 3 | 4 | 2 | 3 |   |   |   |   |   |   | 4 | 6  |    | 5  | 1  | 9  |    |    |    |     |
| Z | 2 | 2 | 1 | 1 |   |   |   |   | 1 | 1 | 9 | 7  |    |    |    |    |    |    |    |     |
| n | . | . | . | . | 1 |   | . | . | . | . | . |    |    | 6. | 3. |    |    |    |    |     |
| M | 3 | 0 | . | . | 1 | 7 | 1 | 5 | 6 | 5 | 3 | 4  | 0  | 0  | 6  | 4  | 3. | 0. | 2. | 0.1 |
| n | 6 | 8 | 2 | 9 | 2 |   | 0 |   | 5 | 5 | 9 | 3  |    |    | 6  | 0  | 2  | 1  | 61 | 7   |
|   | 9 | 1 | 2 | 9 |   |   |   |   |   |   | 4 | 4  |    |    | 4  | 2  |    |    |    |     |
| Z | 2 | 2 | 1 | 1 |   |   |   |   | 1 | 1 | 9 | 7  |    | 0  | -  | -  |    |    |    |     |
| n | . | . | . | . | 1 |   | . | . | . | . | . |    |    | .  | 6. | 2. |    |    |    |     |
| F | 3 | 0 | . | . | 1 | 8 | 1 | 6 | 6 | 8 | 3 | 9  | 0  | 1  | 2  | 0  | 3. | 0. | 2. | 0.1 |
| e | 0 | 4 | 2 | 3 | 2 |   | 0 |   | 5 | 3 | 9 | 0  |    | 5  | 9  | 4  | 48 | 18 | 54 |     |
|   | 9 | 9 | 2 | 2 |   |   |   |   |   |   | 4 | 2  |    | 1  | 8  | 1  |    |    |    |     |
| Z | 2 | 2 | 1 | 1 |   |   |   |   | 1 | 1 | 9 | 7  |    | 0  | -  | -  |    |    |    |     |
| n | . | . | . | . | 1 |   | . | . | . | . | . |    |    | .  | 6. | 2. |    |    |    |     |
| C | 3 | 0 | . | . | 1 | 9 | 1 | 7 | 6 | 8 | 3 | .  | 0  | 6  | 4  | 7  | 3. | 0. | 2. | 0.0 |
| o | 1 | 3 | 2 | 6 | 2 |   | 0 |   | 5 | 8 | 9 | 8  |    | 6  | 8  | 5  | 53 | 23 | 48 | 4   |
|   | 5 | 1 | 2 | 6 |   |   |   |   |   |   | 4 | 8  |    | 2  | 0  | 0  |    |    |    |     |
| Z | 2 | 2 | 1 | 1 |   |   |   |   | 1 | 1 | 9 | 7  |    | 1  | -  | -  |    |    |    |     |
| n | . | . | . | . | 1 |   | . | . | . | . | . |    |    | .  | 6. | 3. |    |    |    |     |
| N | 2 | 0 | . | . | 1 | 1 | 1 | 8 | 6 | 9 | 3 | 6  | 0  | 1  | 2  | 0  | 3. | 0. | 2. | 0.0 |
| i | 6 | 4 | 2 | 4 | 2 | 0 | 0 |   | 5 | 1 | 9 | 3  |    | 5  | 3  | 4  | 56 | 26 | 46 | 2   |
|   | 5 | 9 | 2 | 4 |   |   |   |   |   |   | 4 | 9  |    | 6  | 9  | 1  |    |    |    |     |
| Z | 2 | 2 | 1 | 1 |   |   |   |   | 1 | 1 | 9 | 7  |    | 1  | -  | -  |    |    |    |     |
| n | . | . | . | . | 1 | 1 | 1 | 1 | . | . | . | .  |    | .  | 7. | 3. |    |    |    |     |
| C | 3 | 0 | . | . | 1 | 1 | 1 | 1 | 6 | 9 | 3 | 7  | 0  | 2  | 0  | 6  | 3. | 0. | 2. | 0.1 |
| u | 2 | 5 | 2 | 2 | 2 | 1 | 0 | 0 | 5 |   | 9 | 2  |    | 3  | 0  | 0  | 55 | 25 | 54 |     |
|   |   | 2 | 2 | 2 |   |   |   |   |   |   | 4 | 6  |    | 5  | 3  | 7  |    |    |    |     |
| Z | 2 | 2 | 1 | 1 |   |   |   |   | 1 | 2 | 9 | 8  |    | 0  | -  | -  |    |    |    |     |
| n | . | . | . | . | 1 | 1 | 1 | 1 | . | . | . | .  |    | .  | 6. | 3. |    |    |    |     |
| P | 3 | 1 | 2 | 3 | 2 | 0 | 0 | 0 | 6 | 2 | 3 | 3  | 0  | 5  | 5  | 5  | 3. | 0. | 2. | 0.1 |
| d | 3 | 1 | 2 | 9 | 2 |   |   |   | 5 |   | 9 | 3  |    | 6  | 1  | 9  | 85 | 55 | 61 | 7   |
|   | 5 | 7 |   |   |   |   |   |   |   |   | 4 | 7  |    | 2  | 9  | 1  |    |    |    |     |
| Z | 2 | 2 | 1 | 1 |   |   |   |   | 1 | 2 | 9 | 9  |    | 2  | -  | -  |    |    |    |     |
| n | . | . | . | . | 1 | 1 | 1 | 9 | . | . | . | .  |    | .  | 4. | 2. |    |    |    |     |
| P | 3 | 1 | 2 | 3 | 2 | 0 | 0 |   | 6 | 2 | 3 | 0  | 0  | 1  | 9  | 1  | 3. | 0. | 2. | 0.1 |
| t | 5 | 0 | 2 | 6 |   |   |   |   | 5 | 8 | 9 | 1  |    | 2  | 5  | 9  | 93 | 63 | 58 | 4   |
|   | 1 | 3 |   |   |   |   |   |   |   |   | 4 | 7  |    | 8  | 8  | 2  |    |    |    |     |

---

|   |   |   |   |   |   |   |   |   |   |   |   |   |   |    |    |    |    |    |     |     |
|---|---|---|---|---|---|---|---|---|---|---|---|---|---|----|----|----|----|----|-----|-----|
| Z | 2 | 2 |   |   |   |   |   |   | 1 | 1 | 6 | 6 | 0 | 0  | -  | -  |    |    |     |     |
| r | . | . | 1 |   |   |   |   |   | . | . | . | . | . | .  | 3. | 2. |    |    |     |     |
| T | 1 | 1 | 7 | 4 | 4 | 2 | 2 | 3 | 5 | 6 | 8 | 4 | 0 | 0  | 5  | 87 | 21 | 35 | 0.1 |     |
| i | 1 | 2 | 5 | 6 |   |   |   | 3 | 4 | 3 | 2 | 2 | 7 | 3  | 3  |    |    |    | 5   |     |
|   | 1 | 4 |   |   |   |   |   |   |   | 4 | 7 | 6 | 9 | 9  | 3  |    |    |    |     |     |
| Z | 2 | 2 | 1 | 1 |   |   |   | 1 | 1 | 6 | 6 | 0 | 0 | -  | -  |    |    |    |     |     |
| r | . | . |   |   |   |   |   | . | . | . | . | . | . | 1. | 0. |    |    |    |     |     |
| V | 0 | 1 | 7 | 5 | 4 | 5 | 2 | 3 | 3 | 6 | 6 | 7 | 4 | 5  | 0  | 8  | 2. | 0. | 3.  | 0.2 |
|   | 4 | 1 | 5 | 3 |   |   |   | 3 | 3 | 3 | 4 | 2 | 2 | 1  | 4  | 96 | 3  | 28 | 2   |     |
|   | 2 | 9 |   |   |   |   |   |   |   | 4 | 6 | 6 | 5 | 7  | 8  |    |    |    |     |     |
| Z | 1 | 2 | 1 | 1 |   |   |   | 1 | 1 | 6 | 7 | 0 |   | -  | -  |    |    |    |     |     |
| r | . | . |   |   |   |   |   | . | . | . | . | . | . | 4. | 3. |    |    |    |     |     |
| M | 9 | 1 | 7 | 3 | 4 | 7 | 2 | 5 | 3 | 5 | 6 | 4 | 4 | 0  | 3  | 5  | 2. | 0. | 3.  | 0.3 |
| n | 6 | 0 | 5 | 9 |   |   |   | 3 | 5 | 3 | 3 | 2 |   | 7  | 1  | 88 | 22 | 14 | 6   |     |
|   | 8 | 7 |   |   |   |   |   |   |   | 4 | 4 | 6 |   | 4  | 2  |    |    |    |     |     |
| Z | 2 | 2 | 1 | 1 |   |   |   | 1 | 1 | 6 | 7 | 0 | 0 | -  | -  |    |    |    |     |     |
| r | . | . |   |   |   |   |   | . | . | . | . | . | . | 3. | 2. |    |    |    |     |     |
| F | 1 | 1 | 7 | 3 | 4 | 8 | 2 | 6 | 3 | 8 | 6 | 9 | 4 | 1  | 6  | 7  | 3. | 0. | 3.  | 0.4 |
| e | 6 | 4 | 5 | 2 |   |   |   | 3 | 3 | 3 | 0 | 2 | 5 | 3  | 3  | 16 | 5  | 07 | 3   |     |
|   | 1 | 0 |   |   |   |   |   |   |   | 4 | 2 | 6 | 1 | 2  | 6  |    |    |    |     |     |
| Z | 2 | 2 | 1 | 1 |   |   |   | 1 | 1 | 6 | 7 | 0 | 0 | -  | -  |    |    |    |     |     |
| r | . | . |   |   |   |   |   | . | . | . | . | . | . | 1. | 1. |    |    |    |     |     |
| C | 1 | 1 | 7 | 2 | 4 | 9 | 2 | 7 | 3 | 8 | 6 | 8 | 4 | 6  | 1  | 0  | 3. | 0. | 3.  | 0.4 |
| o | 8 | 2 | 5 | 6 |   |   |   | 3 | 8 | 3 | 8 | 2 | 6 | 7  | 6  | 21 | 55 | 01 | 9   |     |
|   | 2 | 3 |   |   |   |   |   |   |   | 4 | 8 | 6 | 2 | 5  | 8  |    |    |    |     |     |
| Z | 2 | 2 | 1 | 1 |   |   |   | 1 | 1 | 6 | 7 | 0 | 1 | -  | -  |    |    |    |     |     |
| r | . | . |   |   |   |   |   | . | . | . | . | . | . | 3. | 2. |    |    |    |     |     |
| N | 3 | 0 | 7 | 2 | 4 | 1 | 2 | 8 | 3 | 9 | 6 | 6 | 4 | 1  | 5  | 1  | 3. | 0. | 2.  | 0.5 |
| i | 2 | 9 | 5 | 4 |   |   |   | 3 | 1 | 3 | 3 | 2 | 5 | 2  | 6  | 24 | 58 | 99 | 1   |     |
|   | 5 | 6 |   |   |   |   |   |   |   | 4 | 9 | 6 | 6 | 7  | 4  |    |    |    |     |     |
| Z | 2 | 2 | 1 | 1 |   |   |   | 1 | 1 | 6 | 7 | 0 | 1 | -  | -  |    |    |    |     |     |
| r | . | . |   |   |   |   |   | . | . | . | . | . | . | 4. | 2. |    |    |    |     |     |
| C | 4 | 3 | 7 | 3 | 4 | 1 | 2 | 1 | 3 | 9 | 6 | 7 | 4 | 2  | 1  | 1  | 3. | 0. | 3.  | 0.4 |
| u | 9 | 3 | 5 | 2 |   |   |   | 3 |   | 3 | 2 | 2 | 3 | 7  | 2  | 23 | 57 | 07 | 3   |     |
|   | 8 | 2 |   |   |   |   |   |   |   | 4 | 6 | 6 | 5 | 5  | 6  |    |    |    |     |     |
| Z | 2 | 3 | 1 | 1 |   |   |   | 1 | 1 | 6 | 9 | 0 |   | -  | -  |    |    |    |     |     |
| r | . | . |   |   |   |   |   | . | . | . | . | . | . | 2. | 7. |    |    |    |     |     |
| Z | 7 | 1 | 7 | 2 | 4 | 1 | 2 | 1 | 3 | 6 | 6 | 3 | 4 | 0  | 2  | 3  | 2. | 0. | 2.  | 0.5 |
| n | 2 | 4 | 5 | 2 |   |   |   | 3 | 5 | 3 | 9 | 2 |   | 1  | 7  | 98 | 32 | 97 | 3   |     |
|   | 2 | 0 |   |   |   |   |   |   |   | 4 | 4 | 6 |   | 0  | 8  |    |    |    |     |     |
| Z | 2 | 2 | 1 | 1 |   |   |   | 1 | 1 | 6 | 6 | 0 | 0 | -  | -  |    |    |    |     |     |
| r | . | . |   |   |   |   |   | . | . | . | . | . | . | 2. | 2. |    |    |    |     |     |
| N | 1 | 1 | 7 | 6 | 4 | 5 | 2 | 5 | 3 | 6 | 6 | 7 | 4 | 8  | 9  | 5  | 2. | 0. | 3.  | 0.1 |
| b | 5 | 3 | 5 | 4 |   |   |   | 3 |   | 3 | 5 | 2 | 9 | 1  | 4  | 93 | 27 | 39 | 1   |     |

---



|    |   |   |   |   |   |   |   |   |   |   |   |   |   |   |    |    |    |    |    |     |
|----|---|---|---|---|---|---|---|---|---|---|---|---|---|---|----|----|----|----|----|-----|
|    | 1 | 4 |   |   |   |   |   |   |   | 4 | 8 | 6 | 3 | 1 | 4  |    |    |    |    |     |
| Z  | 2 | 2 | 1 | 1 |   |   |   |   | 1 | 2 | 6 | 7 | 0 | 1 | -  | -  |    |    |    |     |
| r  | . | . | . | . |   |   |   |   | . | . | . | . | . | . | 4. | 3. |    |    |    |     |
| R  | 2 | 1 | 7 | 4 | 4 | 9 | 2 | 8 | 3 | 2 | 6 | 4 | 4 | 1 | 4  | 8  | 3. | 0. | 3. | 0.3 |
| h  | 8 | 8 | 5 | 2 |   |   |   |   | 3 | 8 | 3 | 5 | 2 | 3 | 3  | 2  | 61 | 95 | 17 | 3   |
|    | 4 | 1 |   |   |   |   |   |   |   |   | 4 | 9 | 6 | 7 | 6  | 0  |    |    |    |     |
| Z  | 2 | 2 | 1 | 1 |   |   |   |   | 1 | 2 | 6 | 8 | 0 | 0 | -  | -  |    |    |    |     |
| r  | . | . | . | . |   |   |   |   | . | . | . | . | . | . | 3. | 4. |    |    |    |     |
| P  | 3 | 1 | 7 | 3 | 4 | 1 | 2 | 1 | 3 | 2 | 6 | 3 | 4 | 5 | 9  | 3  | 3. | 0. | 3. | 0.3 |
| d  | 9 | 6 | 5 | 9 |   | 0 |   | 0 | 3 |   | 3 | 3 | 2 | 6 | 2  | 4  | 53 | 87 | 14 | 6   |
|    | 3 | 2 |   |   |   |   |   |   |   |   | 4 | 7 | 6 | 2 | 2  | 9  |    |    |    |     |
| Z  | 2 | 3 | 1 | 1 |   |   |   |   | 1 | 1 | 6 | 7 | 0 | 1 | -  | -  |    |    |    |     |
| r  | . | . | . | . |   |   |   |   | . | . | . | . | . | . | 2. | 3. |    |    |    |     |
| A  | 6 | 1 | 7 | 4 | 4 | 1 | 2 | 1 | 3 | 9 | 6 | 5 | 4 | 3 | 5  | 3  | 3. | 0. | 3. | 0.3 |
| g  | 7 | 9 | 5 | 5 |   | 1 |   | 0 | 3 | 3 | 3 | 7 | 2 | 0 | 0  | 8  | 26 | 6  | 2  |     |
|    | 7 | 4 |   |   |   |   |   |   |   |   | 4 | 6 | 6 | 2 | 5  | 4  |    |    |    |     |
| Z  | 2 | 2 | 1 | 1 |   |   |   |   | 1 | 1 | 6 | 7 | 0 | 0 | -  | -  |    |    |    |     |
| r  | . | . | . | . |   |   |   |   | . | . | . | . | . | . | 2. | 2. |    |    |    |     |
| T  | 1 | 1 | 7 | . | 4 | 5 | 2 | 3 | 3 | 5 | 6 | 8 | 4 | 3 | 1  | 2  | 2. | 0. | 3. | 0.0 |
| a  | 9 | 2 | 5 | 7 |   |   |   |   | 3 |   | 3 | 8 | 2 | 2 | 5  | 2  | 83 | 17 | 45 | 5   |
|    | 2 |   |   |   |   |   |   |   |   |   | 4 | 7 | 6 | 2 | 6  | 7  |    |    |    |     |
| Z  | 2 | 2 | 1 | 1 |   |   |   |   | 1 | 2 | 6 | 9 | 0 | 1 | -  | -  |    |    |    |     |
| rl | . | . | . | . |   |   |   |   | . | . | . | . | . | . | 4. | 3. |    |    |    |     |
| r  | 3 | 1 | 7 | 4 | 4 | 9 | 2 | 7 | 3 | 2 | 6 | 1 | 4 | 5 | 2  | 7  | 3. | 0. | 3. | 0.3 |
|    | 5 | 5 | 5 | 1 |   |   |   |   | 3 |   | 3 | 2 | 2 | 6 | 8  | 7  | 53 | 87 | 16 | 4   |
|    | 9 | 5 |   |   |   |   |   |   |   |   | 4 | 1 | 6 | 5 | 4  | 2  |    |    |    |     |
| Z  | 2 | 2 | 1 | 1 |   |   |   |   | 1 | 2 | 6 | 9 | 0 | 2 | -  | -  |    |    |    |     |
| r  | . | . | . | . |   |   |   |   | . | . | . | . | . | . | 4. | 3. |    |    |    |     |
| P  | 4 | 1 | 7 | 3 | 4 | 1 | 2 | 9 | 3 | 2 | 6 | 0 | 4 | 1 | 2  | 9  | 3. | 0. | 3. | 0.3 |
| t  | 4 | 4 | 5 | 6 |   | 0 |   |   | 3 | 8 | 3 | 1 | 2 | 2 | 6  | 5  | 61 | 95 | 11 | 9   |
|    | 4 | 3 |   |   |   |   |   |   |   |   | 4 | 7 | 6 | 8 | 9  | 9  |    |    |    |     |
| Z  | 2 | 2 | 1 | 1 |   |   |   |   | 1 | 2 | 6 | 9 | 0 | 2 | -  | -  |    |    |    |     |
| r  | . | . | . | . |   |   |   |   | . | . | . | . | . | . | 3. | 5. |    |    |    |     |
| A  | 5 | 1 | 7 | 3 | 4 | 1 | 2 | 1 | 3 | 5 | 6 | 2 | 4 | 3 | 4  | 2  | 3. | 1. | 3. | 0.3 |
| u  | 7 | 3 | 5 | 6 |   | 1 |   | 0 | 3 | 4 | 3 | 2 | 2 | 0 | 5  | 5  | 87 | 21 | 11 | 9   |
|    | 7 | 6 |   |   |   |   |   |   |   |   | 4 | 5 | 6 | 9 | 5  | 6  |    |    |    |     |
| N  | 2 | 2 | 1 | 1 |   |   |   |   | 1 | 1 | 6 | 6 | 0 | 0 | -  | -  |    |    |    |     |
| b  | . | . | . | . |   |   |   |   | . | . | . | . | . | . | 0. | 0. |    |    |    |     |
| T  | 0 | 1 | 6 | . | 5 | 4 | 5 | 2 | 6 | 5 | 7 | 8 | 8 | 0 | 9  | 9  | 3. | 0. | 3. | 0.0 |
| i  | 3 | 2 | 4 | 6 |   |   |   |   |   | 4 | 5 | 2 | 9 | 7 | 0  | 1  | 14 | 06 | 24 | 4   |
|    | 1 | 0 |   |   |   |   |   |   |   |   | 8 | 7 | 3 | 9 | 5  | 9  |    |    |    |     |
| N  | 1 | 2 | 1 | 1 |   |   |   |   | 1 | 1 | 6 | 6 | 0 | 0 | -  | -  |    |    |    |     |
| b  | . | . | . | . | 5 | 5 | 5 | 3 | . | . | . | . | . | . | 2. | 2. | 3. | 0. | 3. | 0.1 |
| V  | 9 | 1 | 6 | 5 |   |   |   |   | 6 | 6 | 7 | 7 | 8 | 5 | 9  | 6  | 23 | 03 | 17 | 1   |

|   |   |   |   |   |   |   |   |   |   |   |   |   |   |   |    |    |    |    |    |     |
|---|---|---|---|---|---|---|---|---|---|---|---|---|---|---|----|----|----|----|----|-----|
|   | 4 | 2 | 4 | 3 |   |   |   |   |   | 3 | 5 | 4 | 9 | 2 | 8  | 2  |    |    |    |     |
|   | 1 | 1 |   |   |   |   |   |   |   |   | 8 | 6 | 3 | 5 | 2  | 5  |    |    |    |     |
| N | 2 | 2 | 1 | 1 |   |   |   |   | 1 | 1 | 6 | 7 | 0 |   | -  | -  |    |    |    |     |
| b | . | . | . | . |   |   |   |   | . | . | . | . | . |   | 2. | 2. |    |    |    |     |
| M | 0 | 1 | 6 | 3 | 5 | 7 | 5 | 5 | 6 | 5 | 7 | 4 | 8 | 0 | 4  | 1  | 3. | 0. | 3. | 0.2 |
| n | 5 | 2 | 4 | 9 |   |   |   |   |   | 5 | 5 | 3 | 9 |   | 0  | 5  | 15 | 05 | 03 | 5   |
|   | 4 | 4 |   |   |   |   |   |   |   |   | 8 | 4 | 3 |   | 1  | 8  |    |    |    |     |
| N | 2 | 2 | 1 | 1 |   |   |   |   | 1 | 1 | 6 | 7 | 0 | 0 | -  | -  |    |    |    |     |
| b | . | . | . | . |   |   |   |   | . | . | . | . | . |   | 2. | 2. |    |    |    |     |
| F | 1 | 1 | 6 | 3 | 5 | 8 | 5 | 6 | 6 | 8 | 7 | 9 | 8 | 1 | 7  | 3  | 3. | 0. | 2. | 0.3 |
| e |   | 0 | 4 | 2 |   |   |   |   |   | 3 | 5 | 0 | 9 | 5 | 0  | 0  | 43 | 23 | 96 | 2   |
|   | 8 |   |   |   |   |   |   |   |   |   | 8 | 2 | 3 | 1 | 7  | 0  |    |    |    |     |
| N | 2 | 2 | 1 | 1 |   |   |   |   | 1 | 1 | 6 | 7 | 0 | 0 | -  | -  |    |    |    |     |
| b | . | . | . | . |   |   |   |   | . | . | . | . | . |   | 2. | 2. |    |    |    |     |
| C | 1 | 0 | 6 | 2 | 5 | 9 | 5 | 7 | 6 | 8 | 7 | . | 8 | 6 | 7  | 1  | 3. | 0. | 2. | 0.3 |
| o | 5 | 8 | 4 | 6 |   |   |   |   |   | 8 | 5 | 8 | 9 | 6 | 3  | 8  | 48 | 28 | 9  | 8   |
|   | 1 | 2 |   |   |   |   |   |   |   |   | 8 | 8 | 3 | 2 | 5  | 8  |    |    |    |     |
| N | 2 | 2 | 1 | 1 |   |   |   |   | 1 | 1 | 6 | 7 | 0 | 1 | -  | -  |    |    |    |     |
| b | . | . | . | . |   |   |   |   | . | . | . | . | . |   | 4. | 2. |    |    |    |     |
| N | 2 | 0 | 6 | 2 | 5 | 1 | 5 | 8 | 6 | 9 | 7 | 6 | 8 | 1 | 3  | 8  | 3. | 0. | 2. | 0.4 |
| i | 8 | 6 | 4 | 4 |   | 0 |   |   |   | 1 | 5 | 3 | 9 | 5 | 4  | 2  | 51 | 31 | 88 |     |
|   | 7 | 0 |   |   |   |   |   |   |   |   | 8 | 9 | 3 | 6 | 0  | 5  |    |    |    |     |
| N | 2 | 2 | 1 | 1 |   |   |   |   | 1 | 1 | 6 | 7 | 0 | 1 | -  | -  |    |    |    |     |
| b | . | . | . | . |   |   |   |   | . | . | . | . | . |   | 2. | 2. |    |    |    |     |
| C | 4 | 2 | 6 | 3 | 5 | 1 | 5 | 1 | 6 | 9 | 7 | 7 | 8 | 2 | 6  | 7  | 3. | 0. | 2. | 0.3 |
| u | 3 | 3 | 4 | 2 |   | 1 | 0 |   |   |   | 5 | 2 | 9 | 3 | 6  | 8  | 5  | 3  | 96 | 2   |
|   | 2 | 3 |   |   |   |   |   |   |   |   | 8 | 6 | 3 | 5 | 3  | 2  |    |    |    |     |
| N | 2 | 2 | 1 | 1 |   |   |   |   | 1 | 1 | 6 | 9 | 0 |   | -  | -  |    |    |    |     |
| b | . | . | . | . |   |   |   |   | . | . | . | . | . |   | 2. | 6. |    |    |    |     |
| Z | 6 | 3 | 6 | 2 | 5 | 1 | 5 | 1 | 6 | 6 | 7 | 3 | 8 | 0 | 1  | 7  | 3. | 0. | 2. | 0.4 |
| n | 0 | 4 | 4 | 2 |   | 2 | 0 |   |   | 5 | 5 | 9 | 9 |   | 9  | 3  | 25 | 05 | 86 | 2   |
|   | 6 | 9 |   |   |   |   |   |   |   |   | 8 | 4 | 3 |   | 4  | 7  |    |    |    |     |
| N | 2 | 2 | 1 | 1 |   |   |   |   | 1 | 2 | 6 | 7 | 0 | 1 | -  | -  |    |    |    |     |
| b | . | . | . | . |   |   |   |   | . | . | . | . | . |   | 3. | 3. |    |    |    |     |
| R | 2 | 1 | 6 | 4 | 5 | 9 | 5 | 8 | 6 | 2 | 7 | 4 | 8 | 1 | 5  | 1  | 3. | 0. | 3. | 0.2 |
| h | 2 | 2 | 4 | 2 |   |   |   |   |   | 8 | 5 | 5 | 9 | 3 | 2  | 7  | 88 | 68 | 06 | 2   |
|   | 9 | 2 |   |   |   |   |   |   |   |   | 8 | 9 | 3 | 7 | 5  | 7  |    |    |    |     |
| N | 2 | 2 | 1 | 1 |   |   |   |   | 1 | 2 | 6 | 8 | 0 | 0 | -  | -  |    |    |    |     |
| b | . | . | . | . |   |   |   |   | . | . | . | . | . |   | 4. | 4. |    |    |    |     |
| P | 3 | 1 | 6 | 3 | 5 | 1 | 5 | 1 | 6 | 2 | 7 | 3 | 8 | 5 | 2  | 5  | 3. | 0. | 3. | 0.2 |
| d | 5 | 1 | 4 | 9 |   | 0 | 0 |   |   |   | 5 | 3 | 9 | 6 | 2  | 3  | 8  | 6  | 03 | 5   |
|   | 4 | 8 |   |   |   |   |   |   |   |   | 8 | 7 | 3 | 2 | 2  | 9  |    |    |    |     |
| N | 2 | 2 | 1 | 1 | 5 | 1 | 5 | 9 | 1 | 2 | 6 | 9 | 0 | 2 | -  | -  | 3. | 0. | 3  | 0.2 |
| b | . | . | . | . |   | 0 |   |   | . | . | . | . | . |   | 3. | 4. | 88 | 68 | 3  | 8   |

---

|   |   |   |   |   |   |   |   |   |   |   |   |   |   |   |    |    |   |  |  |  |  |    |    |    |     |  |  |
|---|---|---|---|---|---|---|---|---|---|---|---|---|---|---|----|----|---|--|--|--|--|----|----|----|-----|--|--|
| P | 3 | 0 | 6 | 3 |   |   |   |   | 6 | 2 | 7 | 0 | 8 | 1 | 7  | 1  |   |  |  |  |  |    |    |    |     |  |  |
| t | 9 | 9 | 4 | 6 |   |   |   |   |   | 8 | 5 | 1 | 9 | 2 | 0  | 0  |   |  |  |  |  |    |    |    |     |  |  |
|   | 2 | 6 |   |   |   |   |   |   |   |   | 8 | 7 | 3 | 8 | 6  | 5  |   |  |  |  |  |    |    |    |     |  |  |
| M | 1 | 2 |   |   |   |   |   |   | 2 | 1 | 7 | 6 | 0 | 0 | -  | -  |   |  |  |  |  |    |    |    |     |  |  |
| o | . | . | 1 | 1 |   |   |   |   | . | . | . | . | . | . | 3. | 3. |   |  |  |  |  |    |    |    |     |  |  |
| T | 9 | 1 | 5 | . | 6 | 4 | 5 | 2 | 1 | 5 | 0 | 8 | 7 | 0 | 4  | 1  |   |  |  |  |  | 3. | 0. | 3. | 0.0 |  |  |
| i | 6 | 2 | 4 | 6 |   |   |   |   | 6 | 4 | 9 | 2 | 4 | 7 | 9  | 0  |   |  |  |  |  | 7  | 62 | 14 | 6   |  |  |
|   | 2 | 1 |   |   |   |   |   |   |   |   | 2 | 7 | 8 | 9 | 1  | 9  |   |  |  |  |  |    |    |    |     |  |  |
| M | 1 | 2 |   |   |   |   |   |   | 2 | 1 | 7 | 6 | 0 | 0 | -  | -  |   |  |  |  |  |    |    |    |     |  |  |
| o | . | . | 1 | 1 |   |   |   |   | . | . | . | . | . | . | 3. | 3. |   |  |  |  |  |    |    |    |     |  |  |
| V | 9 | 1 | 5 | 5 | 6 | 5 | 5 | 3 | 1 | 6 | 0 | 7 | 7 | 5 | 7  | 1  |   |  |  |  |  | 3. | 0. | 3. | 0.0 |  |  |
|   | 2 | 0 | 4 | 3 |   |   |   |   | 6 | 3 | 9 | 4 | 4 | 4 | 2  | 1  | 5 |  |  |  |  | 79 | 53 | 07 | 1   |  |  |
|   | 6 | 6 |   |   |   |   |   |   |   |   | 2 | 6 | 8 | 5 | 3  | 6  |   |  |  |  |  |    |    |    |     |  |  |
| M | 2 | 2 |   |   |   |   |   |   | 2 | 1 | 7 | 7 | 0 |   | -  | -  |   |  |  |  |  |    |    |    |     |  |  |
| o | . | . | 1 | 1 |   |   |   |   | . | . | . | . | . | . | 2. | 2. |   |  |  |  |  |    |    |    |     |  |  |
| M | 0 | 1 | 5 | 3 | 6 | 7 | 5 | 5 | 1 | 5 | 0 | 4 | 7 | 0 | 4  | 2  |   |  |  |  |  | 3. | 0. | 2. | 0.1 |  |  |
| n | 8 | 0 | 4 | 9 |   |   |   |   | 6 | 5 | 9 | 3 | 4 |   | 4  | 7  |   |  |  |  |  | 71 | 61 | 93 | 5   |  |  |
|   | 2 | 2 |   |   |   |   |   |   |   |   | 2 | 4 | 8 |   | 2  | 9  |   |  |  |  |  |    |    |    |     |  |  |
| M | 2 | 2 |   |   |   |   |   |   | 2 | 1 | 7 | 7 | 0 | 0 | -  | -  |   |  |  |  |  |    |    |    |     |  |  |
| o | . | . | 1 | 1 |   |   |   |   | . | . | . | . | . | . | 3. | 2. |   |  |  |  |  |    |    |    |     |  |  |
| F | 0 | 0 | 5 | 3 | 6 | 8 | 5 | 6 | 1 | 8 | 0 | 9 | 7 | 1 | 4  | 7  |   |  |  |  |  | 3. | 0. | 2. | 0.2 |  |  |
| e | 7 | 8 | 4 | 2 |   |   |   |   | 6 | 3 | 9 | 0 | 4 | 5 | 2  | 5  |   |  |  |  |  | 99 | 33 | 86 | 2   |  |  |
|   | 0 |   |   |   |   |   |   |   |   |   | 2 | 2 | 8 | 1 | 8  | 1  |   |  |  |  |  |    |    |    |     |  |  |
| M | 2 | 2 |   |   |   |   |   |   | 2 | 1 | 7 |   |   |   |    |    |   |  |  |  |  |    |    |    |     |  |  |
| o | . | . | 1 | 1 |   |   |   |   | . | . | . | . | . | . | 2. | 2. |   |  |  |  |  |    |    |    |     |  |  |
| C | 1 | 0 | 5 | 2 | 6 | 9 | 5 | 7 | 1 | 8 | 0 |   | 7 | 6 | 6  | 5  |   |  |  |  |  | 4. | 0. | 2. | 0.2 |  |  |
| o | 4 | 5 | 4 | 6 |   |   |   |   | 6 | 8 | 9 | 8 | 4 | 6 | 0  | 6  |   |  |  |  |  | 04 | 28 | 8  | 8   |  |  |
|   | 6 | 8 |   |   |   |   |   |   |   |   | 2 | 8 | 8 | 2 | 8  | 2  |   |  |  |  |  |    |    |    |     |  |  |
| M | 2 | 2 |   |   |   |   |   |   | 2 | 1 | 7 | 7 | 0 | 1 | -  | -  |   |  |  |  |  |    |    |    |     |  |  |
| o | . | . | 1 | 1 |   |   |   |   | . | . | . | . | . | . | 3. | 2. |   |  |  |  |  |    |    |    |     |  |  |
| N | 2 | 0 | 5 | 2 | 6 | 1 | 5 | 8 | 1 | 9 | 0 | 6 | 7 | 1 | 1  | 3  |   |  |  |  |  | 4. | 0. | 2. | 0.3 |  |  |
| i | 3 | 4 | 4 | 4 |   |   |   |   | 6 | 1 | 9 | 3 | 4 | 5 | 7  | 7  |   |  |  |  |  | 07 | 25 | 78 |     |  |  |
|   | 5 | 0 |   |   |   |   |   |   |   |   | 2 | 9 | 8 | 6 | 3  | 4  |   |  |  |  |  |    |    |    |     |  |  |
| M | 2 | 2 |   |   |   |   |   |   | 2 | 1 | 7 | 7 | 0 | 1 | -  | -  |   |  |  |  |  |    |    |    |     |  |  |
| o | . | . | 1 | 1 |   |   |   |   | . | . | . | . | . | . | 2. | 3. |   |  |  |  |  |    |    |    |     |  |  |
| C | 4 | 0 | 5 | 3 | 6 | 1 | 5 | 1 | 1 | 9 | 0 | 7 | 7 | 2 | 5  | 0  |   |  |  |  |  | 4. | 0. | 2. | 0.2 |  |  |
| u | 9 | 4 | 4 | 2 |   |   |   |   | 6 |   | 9 | 2 | 4 | 3 | 3  | 6  |   |  |  |  |  | 06 | 26 | 86 | 2   |  |  |
|   | 5 | 3 |   |   |   |   |   |   |   |   | 2 | 6 | 8 | 5 | 5  | 1  |   |  |  |  |  |    |    |    |     |  |  |
| M | 2 | 2 |   |   |   |   |   |   | 2 | 1 | 7 | 9 | 0 |   | -  | -  |   |  |  |  |  |    |    |    |     |  |  |
| o | . | . | 1 | 1 |   |   |   |   | . | . | . | . | . | . | 1. | 6. |   |  |  |  |  |    |    |    |     |  |  |
| Z | 4 | 2 | 5 | 2 | 6 | 1 | 5 | 1 | 1 | 6 | 0 | 3 | 7 | 0 | 9  | 6  |   |  |  |  |  | 3. | 0. | 2. | 0.3 |  |  |
| n | 8 | 4 | 4 | 2 |   |   |   |   | 6 | 5 | 9 | 9 | 4 |   | 7  | 7  |   |  |  |  |  | 81 | 51 | 76 | 2   |  |  |
|   | 7 | 7 |   |   |   |   |   |   |   |   | 2 | 4 | 8 |   | 7  | 6  |   |  |  |  |  |    |    |    |     |  |  |
| M | 2 | 2 |   |   | 6 | 4 | 5 | 2 | 2 | 1 | 7 | 6 | 0 | 0 | -  | -  |   |  |  |  |  | 3. | 0. | 3. | 0.2 |  |  |

---

|   |   |   |   |   |   |   |   |   |  |  |  |  |  |  |  |    |    |    |    |    |   |    |    |
|---|---|---|---|---|---|---|---|---|--|--|--|--|--|--|--|----|----|----|----|----|---|----|----|
| o | . | . | . | . |   |   |   |   |  |  |  |  |  |  |  | 3. | 3. | 49 | 83 | 29 | 1 |    |    |
| Z | 0 | 1 | 5 | 7 |   |   |   |   |  |  |  |  |  |  |  | 1  | 3  | 0  | 6  | 7  | 4 | 0  | 0  |
| r | 8 | 3 | 4 | 5 |   |   |   |   |  |  |  |  |  |  |  | 6  | 3  | 9  | 3  | 4  | 2 | 4  | 7  |
|   | 6 | 1 |   |   |   |   |   |   |  |  |  |  |  |  |  |    |    | 2  | 4  | 8  | 6 | 8  | 9  |
| M | 2 | 2 | 1 | 1 |   |   |   |   |  |  |  |  |  |  |  | 2  | 1  | 7  | 6  | 0  | 0 | -  | -  |
| o | . | . | . | . |   |   |   |   |  |  |  |  |  |  |  | .  | .  | .  | .  | .  | . | 3. | 3. |
| N | 0 | 1 | . | . | 6 | 5 | 5 | 5 |  |  |  |  |  |  |  | 1  | 6  | 0  | 7  | 7  | 8 | 2  | 2  |
| b | 3 | 1 | 5 | 6 |   |   |   |   |  |  |  |  |  |  |  | 6  |    | 9  | 5  | 4  | 9 | 9  | 9  |
|   | 2 | 5 | 4 | 4 |   |   |   |   |  |  |  |  |  |  |  |    |    | 2  | 8  | 8  | 3 | 0  | 4  |
| M | 2 | 2 | 1 | 1 |   |   |   |   |  |  |  |  |  |  |  | 2  | 2  | 7  | 7  | 0  | 1 | -  | -  |
| o | . | . | . | . |   |   |   |   |  |  |  |  |  |  |  | .  | .  | .  | .  | .  | . | 3. | 3. |
| R | 1 | 1 | . | . | 6 | 8 | 5 | 7 |  |  |  |  |  |  |  | 1  | 2  | 0  | 3  | 7  | . | 5  | 2  |
| u | 6 | 0 | 4 | 2 |   |   |   |   |  |  |  |  |  |  |  | 6  |    | 9  | 6  | 4  | 9 | 9  | 9  |
|   | 2 | 5 | 4 | 2 |   |   |   |   |  |  |  |  |  |  |  |    |    | 2  | 1  | 8  | 5 | 9  | 6  |
| M | 2 | 2 | 1 | 1 |   |   |   |   |  |  |  |  |  |  |  | 2  | 2  | 7  | 7  | 0  | 1 | -  | -  |
| o | . | . | . | . |   |   |   |   |  |  |  |  |  |  |  | .  | .  | .  | .  | .  | . | 3. | 3. |
| R | 2 | 0 | . | . | 6 | 9 | 5 | 8 |  |  |  |  |  |  |  | 1  | 2  | 0  | 4  | 7  | 1 | 5  | 8  |
| h | 2 | 9 | 5 | 4 |   |   |   |   |  |  |  |  |  |  |  | 6  | 8  | 9  | 5  | 4  | 3 | 1  | 9  |
|   | 1 | 3 | 4 | 2 |   |   |   |   |  |  |  |  |  |  |  |    |    | 2  | 9  | 8  | 7 | 8  | 5  |
| M | 2 | 2 | 1 | 1 |   |   |   |   |  |  |  |  |  |  |  | 2  | 2  | 7  | 8  | 0  | 0 | -  | -  |
| o | . | . | . | . |   |   |   |   |  |  |  |  |  |  |  | .  | .  | .  | .  | .  | . | 4. | 3. |
| P | 4 | 1 | . | . | 6 | 1 | 5 | 1 |  |  |  |  |  |  |  | 1  | 2  | 0  | 3  | 7  | 5 | 8  | 8  |
| d | 3 | 0 | 4 | 9 |   |   |   |   |  |  |  |  |  |  |  | 6  |    | 9  | 3  | 4  | 6 | 8  | 6  |
|   | 9 | 1 | 4 | 9 |   |   |   |   |  |  |  |  |  |  |  |    |    | 2  | 7  | 8  | 2 | 4  | 1  |
| M | 2 | 2 | 1 | 1 |   |   |   |   |  |  |  |  |  |  |  | 2  | 1  | 7  | 7  | 0  | 1 | -  | -  |
| o | . | . | . | . |   |   |   |   |  |  |  |  |  |  |  | .  | .  | .  | .  | .  | . | 5. | 3. |
| A | 6 | 3 | . | . | 6 | 1 | 5 | 1 |  |  |  |  |  |  |  | 1  | 9  | 0  | 5  | 7  | 3 | 5  | 7  |
| g | 7 | 9 | 5 | 4 |   |   |   |   |  |  |  |  |  |  |  | 6  | 3  | 9  | 7  | 4  | 0 | 0  | 5  |
|   |   | 3 | 4 | 5 |   |   |   |   |  |  |  |  |  |  |  |    |    | 2  | 6  | 8  | 2 | 2  | 4  |
| M | 2 | 2 | 1 | 1 |   |   |   |   |  |  |  |  |  |  |  | 2  | 1  | 7  | 7  | 0  | 0 | -  | -  |
| o | . | . | . | . |   |   |   |   |  |  |  |  |  |  |  | .  | .  | .  | .  | .  | . | 4. | 4. |
| T | 0 | 0 | . | . | 6 | 5 | 5 | 3 |  |  |  |  |  |  |  | 1  | 5  | 0  | 8  | 7  | 3 | 4  | 8  |
| a | 8 | 9 | 5 | 7 |   |   |   |   |  |  |  |  |  |  |  | 6  |    | 9  | 8  | 4  | 2 | 0  | 5  |
|   | 9 | 7 | 4 |   |   |   |   |   |  |  |  |  |  |  |  |    |    | 2  | 7  | 8  | 2 | 8  | 6  |
| M | 2 | 2 | 1 | 1 |   |   |   |   |  |  |  |  |  |  |  | 2  | 2  | 7  | 7  | 0  | 0 | -  | -  |
| o | . | . | . | . |   |   |   |   |  |  |  |  |  |  |  | .  | .  | .  | .  | .  | . | 3. | 3. |
| W | 2 | 1 | . | . | 6 | 6 | 5 | 4 |  |  |  |  |  |  |  | 1  | 3  | 0  | 9  | 7  | 8 | 0  | 2  |
|   | 2 | 2 | 5 | 6 |   |   |   |   |  |  |  |  |  |  |  | 6  | 6  | 9  | 9  | 4  | 1 | 5  | 5  |
|   | 3 | 8 | 4 | 2 |   |   |   |   |  |  |  |  |  |  |  |    |    | 2  | 8  | 8  | 5 | 1  | 6  |
| M | 2 | 2 | 1 | 1 |   |   |   |   |  |  |  |  |  |  |  | 2  | 1  | 7  | 7  | 0  | 0 | -  | -  |
| o | . | . | . | . |   |   |   |   |  |  |  |  |  |  |  | .  | .  | .  | .  | .  | . | 3. | 2. |
| R | 2 | 1 | . | . | 6 | 7 | 5 | 5 |  |  |  |  |  |  |  | 1  | 9  | 0  | 8  | 7  | . | 0  | 9  |
| e | 0 | 0 | 4 | 1 |   |   |   |   |  |  |  |  |  |  |  | 6  |    | 9  | 7  | 4  | 5 | 0  | 7  |
|   | 1 | 7 |   |   |   |   |   |   |  |  |  |  |  |  |  |    |    | 2  | 7  | 8  | 7 | 0  | 0  |



|      |        |        |        |        |   |        |        |        |        |        |        |        |        |        |        |         |          |          |          |          |
|------|--------|--------|--------|--------|---|--------|--------|--------|--------|--------|--------|--------|--------|--------|--------|---------|----------|----------|----------|----------|
| RuNi | 5<br>2 | 4<br>2 | 1<br>1 | 1<br>1 | 8 | 1<br>0 | 7<br>8 | 8<br>2 | 2<br>9 | 1<br>3 | 7<br>6 | 7<br>3 | 1<br>0 | 2<br>1 | 9<br>4 | 4<br>1  | 4.<br>11 | 0.<br>29 | 2.<br>66 | 0.1<br>8 |
| RuCu | 2<br>4 | 2<br>0 | 1<br>4 | 1<br>3 | 8 | 1<br>1 | 7<br>0 | 1<br>2 | 2<br>9 | 1<br>3 | 7<br>7 | 7<br>0 | 1<br>0 | 2<br>2 | 9<br>3 | 4<br>4  | 4.<br>1  | 0.<br>3  | 2.<br>74 | 0.1      |
| RuZn | 2<br>4 | 2<br>1 | 1<br>4 | 1<br>2 | 8 | 1<br>2 | 7<br>0 | 1<br>2 | 2<br>6 | 1<br>3 | 7<br>3 | 9<br>3 | 1<br>0 | 2<br>5 | 9<br>9 | 4<br>5  | 3.<br>85 | 0.<br>55 | 2.<br>64 | 0.2      |
| RuZr | 2<br>6 | 2<br>7 | 1<br>2 | 1<br>5 | 8 | 4      | 7<br>2 | 2<br>2 | 2<br>3 | 1<br>3 | 7<br>6 | 6<br>3 | 1<br>0 | 2<br>3 | 6<br>6 | 3<br>4  | 3.<br>53 | 0.<br>87 | 3.<br>17 | 0.3<br>3 |
| RuNb | 2<br>1 | 2<br>1 | 1<br>4 | 1<br>6 | 8 | 5      | 7<br>5 | 2<br>2 | 2<br>6 | 1<br>3 | 7<br>7 | 6<br>5 | 1<br>0 | 2<br>8 | 6<br>9 | 1<br>7  | 3.<br>8  | 0.<br>6  | 3.<br>06 | 0.2<br>2 |
| RuRh | 3<br>3 | 0<br>5 | 4<br>2 | 4<br>2 | 8 | 9      | 7<br>8 | 2<br>8 | 2<br>6 | 2<br>5 | 3<br>5 | 4<br>9 | 0<br>5 | 2<br>1 | 6<br>3 | 9<br>2  | 4.<br>48 | 0.<br>08 | 2.<br>84 | 0        |
| RuPd | 2<br>4 | 2<br>0 | 1<br>4 | 1<br>3 | 8 | 1<br>0 | 7<br>0 | 1<br>2 | 2<br>2 | 2<br>3 | 7<br>3 | 8<br>3 | 1<br>0 | 2<br>6 | 8<br>4 | 4.<br>4 | 0        | 2.<br>81 | 0.0<br>3 |          |
| RuAg | 2<br>5 | 2<br>2 | 1<br>4 | 1<br>4 | 8 | 1<br>1 | 7<br>0 | 1<br>2 | 2<br>9 | 1<br>3 | 7<br>5 | 7<br>0 | 1<br>0 | 2<br>3 | 9<br>5 | 4<br>4  | 4.<br>13 | 0.<br>27 | 2.<br>87 | 0.0<br>3 |
| RuT  | 2<br>2 | 2<br>1 | 1<br>4 | 1<br>7 | 8 | 5      | 7<br>3 | 2<br>2 | 2<br>5 | 1<br>3 | 7<br>8 | 7<br>0 | 1<br>0 | 2<br>3 | 9<br>0 | 4<br>2  | 3.<br>7  | 0.<br>7  | 3.<br>12 | 0.2<br>8 |

|    |   |   |   |   |   |   |   |   |   |   |   |   |   |    |    |    |    |    |    |     |
|----|---|---|---|---|---|---|---|---|---|---|---|---|---|----|----|----|----|----|----|-----|
| a  | 3 | 1 | 2 |   |   |   |   |   |   | 6 | 8 | 5 | 2 | 3  | 7  |    |    |    |    |     |
|    |   | 8 |   |   |   |   |   |   |   | 1 | 7 |   | 2 | 3  | 1  |    |    |    |    |     |
| R  | 2 | 2 | 1 | 1 |   |   |   |   | 2 | 2 | 7 | 9 | 1 | -  | -  |    |    |    |    |     |
| u  | . | . | . | . |   |   |   |   | . | . | . | . | . | 2. | 3. |    |    |    |    |     |
| Ir | 4 | 0 | 4 | 4 | 8 | 9 | 7 | 7 | 2 | 2 | 3 | 1 | . | 5  | 6  | 4  | 4. | 0  | 2. | 0.0 |
|    | 3 | 3 | 2 | 1 |   |   |   |   |   |   | 6 | 2 | 5 | 6  | 0  | 3  | 4  | 0  | 83 | 1   |
|    | 2 | 8 |   |   |   |   |   |   |   |   | 1 | 1 | 5 | 5  | 3  | 7  |    |    |    |     |
| R  | 2 | 2 | 1 | 1 |   |   |   |   | 2 | 2 | 7 | 9 | 1 | 2  | -  | -  |    |    |    |     |
| u  | . | . | . | . |   |   |   |   | . | . | . | . | . | .  | 1. | 3. |    |    |    |     |
| P  | 5 | 0 | 4 | 3 | 8 | 1 | 7 | 9 | 2 | 2 | 3 | 0 | . | 1  | 4  | 4  | 4. | 0. | 2. | 0.0 |
| t  | 0 | 4 | 2 | 6 |   |   |   |   | 8 | 6 | 1 | 5 | 0 | 2  | 7  | 5  | 48 | 08 | 78 | 6   |
|    | 2 | 1 |   |   |   |   |   |   |   |   | 1 | 7 | 5 | 8  | 2  | 9  |    |    |    |     |
| R  | 2 | 2 | 1 | 1 |   |   |   |   | 2 | 2 | 7 | 9 | 1 | 2  | -  | -  |    |    |    |     |
| u  | . | . | . | . |   |   |   |   | . | . | . | . | . | .  | 2. | 4. |    |    |    |     |
| A  | 5 | 0 | 4 | 3 | 8 | 1 | 7 | 1 | 2 | 5 | 3 | 2 | . | 3  | 9  | 7  | 4. | 0. | 2. | 0.0 |
| u  | 3 | 5 | 2 | 6 |   |   |   |   | 4 | 6 | 2 | 5 | 0 | 0  | 8  | 7  | 74 | 34 | 78 | 6   |
|    | 5 | 5 |   |   |   |   |   |   |   |   | 1 | 5 | 5 | 9  | 9  | 2  |    |    |    |     |
| R  | 2 | 2 | 1 |   |   |   |   |   | 2 | 1 | 7 | 6 | 1 | 0  | -  | -  |    |    |    |     |
| h  | . | . | . | 1 |   |   |   |   | . | . | . | . | . | .  | 3. | 3. |    |    |    |     |
| T  | 1 | 1 | 4 | . | 9 | 4 | 8 | 2 | 2 | 5 | 4 | 8 | 1 | 0  | 5  | 4  | 3. | 0. | 3. | 0.1 |
| i  | 1 | 2 | 2 | 6 |   |   |   |   | 8 | 4 | 5 | 2 | 3 | 7  | 7  | 6  | 82 | 74 | 02 | 8   |
|    | 5 | 7 |   |   |   |   |   |   |   |   | 9 | 7 | 7 | 9  | 7  | 5  |    |    |    |     |
| R  | 2 | 2 | 1 | 1 |   |   |   |   | 2 | 1 | 7 | 6 | 1 | 0  | -  | -  |    |    |    |     |
| h  | . | . | . | . |   |   |   |   | . | . | . | . | . | .  | 3. | 3. |    |    |    |     |
| V  | 1 | 1 | 4 | 5 | 9 | 5 | 8 | 3 | 2 | 6 | 4 | 7 | 1 | 5  | 5  | 3  | 3. | 0. | 2. | 0.1 |
|    | 2 | 0 | 2 | 3 |   |   |   |   | 8 | 3 | 5 | 4 | 3 | 2  | 4  | 1  | 91 | 65 | 95 | 1   |
|    | 3 | 1 |   |   |   |   |   |   |   |   | 9 | 6 | 7 | 5  | 9  | 9  |    |    |    |     |
| R  | 2 | 2 | 1 | 1 |   |   |   |   | 2 | 1 | 7 | 7 | 1 |    | -  | -  |    |    |    |     |
| h  | . | . | . | . |   |   |   |   | . | . | . | . | . | .  | 3. | 3. |    |    |    |     |
| M  | 3 | 0 | 4 | 3 | 9 | 7 | 8 | 5 | 2 | 5 | 4 | 4 | 1 | 0  | 0  | 7  | 3. | 0. | 2. | 0.0 |
| n  | 1 | 6 | 2 | 9 |   |   |   |   | 8 | 5 | 5 | 3 | 3 |    | 0  | 3  | 83 | 73 | 81 | 3   |
|    | 2 | 1 |   |   |   |   |   |   |   |   | 9 | 4 | 7 |    | 5  | 9  |    |    |    |     |
| R  | 2 | 2 | 1 | 1 |   |   |   |   | 2 | 1 | 7 | 7 | 1 | 0  | -  | -  |    |    |    |     |
| h  | . | . | . | . |   |   |   |   | . | . | . | . | . | .  | 2. | 2. |    |    |    |     |
| F  | 2 | 0 | 4 | 3 | 9 | 8 | 8 | 6 | 2 | 8 | 4 | 9 | 1 | 1  | 4  | 8  | 4. | 0. | 2. | 0.1 |
| e  | 5 | 3 | 2 | 2 |   |   |   |   | 8 | 3 | 5 | 0 | 3 | 5  | 4  | 4  | 11 | 45 | 74 |     |
|    | 6 | 0 |   |   |   |   |   |   |   |   | 9 | 2 | 7 | 1  | 9  | 0  |    |    |    |     |
| R  | 2 | 2 | 1 | 1 |   |   |   |   | 2 | 1 | 7 | 7 | 1 | 0  | -  | -  |    |    |    |     |
| h  | . | . | . | . |   |   |   |   | . | . | . | . | . | .  | 3. | 2. |    |    |    |     |
| C  | 2 | 0 | 4 | 2 | 9 | 9 | 8 | 7 | 2 | 8 | 4 | 8 | 1 | 6  | 2  | 3  | 4. | 0. | 2. | 0.1 |
| o  | 9 | 1 | 2 | 6 |   |   |   |   | 8 | 8 | 5 | 8 | 3 | 6  | 2  | 3  | 16 | 4  | 68 | 6   |
|    | 5 | 4 |   |   |   |   |   |   |   |   | 9 | 8 | 7 | 2  | 8  | 0  |    |    |    |     |
| R  | 2 | 1 | 1 | 1 | 9 | 1 | 8 | 8 | 2 | 1 | 7 | 7 | 1 | 1  | -  | -  | 4. | 0. | 2. | 0.1 |
| h  | . | . | . | . | 0 |   |   |   | . | . | . | . | . | .  | 0. | 0. | 19 | 37 | 66 | 8   |





|   |   |   |   |   |   |   |   |   |   |   |   |   |    |    |    |   |    |    |    |     |
|---|---|---|---|---|---|---|---|---|---|---|---|---|----|----|----|---|----|----|----|-----|
| g | . | . | . | . | 1 | 0 | . | . | . | . | . | . | 4. | 2. | 56 | 3 | 98 | 8  |    |     |
| V | 6 | 2 | 4 | 5 |   |   | 9 | 6 | 5 | 7 | 3 | 5 | 1  | 7  |    |   |    |    |    |     |
|   | 0 | 6 | 5 | 3 |   |   | 3 | 3 | 7 | 4 | 0 | 2 | 7  | 3  |    |   |    |    |    |     |
|   | 4 | 5 |   |   |   |   |   |   | 6 | 6 | 2 | 5 | 7  | 8  |    |   |    |    |    |     |
| A | 2 | 2 | 1 | 1 |   |   | 1 | 1 | 7 | 7 | 1 |   | -  | -  |    |   |    |    |    |     |
| g | . | . | . | . | 1 |   | . | . | . | . | . | . | 5. | 3. |    |   |    |    |    |     |
| M | 3 | 0 | . | . | 1 | 7 | 1 | 5 | 9 | 5 | 5 | 4 | 3  | 0  | 6  | 3 | 3. | 0. | 2. | 0.0 |
| n | 9 | 2 | 4 | 3 | 1 |   | 0 |   | 3 | 5 | 7 | 3 | 0  |    | 9  | 0 | 48 | 38 | 84 | 6   |
|   | 5 | 7 | 5 | 9 |   |   |   |   |   | 6 | 4 | 2 |    | 7  | 2  |   |    |    |    |     |
| A | 2 | 2 | 1 | 1 |   |   |   |   | 1 | 1 | 7 | 7 | 1  | 0  | -  | - |    |    |    |     |
| g | . | . | . | . | 1 |   | . | . | . | . | . | . | .  | 5. | 2. |   |    |    |    |     |
| F | 3 | 0 | . | . | 1 | 8 | 1 | 6 | 9 | 8 | 5 | 9 | 3  | 1  | 0  | 1 | 3. | 0. | 2. | 0.1 |
| e | 9 | 2 | 4 | 3 | 1 |   | 0 |   | 3 | 3 | 7 | 0 | 0  | 5  | 8  | 8 | 76 | 1  | 77 | 3   |
|   | 7 | 0 | 5 | 2 |   |   |   |   |   | 6 | 2 | 2 | 1  | 4  | 7  |   |    |    |    |     |
| A | 2 | 2 | 1 | 1 |   |   |   |   | 1 | 1 | 7 | 7 | 1  | 0  | -  | - |    |    |    |     |
| g | . | . | . | . | 1 |   | . | . | . | . | . | . | .  | 4. | 1. |   |    |    |    |     |
| C | 3 | 0 | . | . | 1 | 9 | 1 | 7 | 9 | 8 | 5 | . | 3  | 6  | 8  | 7 | 3. | 0. | 2. | 0.1 |
| o | 8 | 1 | 4 | 2 | 1 |   | 0 |   | 3 | 8 | 7 | 8 | 0  | 6  | 9  | 4 | 81 | 05 | 71 | 9   |
|   | 9 | 3 | 5 | 6 |   |   |   |   |   | 6 | 8 | 2 | 2  | 7  | 1  |   |    |    |    |     |
| A | 2 | 2 | 1 | 1 |   |   |   |   | 1 | 1 | 7 | 7 | 1  | 1  | -  | - |    |    |    |     |
| g | . | . | . | . | 1 |   | . | . | . | . | . | . | .  | 4. | 2. |   |    |    |    |     |
| N | 3 | 0 | . | . | 1 | 1 | 1 | 8 | 9 | 9 | 5 | 6 | 3  | 1  | 5  | 0 | 3. | 0. | 2. | 0.2 |
| i | 6 | 4 | 5 | 4 | 1 | 0 | 0 |   | 3 | 1 | 7 | 3 | 0  | 5  | 6  | 6 | 84 | 02 | 69 | 1   |
|   |   | 3 |   |   |   |   |   |   |   | 6 | 9 | 2 | 6  | 4  | 0  |   |    |    |    |     |
| A | 2 | 2 | 1 | 1 |   |   |   |   | 1 | 1 | 7 | 7 | 1  | 1  | -  | - |    |    |    |     |
| g | . | . | . | . | 1 |   | . | . | . | . | . | . | .  | 4. | 2. |   |    |    |    |     |
| C | 3 | 0 | . | . | 1 | 1 | 1 | 1 | 9 | 9 | 5 | 7 | 3  | 2  | 5  | 9 | 3. | 0. | 2. | 0.1 |
| u | 8 | 8 | 4 | 3 | 1 | 1 | 0 | 0 | 3 |   | 7 | 2 | 0  | 3  | 1  | 4 | 83 | 03 | 77 | 3   |
|   | 6 | 5 | 5 | 2 |   |   |   |   |   | 6 | 6 | 2 | 5  | 6  | 9  |   |    |    |    |     |
| A | 2 | 2 | 1 | 1 |   |   |   |   | 1 | 1 | 7 | 9 | 1  |    | -  | - |    |    |    |     |
| g | . | . | . | . | 1 |   | . | . | . | . | . | . | .  | 5. | 7. |   |    |    |    |     |
| Z | 3 | 1 | . | . | 1 | 1 | 1 | 1 | 9 | 6 | 5 | 3 | 3  | 0  | 0  | 1 | 3. | 0. | 2. | 0.2 |
| n | 6 | 1 | 4 | 2 | 1 | 2 | 0 | 0 | 3 | 5 | 7 | 9 | 0  |    | 4  | 7 | 58 | 28 | 67 | 3   |
|   | 7 | 6 | 5 | 2 |   |   |   |   |   | 6 | 4 | 2 |    | 3  | 4  |   |    |    |    |     |
| A | 2 | 3 | 1 | 1 |   |   |   |   | 1 | 1 | 7 | 6 | 1  | 0  | -  | - |    |    |    |     |
| g | . | . | . | . | 1 |   | . | . | . | . | . | . | .  | 3. | 3. |   |    |    |    |     |
| N | 6 | 1 | 4 | 6 | 1 | 5 | 1 | 5 | 9 | 6 | 5 | 7 | 3  | 8  | 2  | 7 | 3. | 0. | 3. | 0.1 |
| b | 3 | 4 | 5 | 4 | 1 |   |   |   | 3 |   | 7 | 5 | 0  | 9  | 5  | 2 | 53 | 33 | 09 | 9   |
|   | 8 | 6 |   |   |   |   |   |   |   | 6 | 8 | 2 | 3  | 4  | 7  |   |    |    |    |     |
| A | 2 | 2 | 1 | 1 |   |   |   |   | 1 | 2 | 7 | 7 | 1  | 1  | -  | - |    |    |    |     |
| g | . | . | . | . | 1 |   | . | . | . | . | . | . | .  | 4. | 2. |   |    |    |    |     |
| R | 4 | 0 | . | . | 1 | 9 | 1 | 8 | 9 | 2 | 5 | 4 | 3  | 1  | 8  | 7 | 4. | 0. | 2. | 0.0 |
| h | 3 | 3 | 5 | 2 | 1 |   |   |   | 3 | 8 | 7 | 5 | 0  | 3  | 2  | 0 | 21 | 35 | 87 | 3   |
|   | 2 | 9 |   |   |   |   |   |   |   | 6 | 9 | 2 | 7  | 0  | 3  |   |    |    |    |     |

|   |   |   |   |   |   |   |   |   |   |   |   |   |   |   |    |    |    |    |    |     |
|---|---|---|---|---|---|---|---|---|---|---|---|---|---|---|----|----|----|----|----|-----|
| A | 2 | 2 |   |   |   |   |   |   | 1 | 2 | 7 | 8 | 1 | 0 | -  | -  |    |    |    |     |
| g | . | . | 1 | 1 |   |   |   |   | . | . | . | . | . | . | 4. | 3. |    |    |    |     |
| P | 4 | 1 | 4 | 3 | 1 | 1 | 1 | 1 | 9 | 2 | 5 | 3 | 3 | 5 | 7  | 4  | 4. | 0. | 2. | 0.0 |
| d | 7 | 0 | 5 | 9 |   |   |   |   | 3 |   | 7 | 3 | 0 | 6 | 4  | 6  | 13 | 27 | 84 | 6   |
|   | 4 | 2 |   |   |   |   |   |   |   | 6 | 7 | 2 | 2 | 7 | 9  |    |    |    |    |     |
| A | 2 | 2 | 1 | 1 |   |   |   |   | 1 | 2 | 7 | 9 | 1 | 2 | -  | -  |    |    |    |     |
| g | . | . |   |   |   |   |   |   | . | . | . | . | . | . | 5. | 4. |    |    |    |     |
| P | 4 | 0 | . | . | 1 | 1 | 1 | 9 | 9 | 2 | 5 | 0 | 3 | 1 | 2  | 2  | 4. | 0. | 2. | 0.0 |
| t | 8 | 6 | 4 | 3 | 1 | 0 | 0 |   | 3 | 8 | 7 | 1 | 0 | 2 | 5  | 1  | 21 | 35 | 81 | 9   |
|   | 6 | 8 | 5 | 6 |   |   |   |   |   | 6 | 7 | 2 | 8 | 2 | 6  |    |    |    |    |     |
| T | 2 | 2 |   |   |   |   |   |   | 1 | 1 | 7 | 6 | 0 | 0 | -  | -  |    |    |    |     |
| a | . | . | 1 | 1 |   |   |   |   | . | . | . | . | . | . | 3. | 2. |    |    |    |     |
| T | 0 | 1 | . | . | 5 | 4 | 3 | 2 | 5 | 5 | 8 | 8 | 3 | 0 | 4  | 5  | 3. | 0. | 3. | 0.1 |
| i | 7 | 0 | 7 | 6 |   |   |   |   |   | 4 | 8 | 2 | 2 | 7 | 5  | 6  | 04 | 04 | 3  |     |
|   | 8 | 5 |   |   |   |   |   |   |   | 7 | 7 | 2 | 9 | 9 | 8  |    |    |    |    |     |
| T | 2 | 2 |   |   |   |   |   |   | 1 | 1 | 7 | 6 | 0 | 0 | -  | -  |    |    |    |     |
| a | . | . | 1 | 1 |   |   |   |   | . | . | . | . | . | . | 3. | 2. |    |    |    |     |
| V | 0 | 1 | . | . | 5 | 5 | 3 | 3 | 5 | 6 | 8 | 7 | 3 | 5 | 3  | 4  | 3. | 0. | 3. | 0.1 |
|   | 0 | 0 | 7 | 5 |   |   |   |   |   | 3 | 8 | 4 | 2 | 2 | 1  | 8  | 13 | 13 | 23 | 7   |
|   | 3 | 1 |   | 3 |   |   |   |   |   | 7 | 6 | 2 | 5 | 6 | 4  |    |    |    |    |     |
| T | 2 | 2 |   |   |   |   |   |   | 1 | 1 | 7 | 7 | 0 |   | -  | -  |    |    |    |     |
| a | . | . | 1 | 1 |   |   |   |   | . | . | . | . | . | . | 2. | 2. |    |    |    |     |
| M | 1 | 1 | . | . | 5 | 7 | 3 | 5 | 5 | 5 | 8 | 4 | 3 | 0 | 9  | 4  | 3. | 0. | 3. | 0.3 |
| n | 8 | 0 | 7 | 9 |   |   |   |   |   | 5 | 8 | 3 | 2 |   | 0  | 7  | 05 | 05 | 09 | 1   |
|   |   | 6 |   |   |   |   |   |   |   | 7 | 4 | 2 |   | 9 | 7  |    |    |    |    |     |
| T | 2 | 2 |   |   |   |   |   |   | 1 | 1 | 7 | 7 | 0 | 0 | -  | -  |    |    |    |     |
| a | . | . | 1 | 1 |   |   |   |   | . | . | . | . | . | . | 3. | 2. |    |    |    |     |
| F | 1 | 0 | . | . | 5 | 8 | 3 | 6 | 5 | 8 | 8 | 9 | 3 | 1 | 2  | 2  | 3. | 0. | 3. | 0.3 |
| e | 6 | 8 | 7 | 3 |   |   |   |   |   | 3 | 8 | 0 | 2 | 5 | 0  | 8  | 33 | 33 | 02 | 8   |
|   | 9 | 6 |   | 2 |   |   |   |   |   | 7 | 2 | 2 | 1 | 9 | 5  |    |    |    |    |     |
| T | 2 | 2 |   |   |   |   |   |   | 1 | 1 | 7 | 7 | 0 | 0 | -  | -  |    |    |    |     |
| a | . | . | 1 | 1 |   |   |   |   | . | . | . | . | . | . | 4. | 2. |    |    |    |     |
| C | 2 | 0 | . | . | 5 | 9 | 3 | 7 | 5 | 8 | 8 | . | 3 | 6 | 3  | 6  | 3. | 0. | 2. | 0.4 |
| o | 0 | 6 | 7 | 2 |   |   |   |   |   | 8 | 8 | 8 | 2 | 6 | 3  | 6  | 38 | 38 | 96 | 4   |
|   | 9 | 4 |   | 6 |   |   |   |   |   | 7 | 8 | 2 | 2 | 3 | 3  |    |    |    |    |     |
| T | 2 | 2 |   |   |   |   |   |   | 1 | 1 | 7 | 7 | 0 | 1 | -  | -  |    |    |    |     |
| a | . | . | 1 | 1 |   |   |   |   | . | . | . | . | . | . | 3. | 2. |    |    |    |     |
| N | 3 | 0 | . | . | 5 | 1 | 3 | 8 | 5 | 9 | 8 | 6 | 3 | 1 | 2  | 9  | 3. | 0. | 2. | 0.4 |
| i | 0 | 4 | 7 | 4 |   |   |   |   |   | 1 | 8 | 3 | 2 | 5 | 6  | 9  | 41 | 41 | 94 | 6   |
|   | 1 | 5 |   |   |   |   |   |   |   | 7 | 9 | 2 | 6 | 2 | 5  |    |    |    |    |     |
| T | 2 | 2 |   |   |   |   |   |   | 1 | 1 | 7 | 7 | 0 | 1 | -  | -  |    |    |    |     |
| a | . | . | 1 | 1 |   |   |   |   | . | . | . | . | . | . | 3. | 2. |    |    |    |     |
| C | 4 | 2 | 7 | 3 | 5 | 1 | 3 | 1 | . | . | . | . | . | . | 3. | 2. | 3. | 0. | 3. | 0.3 |
| u | 1 | 2 |   | 2 |   |   |   |   | 5 | 9 | 8 | 7 | 3 | 2 | 9  | 7  | 4  | 4  | 02 | 8   |
|   |   |   |   |   |   |   |   |   |   | 8 | 2 | 2 | 3 | 5 | 6  |    |    |    |    |     |

|   |   |   |   |   |   |   |   |   |   |   |   |   |   |   |   |    |    |    |    |     |     |
|---|---|---|---|---|---|---|---|---|---|---|---|---|---|---|---|----|----|----|----|-----|-----|
|   | 1 | 1 |   |   |   |   |   |   |   | 7 | 6 | 2 | 5 | 5 | 0 |    |    |    |    |     |     |
| T | 2 | 2 |   |   |   |   |   |   |   | 1 | 1 | 7 | 9 | 0 |   | -  | -  |    |    |     |     |
| a | . | . | 1 |   |   |   |   |   |   | . | . | . | . | . |   | 3. | 6. |    |    |     |     |
| Z | 5 | 2 | . | . | 5 | 1 | 3 | 1 | 5 | 6 | 8 | 3 | 3 | 0 | 2 | 7  | 3. | 0. | 2. | 0.4 |     |
| n | 5 | 7 | 7 | 2 |   | 2 |   | 0 |   | 5 | 8 | 9 | 2 |   | 0 | 3  | 15 | 15 | 92 | 8   |     |
|   | 7 | 2 |   | 2 |   |   |   |   |   | 7 | 4 | 2 |   |   | 5 | 8  |    |    |    |     |     |
| T | 2 | 2 |   |   |   |   |   |   |   | 1 | 1 | 7 | 6 | 0 | 0 | -  | -  |    |    |     |     |
| a | . | . | 1 |   |   |   |   |   |   | . | . | . | . | . |   | 3. | 2. |    |    |     |     |
| N | 1 | 1 | . | . | 5 | 5 | 3 | 5 | 5 | 6 | 8 | 7 | 3 | 8 | 1 | 8  | 3. | 0. | 3. | 0.0 |     |
| b | 1 | 1 | 7 | 6 |   |   |   |   |   |   | 8 | 5 | 2 | 9 | 0 | 9  | 1  | 1  | 34 | 6   |     |
|   | 1 | 4 |   | 4 |   |   |   |   |   |   | 7 | 8 | 2 | 3 | 7 | 7  |    |    |    |     |     |
| T | 2 | 2 |   |   |   |   |   |   |   | 1 | 2 | 7 | 7 | 0 | 1 | -  | -  |    |    |     |     |
| a | . | . | 1 |   |   |   |   |   |   | . | . | . | . | . |   | 4. | 3. |    |    |     |     |
| R | 2 | 1 | . | . | 5 | 9 | 3 | 8 | 5 | 2 | 8 | 4 | 3 | 1 | 4 | 6  | 3. | 0. | 3. | 0.2 |     |
| h | 7 | 0 | 7 | 4 |   |   |   |   |   | 8 | 8 | 5 | 2 | 3 | 8 | 9  | 78 | 78 | 12 | 8   |     |
|   | 6 | 5 |   | 2 |   |   |   |   |   |   | 7 | 9 | 2 | 7 | 0 | 1  |    |    |    |     |     |
| T | 2 | 2 |   |   |   |   |   |   |   | 1 | 2 | 7 | 8 | 0 | 0 | -  | -  |    |    |     |     |
| a | . | . | 1 |   |   |   |   |   |   | . | . | . | . | . |   | 3. | 3. |    |    |     |     |
| P | 3 | 1 | . | . | 5 | 1 | 3 | 1 | 5 | 2 | 8 | 3 | 3 | 5 | 2 | 5  | 3. | 0. | 3. | 0.3 |     |
| d | 6 | 0 | 7 | 3 |   | 0 |   | 0 |   |   | 8 | 3 | 2 | 6 | 5 | 9  | 7  | 7  | 09 | 1   |     |
|   | 8 | 7 |   | 9 |   |   |   |   |   |   | 7 | 7 | 2 | 2 | 6 | 5  |    |    |    |     |     |
| T | 2 | 3 |   |   |   |   |   |   |   | 1 | 1 | 7 | 7 | 0 | 1 | -  | -  |    |    |     |     |
| a | . | . | 1 |   |   |   |   |   |   | . | . | . | . | . |   | 3. | 3. |    |    |     |     |
| A | 6 | 1 | . | . | 5 | 1 | 3 | 1 | 5 | 9 | 8 | 5 | 3 | 3 | 3 | 4  | 3. | 0. | 3. | 0.2 |     |
| g | 2 | 5 | 7 | 4 |   |   |   | 0 |   | 3 | 8 | 7 | 2 | 0 | 3 | 9  | 43 | 43 | 15 | 5   |     |
|   | 2 | 2 |   | 5 |   |   |   |   |   |   | 7 | 6 | 2 | 2 | 0 | 3  |    |    |    |     |     |
| T | 2 | 2 |   |   |   |   |   |   |   | 1 | 2 | 7 | 9 | 0 | 2 | -  | -  |    |    |     |     |
| a | . | . | 1 |   |   |   |   |   |   | . | . | . | . | . |   | 3. | 3. |    |    |     |     |
| P | 4 | 0 | . | . | 5 | 1 | 3 | 9 | 5 | 2 | 8 | 0 | 3 | 1 | 6 | 8  | 3. | 0. | 3. | 0.3 |     |
| t | 0 | 8 | 7 | 3 |   | 0 |   |   |   | 8 | 8 | 1 | 2 | 2 | 8 | 8  | 78 | 78 | 06 | 4   |     |
|   | 2 | 7 |   | 6 |   |   |   |   |   |   | 7 | 7 | 2 | 8 | 3 | 9  |    |    |    |     |     |
| W | 2 | 2 |   |   |   |   |   |   |   | 2 | 1 | 7 | 6 | 0 | 0 | -  | -  |    |    |     |     |
| T | . | . | 1 |   |   |   |   |   |   | . | . | . | . | . |   | 2. | 1. |    |    |     |     |
| i | 0 | 1 | . | . | 6 | 4 | 4 | 2 | 3 | 5 | . | 8 | 8 | 0 | 2 | 9  | 3. | 0. | 3. | 0.0 |     |
|   | 2 | 0 | 6 | 6 |   |   |   |   | 6 | 4 | 9 | 2 | 1 | 7 | 1 | 7  | 9  | 82 | 22 | 2   |     |
|   | 5 | 2 |   |   |   |   |   |   |   |   | 8 | 7 | 5 | 9 | 9 | 3  |    |    |    |     |     |
| W | 1 | 2 |   |   |   |   |   |   |   | 2 | 1 | 7 | 6 | 0 | 0 | -  | -  |    |    |     |     |
| V | . | . | 1 |   |   |   |   |   |   | . | . | . | . | . |   | 3. | 3. |    |    |     |     |
|   | 9 | 0 | . | . | 6 | 5 | 4 | 3 | 3 | 6 | . | 7 | 8 | 5 | 3 | 1  | 3. | 0. | 3. | 0.0 |     |
|   | 9 | 8 | 6 | 5 |   |   |   |   | 6 | 3 | 9 | 4 | 1 | 2 | 5 | 9  | 99 | 73 | 15 | 9   |     |
|   | 4 | 3 | 2 | 3 |   |   |   |   |   |   | 8 | 6 | 5 | 5 | 8 | 0  |    |    |    |     |     |
| W | 2 | 2 | 1 | 1 |   |   |   |   | 2 | 1 | 7 | 7 | 0 |   | - | -  |    |    |    |     |     |
| M | . | . | . | . | 6 | 7 | 4 | 5 | . | . | . | . | . |   | 0 | 3. | 2. | 3. | 0. | 3.  | 0.2 |
| n | 1 | 0 | 6 | 3 |   |   |   |   | 3 | 5 | 9 | 4 | 8 |   | 1 | 3  | 91 | 81 | 01 | 3   |     |

|   |   |   |   |   |   |   |   |   |   |   |   |   |   |   |    |    |    |    |    |     |
|---|---|---|---|---|---|---|---|---|---|---|---|---|---|---|----|----|----|----|----|-----|
|   | 5 | 8 | 2 | 9 |   |   |   |   |   | 6 | 5 | 8 | 3 | 1 |    | 6  | 0  |    |    |     |
|   |   | 1 |   |   |   |   |   |   |   |   |   |   |   |   | 4  | 5  | 5  | 0  |    |     |
| W | 2 | 2 | 1 | 1 |   |   |   |   |   | 2 | 1 | 7 | 7 | 0 | 0  | -  | -  |    |    |     |
| F | . | . | . | . |   |   |   |   |   | . | . | . | . | . | .  | 2. | 1. |    |    |     |
| e | 1 | 0 | 6 | 3 | 6 | 8 | 4 | 6 | 3 | 8 | . | 9 | 8 | 1 | 8  | 9  | 4. | 0. | 2. |     |
|   | 6 | 6 | 2 | 2 |   |   |   |   | 6 | 3 | 8 | 0 | 1 | 5 | 7  | 5  | 19 | 53 | 94 |     |
|   | 2 | 0 |   |   |   |   |   |   |   |   |   | 2 | 5 | 1 | 7  | 8  |    |    |    |     |
| W | 2 | 2 | 1 | 1 |   |   |   |   | 2 | 1 | 7 | 7 | 0 | 0 | -  | -  |    |    |    |     |
| C | . | . | . | . |   |   |   |   | . | . | . | . | . | . | 3. | 2. |    |    |    |     |
| o | 1 | 0 | 6 | 2 | 6 | 9 | 4 | 7 | 3 | 8 | . | 9 | 8 | 8 | 6  | 6  | 4. | 0. | 2. |     |
|   | 8 | 4 | 2 | 6 |   |   |   |   | 6 | 8 | 8 | 8 | 1 | 6 | 9  | 6  | 24 | 48 | 88 |     |
|   | 9 | 2 |   |   |   |   |   |   |   |   |   | 8 | 5 | 2 | 6  | 2  |    |    |    |     |
| W | 2 | 2 | 1 | 1 |   |   |   |   | 2 | 1 | 7 | 7 | 0 | 1 | -  | -  |    |    |    |     |
| N | . | . | . | . |   |   |   |   | . | . | . | . | . | . | 3. | 2. |    |    |    |     |
| i | 2 | 0 | 6 | 2 | 6 | 1 | 4 | 8 | 3 | 9 | . | 6 | 8 | 1 | 6  | 1  | 4. | 0. | 2. |     |
|   | 5 | 1 | 2 | 4 |   |   |   |   | 6 | 1 | 8 | 3 | 1 | 5 | 8  | 1  | 27 | 45 | 86 |     |
|   | 7 | 7 |   |   |   |   |   |   |   |   |   | 9 | 5 | 6 | 3  | 2  |    |    |    |     |
| W | 2 | 2 | 1 | 1 |   |   |   |   | 2 | 1 | 7 | 7 | 0 | 1 | -  | -  |    |    |    |     |
| C | . | . | . | . |   |   |   |   | . | . | . | . | . | . | 2. | 3. |    |    |    |     |
| u | 4 | 0 | 6 | 3 | 6 | 1 | 4 | 0 | 3 | 9 | . | 9 | 7 | 8 | 2  | 4  | 4. | 0. | 2. |     |
|   | 4 | 2 |   |   |   |   |   |   | 6 |   | 8 | 2 | 1 | 3 | 4  | 6  | 26 | 46 | 94 |     |
|   | 1 | 8 | 2 | 2 |   |   |   |   |   |   |   | 6 | 5 | 5 | 2  | 0  |    |    |    |     |
| W | 2 | 2 | 1 | 1 |   |   |   |   | 2 | 1 | 7 | 9 | 0 |   | -  | -  |    |    |    |     |
| Z | . | . | . | . |   |   |   |   | . | . | . | . | . | . | 2. | 6. |    |    |    |     |
| n | 4 | 2 | 6 | 2 | 6 | 1 | 4 | 0 | 3 | 6 | . | 3 | 8 | 0 | 1  | 5  | 4. | 0. | 2. |     |
|   | 8 | 2 | 2 | 2 |   |   |   |   | 6 | 5 | 8 | 9 | 1 |   | 7  | 0  | 01 | 71 | 84 |     |
|   | 2 | 6 |   |   |   |   |   |   |   |   |   | 4 | 5 |   | 7  | 1  |    |    |    |     |
| W | 2 | 2 | 1 | 1 |   |   |   |   | 2 | 1 | 7 | 6 | 0 | 0 | -  | -  |    |    |    |     |
| Z | . | . | . | . |   |   |   |   | . | . | . | . | . | . | 3. | 3. |    |    |    |     |
| r | 1 | 1 | 6 | 7 | 6 | 4 | 4 | 2 | 3 | 3 | . | 9 | 6 | 8 | 4  | 7  | 3. | 1. | 3. |     |
|   | 3 | 1 | 2 | 5 |   |   |   |   | 6 | 3 | 8 | 3 | 1 | 2 | 7  | 3  | 69 | 03 | 37 |     |
|   | 9 | 6 |   |   |   |   |   |   |   |   |   | 4 | 5 | 6 | 2  | 6  |    |    |    |     |
| W | 2 | 2 | 1 | 1 |   |   |   |   | 2 | 1 | 7 | 6 | 0 | 0 | -  | -  |    |    |    |     |
| N | . | . | . | . |   |   |   |   | . | . | . | . | . | . | 2. | 2. |    |    |    |     |
| b | 0 | 0 | 6 | 6 | 6 | 5 | 4 | 5 | 3 | 6 | . | 9 | 7 | 8 | 8  | 3  | 3. | 0. | 3. |     |
|   | 9 | 9 | 2 | 4 |   |   |   |   | 6 |   | 8 | 5 | 1 | 9 | 4  | 6  | 96 | 76 | 26 |     |
|   | 1 | 8 |   |   |   |   |   |   |   |   |   | 8 | 5 | 3 | 4  | 1  |    |    |    |     |
| W | 2 | 2 | 1 | 1 |   |   |   |   | 2 | 2 | 7 | 7 | 0 | 1 | -  | -  |    |    |    |     |
| R | . | . | . | . |   |   |   |   | . | . | . | . | . | . | 4. | 4. |    |    |    |     |
| u | 2 | 0 | 6 | 4 | 6 | 8 | 4 | 7 | 3 | 2 | . | 9 | 3 | 8 | 0  | 2  | 4. | 0. | 3. |     |
|   | 1 | 8 | 2 | 2 |   |   |   |   | 6 |   | 8 | 6 | 1 | 5 | 0  | 0  | 56 | 16 | 04 |     |
|   | 5 | 6 |   |   |   |   |   |   |   |   |   | 1 | 5 | 0 | 8  |    |    |    |    |     |
| W | 2 | 2 | 1 | 1 | 6 | 9 | 4 | 8 | 2 | 2 | 7 | 7 | 0 | 1 | -  | -  | 4. | 0. | 3. |     |
| R | . | . | . | . |   |   |   |   | . | . | . | . | . | . | 4. | 4. | 64 | 08 | 04 | 0.2 |

|    |   |   |   |   |   |   |   |   |   |   |   |   |   |   |    |    |    |    |    |     |  |  |  |  |
|----|---|---|---|---|---|---|---|---|---|---|---|---|---|---|----|----|----|----|----|-----|--|--|--|--|
| h  | 2 | 0 | 6 | 4 |   |   |   |   | 3 | 2 | 9 | 4 | 8 | 1 | 2  | 0  |    |    |    |     |  |  |  |  |
|    | 5 | 7 | 2 | 2 |   |   |   |   | 6 | 8 | 8 | 5 | 1 | 3 | 2  | 0  |    |    |    |     |  |  |  |  |
|    | 9 | 7 |   |   |   |   |   |   |   |   |   | 9 | 5 | 7 | 3  | 5  |    |    |    |     |  |  |  |  |
| W  | 2 | 2 | 1 | 1 |   |   |   |   | 2 | 2 | 7 | 8 | 0 | 0 | -  | -  |    |    |    |     |  |  |  |  |
| P  | . | . | . | . |   |   |   |   | . | . | . | . | . | . | 3. | 4. |    |    |    |     |  |  |  |  |
| d  | 3 | 0 | 6 | 3 | 6 | 1 | 4 | 1 | 3 | 2 | 9 | 3 | 8 | 5 | 7  | 2  | 4. | 0. | 3. | 0.2 |  |  |  |  |
|    | 5 | 8 | 2 | 9 |   | 0 |   | 0 | 6 |   | 8 | 3 | 1 | 6 | 2  | 5  | 56 | 16 | 01 | 3   |  |  |  |  |
|    | 3 | 0 |   |   |   |   |   |   |   |   |   | 7 | 5 | 2 | 8  | 6  |    |    |    |     |  |  |  |  |
| W  | 2 | 3 | 1 | 1 |   |   |   |   | 2 | 1 | 7 | 7 | 0 | 1 | -  | -  |    |    |    |     |  |  |  |  |
| A  | . | . | . | . |   |   |   |   | . | . | . | . | . | . | 2. | 3. |    |    |    |     |  |  |  |  |
| g  | 6 | 0 | . | . | 6 | 1 | 4 | 1 | 3 | 9 | . | 5 | 8 | 3 | 1  | 4  | 4. | 0. | 3. | 0.1 |  |  |  |  |
|    | 0 | 0 | 6 | 4 |   | 1 |   | 0 | 6 | 3 | 9 | 7 | 1 | 0 | 7  | 0  | 29 | 43 | 07 | 7   |  |  |  |  |
|    | 9 | 0 | 2 | 5 |   |   |   |   |   |   | 8 | 6 | 5 | 2 | 0  | 0  |    |    |    |     |  |  |  |  |
| W  | 2 | 2 | 1 |   |   |   |   |   | 2 | 1 | 7 | 7 | 0 | 0 | -  | -  |    |    |    |     |  |  |  |  |
| T  | . | . | . | 1 |   |   |   |   | . | . | . | . | . | . | 2. | 3. |    |    |    |     |  |  |  |  |
| a  | 1 | 0 | 6 | . | 6 | 5 | 4 | 3 | 3 | 5 | . | 8 | 8 | 3 | 9  | 3  | 3. | 0. | 3. | 0.0 |  |  |  |  |
|    | 4 | 8 |   | 7 |   |   |   |   | 6 |   | 9 | 8 | 1 | 2 | 6  | 5  | 86 | 86 | 32 | 8   |  |  |  |  |
|    | 2 | 2 | 2 |   |   |   |   |   |   |   | 8 | 7 | 5 | 2 | 4  | 7  |    |    |    |     |  |  |  |  |
| W  | 2 | 2 | 1 | 1 |   |   |   |   | 2 | 1 | 7 | 7 | 0 | 0 | -  | -  |    |    |    |     |  |  |  |  |
| R  | . | . | . | . |   |   |   |   | . | . | . | . | . | . | 3. | 3. |    |    |    |     |  |  |  |  |
| e  | 2 | 0 | 6 | 5 | 6 | 7 | 4 | 5 | 3 | 9 | . | 8 | 8 | . | 2  | 1  | 4. | 0. | 3. | 0.1 |  |  |  |  |
|    | 4 | 9 | 2 | 1 |   |   |   |   | 6 |   | 9 | 7 | 1 | 5 | 7  | 3  | 26 | 46 | 13 | 1   |  |  |  |  |
|    | 2 | 4 |   |   |   |   |   |   |   |   | 8 | 7 | 5 | 4 | 2  |    |    |    |    |     |  |  |  |  |
| W  | 2 | 2 | 1 | 1 |   |   |   |   | 2 | 2 | 7 | 8 | 0 | - | -  |    |    |    |    |     |  |  |  |  |
| O  | . | . | . | . |   |   |   |   | . | . | . | . | . | . | 4. | 4. |    |    |    |     |  |  |  |  |
| s  | 2 | 0 | 6 | 4 | 6 | 8 | 4 | 6 | 3 | 2 | 9 | 7 | 8 | . | 0  | 4  | 4. | 0. | 3. | 0.1 |  |  |  |  |
|    | 5 | 7 | 2 | 4 |   |   |   |   | 6 |   | 8 | 0 | 1 | 1 | 4  | 1  | 56 | 16 | 06 | 8   |  |  |  |  |
|    | 7 | 6 |   |   |   |   |   |   |   |   |   | 6 | 5 |   | 8  | 8  |    |    |    |     |  |  |  |  |
| W  | 2 | 2 | 1 | 1 |   |   |   |   | 2 | 2 | 7 | 9 | 0 | 1 | -  | -  |    |    |    |     |  |  |  |  |
| Ir | . | . | . | . |   |   |   |   | . | . | . | . | . | . | 4. | 3. |    |    |    |     |  |  |  |  |
|    | 2 | 0 | 6 | 4 | 6 | 9 | 4 | 7 | 3 | 2 | . | 1 | 8 | 5 | 2  | 7  | 4. | 0. | 3. | 0.2 |  |  |  |  |
|    | 9 | 6 | 2 | 1 |   |   |   |   | 6 |   | 9 | 2 | 1 | 6 | 2  | 3  | 56 | 16 | 03 | 1   |  |  |  |  |
|    | 7 | 3 |   |   |   |   |   |   |   |   | 8 | 1 | 5 | 5 | 4  | 8  |    |    |    |     |  |  |  |  |
| W  | 2 | 2 | 1 | 1 |   |   |   |   | 2 | 2 | 7 | 9 | 0 | 2 | -  | -  |    |    |    |     |  |  |  |  |
| P  | . | . | . | . |   |   |   |   | . | . | . | . | . | . | 4. | 4. |    |    |    |     |  |  |  |  |
| t  | 3 | 0 | 6 | 3 | 6 | 1 | 4 | 9 | 3 | 2 | 9 | 0 | 8 | 1 | 3  | 4  | 4. | 0. | 2. | 0.2 |  |  |  |  |
|    | 7 | 6 | 2 | 6 |   |   |   |   | 6 | 8 | 8 | 1 | 1 | 2 | 4  | 2  | 64 | 08 | 98 | 6   |  |  |  |  |
|    | 8 | 1 |   |   |   |   |   |   |   |   |   | 7 | 5 | 8 | 8  | 4  |    |    |    |     |  |  |  |  |
| W  | 2 | 2 | 1 | 1 |   |   |   |   | 2 | 2 | 7 | 9 | 0 | 2 | -  | -  |    |    |    |     |  |  |  |  |
| A  | . | . | . | . |   |   |   |   | . | . | . | . | . | . | 2. | 4. |    |    |    |     |  |  |  |  |
| u  | 5 | 0 | 6 | 3 | 6 | 1 | 4 | 1 | 3 | 5 | . | 2 | 8 | 3 | 5  | 9  | 4. | 0. | 2. | 0.2 |  |  |  |  |
|    | 4 | 7 | 2 | 6 |   |   |   |   | 6 | 4 | 8 | 2 | 1 | 0 | 9  | 5  | 9  | 18 | 98 | 6   |  |  |  |  |
|    | 5 | 3 |   |   |   |   |   |   |   |   |   | 5 | 5 | 9 | 7  | 0  |    |    |    |     |  |  |  |  |
| R  | 2 | 2 | 1 | 1 | 7 | 4 | 5 | 2 | 1 | 1 | 7 | 6 | 0 | 0 | -  | -  | 3. | 0. | 3. | 0.0 |  |  |  |  |

|   |   |   |   |   |   |   |   |   |   |   |   |   |   |   |    |    |    |    |    |     |
|---|---|---|---|---|---|---|---|---|---|---|---|---|---|---|----|----|----|----|----|-----|
| e | . | . | . | . |   |   |   |   | . | . | . | . | . | . | 3. | 2. | 44 | 36 | 11 | 9   |
| T | 0 | 0 | 5 | 6 |   |   |   |   | 9 | 5 | 8 | 8 | 1 | 0 | 7  | 6  |    |    |    |     |
| i | 3 | 9 | 1 |   |   |   |   |   |   | 4 | 7 | 2 | 5 | 7 | 9  | 8  |    |    |    |     |
|   | 2 | 6 |   |   |   |   |   |   |   |   | 7 | 7 |   | 9 | 2  | 5  |    |    |    |     |
| R | 2 | 2 | 1 | 1 |   |   |   |   | 1 | 1 | 7 | 6 | 0 | 0 | -  | -  |    |    |    |     |
| e | . | . | . | . |   |   |   |   | . | . | . | . | . | . | 3. | 2. |    |    |    |     |
| V | 0 | 1 | . | . | 7 | 5 | 5 | 3 | 9 | 6 | 8 | 7 | . | 5 | 7  | 6  | 3. | 0. | 3. | 0.0 |
|   | 9 | 0 | 5 | 5 |   |   |   |   |   | 3 | 7 | 4 | 1 | 2 | 4  | 4  | 53 | 27 | 04 | 2   |
|   | 5 | 3 | 1 | 3 |   |   |   |   |   |   | 7 | 6 | 5 | 5 | 9  | 7  |    |    |    |     |
| R | 2 | 2 | 1 | 1 |   |   |   |   | 1 | 1 | 7 | 7 | 0 |   | -  | -  |    |    |    |     |
| e | . | . | . | . |   |   |   |   | . | . | . | . | . | . | 3. | 3. |    |    |    |     |
| M | 1 | 0 | . | . | 7 | 7 | 5 | 5 | 9 | 5 | 8 | 4 | . | 0 | 3  | 0  | 3. | 0. | 2. | 0.1 |
| n | 4 | 6 | 1 | 9 |   |   |   |   |   | 5 | 7 | 3 | 5 |   | 2  | 4  | 45 | 35 | 9  | 2   |
|   | 1 | 7 |   |   |   |   |   |   |   |   | 7 | 4 |   |   | 6  | 2  |    |    |    |     |
| R | 2 | 2 | 1 | 1 |   |   |   |   | 1 | 1 | 7 | 7 | 0 | 0 | -  | -  |    |    |    |     |
| e | . | . | . | . |   |   |   |   | . | . | . | . | . | . | 3. | 2. |    |    |    |     |
| F | 1 | 0 | . | . | 7 | 8 | 5 | 6 | 9 | 8 | 8 | 9 | . | 1 | 3  | 5  | 3. | 0. | 2. | 0.1 |
| e | 0 | 5 | 5 | 3 |   |   |   |   |   | 3 | 7 | 0 | 5 | 5 | 4  | 7  | 73 | 07 | 83 | 9   |
|   | 5 | 4 | 1 | 2 |   |   |   |   |   |   | 7 | 2 | 5 | 1 | 2  | 7  |    |    |    |     |
| R | 2 | 2 | 1 | 1 |   |   |   |   | 1 | 1 | 7 | 7 | 0 | 0 | -  | -  |    |    |    |     |
| e | . | . | . | . |   |   |   |   | . | . | . | . | . | . | 2. | 2. |    |    |    |     |
| C | 1 | 0 | . | . | 7 | 9 | 5 | 7 | 9 | 8 | 8 | . | . | 6 | 9  | 3  | 3. | 0. | 2. | 0.2 |
| o | 5 | 3 | 1 | 6 |   |   |   |   |   | 8 | 7 | 8 | 5 | 6 | 8  | 1  | 78 | 02 | 77 | 5   |
|   | 6 | 8 |   |   |   |   |   |   |   |   | 7 | 8 | 5 | 2 | 1  | 2  |    |    |    |     |
| R | 2 | 2 | 1 | 1 |   |   |   |   | 1 | 1 | 7 | 7 | 0 | 1 | -  | -  |    |    |    |     |
| e | . | . | . | . |   |   |   |   | . | . | . | . | . | . | 3. | 1. |    |    |    |     |
| N | 3 | 0 | . | . | 7 | 1 | 5 | 8 | 9 | 9 | 8 | 6 | . | 1 | 9  | 9  | 3. | 0. | 2. | 0.2 |
| i | 0 | 0 | 5 | 2 |   | 0 |   |   |   | 1 | 7 | 3 | 1 | 5 | 2  | 7  | 81 | 01 | 75 | 7   |
|   | 8 | 8 | 1 | 4 |   |   |   |   |   |   | 7 | 9 | 5 | 6 | 3  | 1  |    |    |    |     |
| R | 2 | 2 | 1 | 1 |   |   |   |   | 1 | 1 | 7 | 7 | 0 | 1 | -  | -  |    |    |    |     |
| e | . | . | . | . |   |   |   |   | . | . | . | . | . | . | 3. | 3. |    |    |    |     |
| C | 4 | 0 | . | . | 7 | 1 | 5 | 1 | 9 | 9 | 8 | 7 | . | 2 | 1  | 4  | 3. | 0  | 2. | 0.1 |
| u | 3 | 1 | 1 | 2 |   | 1 |   | 0 |   |   | 7 | 2 | 5 | 3 | 9  | 6  | 8  | 0  | 83 | 9   |
|   | 6 | 6 |   |   |   |   |   |   |   |   | 7 | 6 | 5 | 5 | 6  | 1  |    |    |    |     |
| R | 2 | 2 | 1 | 1 |   |   |   |   | 1 | 1 | 7 | 9 | 0 |   | -  | -  |    |    |    |     |
| e | . | . | . | . |   |   |   |   | . | . | . | . | . | . | 3. | 6. |    |    |    |     |
| Z | 3 | 1 | 5 | 2 | 7 | 1 | 5 | 1 | 9 | 6 | 8 | 3 | . | 0 | 0  | 6  | 3. | 0. | 2. | 0.2 |
| n | 3 | 4 | 1 | 2 |   | 2 |   | 0 |   | 5 | 7 | 9 | 1 | 8 | 7  |    | 55 | 25 | 73 | 9   |
|   | 6 | 0 |   |   |   |   |   |   |   |   | 7 | 4 | 5 |   | 0  | 7  |    |    |    |     |
| R | 2 | 2 | 1 | 1 |   |   |   |   | 1 | 1 | 7 | 6 | 0 | 0 | -  | -  |    |    |    |     |
| e | . | . | . | . |   |   |   |   | . | . | . | . | . | . | 4. | 4. |    |    |    |     |
| Z | 1 | 1 | 5 | 7 | 7 | 4 | 5 | 2 | 9 | 3 | 8 | 6 | . | 4 | 6  | 8  | 3. | 0. | 3. | 0.2 |
| r | 3 | 0 | 1 | 5 |   |   |   |   |   | 3 | 7 | 3 | 5 | 2 | 3  | 8  | 23 | 57 | 26 | 4   |
|   | 6 | 3 |   |   |   |   |   |   |   |   | 7 | 4 | 6 | 0 | 0  |    |    |    |    |     |

|   |   |   |   |   |   |   |   |   |   |   |   |   |   |   |    |    |    |    |    |     |
|---|---|---|---|---|---|---|---|---|---|---|---|---|---|---|----|----|----|----|----|-----|
| R | 2 | 2 | 1 | 1 |   |   |   |   | 1 | 1 | 7 | 6 | 0 | 0 | -  | -  |    |    |    |     |
| e | . | . | . | . | 7 | 5 | 5 | 5 | . | . | . | . | . | . | 2. | 2. | 3. | 0. | 3. | 0.1 |
| N | 2 | 1 | 5 | 6 |   |   |   |   | 9 | 6 | 8 | 7 | 1 | 8 | 6  | 0  |    |    |    |     |
| b | 5 | 3 | 1 | 4 |   |   |   |   |   |   | 7 | 5 | 5 | 9 | 0  | 3  | 5  | 3  | 15 | 3   |
|   | 3 | 8 |   |   |   |   |   |   |   |   | 7 | 8 | 3 | 0 | 9  |    |    |    |    |     |
| R | 2 | 2 | 1 | 1 |   |   |   |   | 1 | 2 | 7 | 7 | 0 | 1 | -  | -  |    |    |    |     |
| e | . | . | . | . | 7 | 8 | 5 | 7 | . | . | . | . | . | . | 3. | 2. | 4. | 0. | 2. | 0.0 |
| R | 2 | 0 | 5 | 4 |   |   |   |   | 9 | 2 | 8 | 3 | 1 | 0 | 3  | 9  |    |    |    |     |
| u | 1 | 7 | 1 | 2 |   |   |   |   |   |   | 7 | 6 | 5 | 5 | 8  | 7  | 1  | 3  | 93 | 9   |
|   | 5 |   |   |   |   |   |   |   |   |   | 7 | 1 | 5 | 3 | 9  |    |    |    |    |     |
| R | 2 | 2 | 1 | 1 |   |   |   |   | 1 | 2 | 7 | 7 | 0 | 1 | -  | -  |    |    |    |     |
| e | . | . | . | . | 7 | 9 | 5 | 8 | . | . | . | . | . | . | 3. | 2. | 4. | 0. | 2. | 0.0 |
| R | 2 | 0 | 5 | 4 |   |   |   |   | 9 | 2 | 8 | 4 | 1 | 1 | 6  | 9  |    |    |    |     |
| h | 4 | 6 | 1 | 2 |   |   |   |   |   | 8 | 7 | 5 | 5 | 3 | 2  | 5  | 18 | 38 | 93 | 9   |
|   | 6 | 3 |   |   |   |   |   |   |   |   | 7 | 9 | 7 | 5 | 1  |    |    |    |    |     |
| R | 2 | 2 | 1 | 1 |   |   |   |   | 1 | 2 | 7 | 8 | 0 | 0 | -  | -  |    |    |    |     |
| e | . | . | . | . | 7 | 1 | 5 | 1 | . | . | . | . | . | . | 2. | 3. | 4. | 0. | 2. | 0.1 |
| P | 4 | 0 | 5 | 3 |   |   |   |   | 9 | 2 | 8 | 3 | 1 | 5 | 4  | 4  |    |    |    |     |
| d | 2 | 7 | 1 | 9 |   |   |   |   |   |   | 7 | 3 | 5 | 6 | 3  | 3  | 1  | 3  | 9  | 2   |
|   | 3 | 2 |   |   |   |   |   |   |   |   | 7 | 7 | 2 | 5 | 3  |    |    |    |    |     |
| R | 2 | 2 | 1 | 1 |   |   |   |   | 1 | 1 | 7 | 7 | 0 | 1 | -  | -  |    |    |    |     |
| e | . | . | . | . | 7 | 1 | 5 | 1 | . | . | . | . | . | . | 4. | 3. | 3. | 0. | 2. | 0.0 |
| A | 5 | 2 | 5 | 4 |   |   |   |   | 9 | 9 | 8 | 5 | 1 | 3 | 5  | 6  |    |    |    |     |
| g | 8 | 9 | 1 | 5 |   |   |   |   |   | 3 | 7 | 7 | 5 | 0 | 3  | 0  | 83 | 03 | 96 | 6   |
|   | 7 | 3 |   |   |   |   |   |   |   |   | 7 | 6 | 2 | 5 | 4  |    |    |    |    |     |
| R | 2 | 2 | 1 | 1 |   |   |   |   | 1 | 1 | 7 | 7 | 0 | 0 | -  | -  |    |    |    |     |
| e | . | . | . | . | 7 | 5 | 5 | 3 | . | . | . | . | . | . | 3. | 3. | 3. | 0. | 3. | 0.1 |
| T | 2 | 1 | 5 | 7 |   |   |   |   | 9 | 5 | 8 | 8 | 1 | 3 | 1  | 4  |    |    |    |     |
| a | 8 | 2 | 1 |   |   |   |   |   |   |   | 7 | 8 | 5 | 2 | 9  | 4  | 4  | 4  | 21 | 9   |
|   | 7 | 3 |   |   |   |   |   |   |   |   | 7 | 7 | 2 | 5 | 1  |    |    |    |    |     |
| R | 2 | 2 | 1 | 1 |   |   |   |   | 1 | 2 | 7 | 8 | 0 | 1 | -  | -  |    |    |    |     |
| e | . | . | . | . | 7 | 8 | 5 | 6 | . | . | . | . | . | 1 | 3. | 3. | 4. | 0. | 2. | 0.0 |
| O | 2 | 0 | 5 | 4 |   |   |   |   | 9 | 2 | 8 | 7 | 1 | . | 7  | 6  |    |    |    |     |
| s | 2 | 6 | 1 | 4 |   |   |   |   |   |   | 7 | 0 | 5 | 1 | 2  | 9  | 1  | 3  | 95 | 7   |
|   | 7 | 6 |   |   |   |   |   |   |   |   | 7 | 6 |   |   | 6  | 7  |    |    |    |     |
| R | 2 | 2 | 1 | 1 |   |   |   |   | 1 | 2 | 7 | 9 | 0 | 1 | -  | -  |    |    |    |     |
| e | . | . | . | . | 7 | 9 | 5 | 7 | . | . | . | . | . | . | 4. | 4. | 4. | 0. | 2. | 0.1 |
| r | 2 | 0 | 5 | 4 |   |   |   |   | 9 | 2 | 8 | 1 | 1 | 5 | 7  | 2  |    |    |    |     |
|   | 7 | 5 | 1 | 1 |   |   |   |   |   |   | 7 | 2 | 5 | 6 | 8  | 6  | 1  | 3  | 92 |     |
|   | 8 | 3 |   |   |   |   |   |   |   |   | 7 | 1 | 5 | 5 | 6  | 6  |    |    |    |     |
| R | 2 | 2 | 1 | 1 |   |   |   |   | 1 | 2 | 7 | 9 | 0 | 2 | -  | -  |    |    |    |     |
| e | . | . | . | . | 7 | 1 | 5 | 9 | . | . | . | . | . | . | 2. | 3. | 4. | 0. | 2. | 0.1 |
| P | 4 | 0 | 5 | 3 |   |   |   |   | 9 | 2 | 8 | 0 | 1 | 1 | 5  | 6  |    |    |    |     |
| t | 4 | 5 | 1 | 6 |   |   |   |   |   | 8 | 7 | 1 | 5 | 2 | 4  | 3  | 18 | 38 | 87 | 5   |

|   |   |   |   |   |   |   |   |   |   |   |   |   |   |   |    |    |    |    |    |     |
|---|---|---|---|---|---|---|---|---|---|---|---|---|---|---|----|----|----|----|----|-----|
|   | 6 | 4 |   |   |   |   |   |   | 7 | 7 | 8 | 5 | 1 |   |    |    |    |    |    |     |
| R | 2 | 2 | 1 | 1 |   |   |   |   | 1 | 2 | 7 | 9 | 0 | 2 | -  | -  |    |    |    |     |
| e | . | . | . | . | 7 | 1 | 5 | 1 | . | . | . | . | . | . | 2. | 5. |    |    |    |     |
| A | 5 | 0 | 5 | 3 |   |   |   |   | 9 | 5 | 8 | 2 | . | 3 | 7  | 2  | 4. | 0. | 2. | 0.1 |
| u | 0 | 5 | 1 | 6 |   |   |   |   | 4 | 7 | 2 | 5 | 1 | 0 | 5  | 3  | 44 | 64 | 87 | 5   |
|   | 5 | 2 |   |   |   |   |   |   |   | 7 | 5 |   | 5 | 9 | 0  | 8  |    |    |    |     |
| O | 2 | 2 | 1 | 1 |   |   |   |   | 2 | 1 | 8 | 6 |   | 0 | -  | -  |    |    |    |     |
| s | . | . | . | . |   |   |   |   | . | . | . | . | 1 | . | 3. | 2. |    |    |    |     |
| T | 1 | 1 | 4 | . | 8 | 4 | 6 | 2 | 2 | 5 | 7 | 8 | . | 0 | 0  | 4  | 3. | 0. | 3. | 0.1 |
| i | 5 | 0 | 4 | 6 |   |   |   |   | 4 | 0 | 2 | 1 | 7 | 5 | 3  |    | 74 | 66 | 04 | 6   |
|   | 6 | 9 |   |   |   |   |   |   |   | 6 | 7 |   |   | 9 | 7  | 3  |    |    |    |     |
| O | 2 | 2 | 1 | 1 |   |   |   |   | 2 | 1 | 8 | 6 |   | 0 | -  | -  |    |    |    |     |
| s | . | . | . | . |   |   |   |   | . | . | . | . | 1 | . | 3. | 2. |    |    |    |     |
| V | 1 | 0 | 4 | 5 | 8 | 5 | 6 | 3 | 2 | 6 | 7 | 7 | . | 5 | 2  | 7  | 3. | 0. | 2. | 0.0 |
|   | 2 | 8 | 4 | 3 |   |   |   |   |   | 3 | 0 | 4 | 1 | 2 | 8  | 7  | 83 | 57 | 97 | 9   |
|   | 2 | 9 |   |   |   |   |   |   |   | 6 | 6 |   |   | 5 | 7  | 3  |    |    |    |     |
| O | 2 | 2 | 1 | 1 |   |   |   |   | 2 | 1 | 8 | 7 |   |   | -  | -  |    |    |    |     |
| s | . | . | . | . |   |   |   |   | . | . | . | . | 1 | . | 2. | 1. |    |    |    |     |
| M | 2 | 0 | 4 | 3 | 8 | 7 | 6 | 5 | 2 | 5 | 7 | 4 | . | 0 | 3  | 8  | 3. | 0. | 2. | 0.0 |
| n | 3 | 5 | 4 | 9 |   |   |   |   |   | 5 | 0 | 3 | 1 |   | 2  | 0  | 75 | 65 | 83 | 5   |
|   | 6 | 1 |   |   |   |   |   |   |   | 6 | 4 |   |   |   | 3  | 9  |    |    |    |     |
| O | 2 | 2 | 1 | 1 |   |   |   |   | 2 | 1 | 8 | 7 |   | 0 | -  | -  |    |    |    |     |
| s | . | . | . | . |   |   |   |   | . | . | . | . | 1 | . | 3. | 2. |    |    |    |     |
| F | 1 | 0 | 4 | 3 | 8 | 8 | 6 | 6 | 2 | 8 | 7 | 9 | . | 1 | 5  | 3  | 4. | 0. | 2. | 0.1 |
| e | 6 | 4 | 4 | 2 |   |   |   |   |   | 3 | 0 | 0 | 1 | 5 | 5  | 0  | 03 | 37 | 76 | 2   |
|   | 4 | 0 |   |   |   |   |   |   |   | 6 | 2 |   |   | 1 | 3  | 0  |    |    |    |     |
| O | 2 | 2 | 1 | 1 |   |   |   |   | 2 | 1 | 8 | 7 |   | 0 | -  | -  |    |    |    |     |
| s | . | . | . | . |   |   |   |   | . | . | . | . | 1 | . | 3. | 2. |    |    |    |     |
| C | 2 | 0 | 4 | 2 | 8 | 9 | 6 | 7 | 2 | 8 | 7 | . | . | 6 | 1  | 0  | 4. | 0. | 2. | 0.1 |
| o | 1 | 2 | 4 | 6 |   |   |   |   |   | 8 | 0 | 8 | 1 | 6 | 3  | 8  | 08 | 32 | 7  | 8   |
|   | 1 | 3 |   |   |   |   |   |   |   | 6 | 8 |   |   | 2 | 0  | 5  |    |    |    |     |
| O | 2 | 1 | 1 | 1 |   |   |   |   | 2 | 1 | 8 | 7 |   | 1 | -  | -  |    |    |    |     |
| s | . | . | . | . |   |   |   |   | . | . | . | . | 1 | . | 2. | 1. |    |    |    |     |
| N | 3 | 9 | 4 | 2 | 8 | 1 | 6 | 8 | 2 | 9 | 7 | 6 | . | 1 | 8  | 8  | 4. | 0. | 2. | 0.2 |
| i | 1 | 9 | 4 | 4 |   | 0 |   |   |   | 1 | 0 | 3 | 1 | 5 | 6  | 0  | 11 | 29 | 68 |     |
|   | 9 | 9 |   |   |   |   |   |   |   | 6 | 9 |   |   | 6 | 8  | 7  |    |    |    |     |
| O | 2 | 2 | 1 | 1 |   |   |   |   | 2 | 1 | 8 | 7 |   | 1 | -  | -  |    |    |    |     |
| s | . | . | . | . |   |   |   |   | . | . | . | . | 1 | . | 3. | 3. |    |    |    |     |
| C | 4 | 0 | 4 | 3 | 8 | 1 | 6 | 1 | 2 | 9 | 7 | 7 | . | 2 | 7  | 1  | 4. | 0. | 2. | 0.1 |
| u | 7 | 0 | 4 | 2 |   |   |   |   |   | 0 | 2 | 1 | 3 | 2 | 4  |    | 1  | 3  | 76 | 2   |
|   | 1 | 8 |   |   |   |   |   |   |   | 6 | 6 |   |   | 5 | 1  | 6  |    |    |    |     |
| O | 2 | 2 | 1 | 1 |   |   |   |   | 2 | 1 | 8 | 9 | 1 |   | -  | -  |    |    |    |     |
| s | . | . | . | . | 8 | 1 | 6 | 1 | . | . | . | . | . | 0 | 3. | 6. |    |    |    |     |
| Z | 4 | 1 | 4 | 2 |   | 2 |   | 0 | 2 | 6 | 7 | 3 | 1 |   | 4  | 7  | 85 | 55 | 66 | 2   |



|    |   |   |   |   |   |   |   |   |   |   |   |   |   |   |    |      |    |    |    |     |           |
|----|---|---|---|---|---|---|---|---|---|---|---|---|---|---|----|------|----|----|----|-----|-----------|
| n  | 3 | 5 | 4 | 2 |   |   |   |   | 5 | 0 | 9 |   |   | 0 | 5  |      |    |    |    |     |           |
|    | 2 | 7 |   |   |   |   |   |   |   | 6 | 4 |   |   | 4 | 8  |      |    |    |    |     |           |
| O  | 2 | 2 | 1 | 1 |   |   |   |   | 2 | 1 | 8 | 6 |   | 0 | -  | -    |    |    |    |     |           |
| s  | . | . | . | . |   |   |   |   | . | . | . | . | 1 | . | 2. | 3.   |    |    |    |     |           |
| Z  | 3 | 1 | . | . | 8 | 4 | 6 | 2 | 2 | 3 | 7 | 6 | . | 4 | 9  | 6    | 3. | 0. | 3. | 0.3 |           |
| r  | 4 | 6 | 4 | 5 |   |   |   |   |   | 3 | 0 | 3 | 1 | 2 | 3  | 4    | 53 | 87 | 19 | 1   |           |
|    | 9 | 1 |   |   |   |   |   |   |   |   | 6 | 4 |   | 6 | 6  | 8    |    |    |    |     |           |
| O  | 2 | 2 | 1 | 1 |   |   |   |   | 2 | 1 | 8 | 6 |   | 0 | -  | -    |    |    |    |     |           |
| s  | . | . | . | . |   |   |   |   | . | . | . | . | 1 | . | 3. | 3.   |    |    |    |     |           |
| N  | 2 | 1 | . | . | 8 | 5 | 6 | 5 | 2 | 6 | 7 | 7 | . | 8 | 1  | 5    | 3. | 0. | 3. | 0.2 |           |
| b  | 4 | 2 | 4 | 4 |   |   |   |   |   |   | 0 | 5 | 1 | 9 | 3  | 4    | 8  | 6  | 08 |     |           |
|    | 6 | 0 |   |   |   |   |   |   |   |   | 6 | 8 |   | 3 | 1  | 5    |    |    |    |     |           |
| O  | 2 | 2 | 1 | 1 |   |   |   |   | 2 | 2 | 8 | 7 |   | 1 | -  | -    |    |    |    |     |           |
| s  | . | . | . | . |   |   |   |   | . | . | . | . | 1 | . | 3. | 2.   |    |    |    |     |           |
| R  | 2 | 0 | . | . | 8 | 8 | 6 | 7 | 2 | 2 | 7 | 3 | . | . | 3  | 9    | 4. | 0  | 2. | 0.0 |           |
| u  | 7 | 5 | 4 | 2 |   |   |   |   |   |   | 0 | 6 | 1 | 0 | 0  | 7    | 4  |    | 86 | 2   |           |
|    | 2 | 7 |   |   |   |   |   |   |   |   | 6 | 1 |   | 5 | 9  | 1    |    |    |    |     |           |
| O  | 2 | 2 | 1 | 1 |   |   |   |   | 2 | 2 | 8 | 7 |   | 1 | -  | -    |    |    |    |     |           |
| s  | . | . | . | . |   |   |   |   | . | . | . | . | 1 | . | 3. | 3.   |    |    |    |     |           |
| R  | 3 | 0 | . | . | 8 | 9 | 6 | 8 | 2 | 2 | 7 | 4 | . | 1 | 3  | 2    | 4. | 0. | 2. | 0.0 |           |
| h  | 4 | 4 | 4 | 4 |   |   |   |   |   | 8 | 0 | 5 | 1 | 3 | 4  | 5    | 48 | 08 | 86 | 2   |           |
|    | 8 | 7 |   |   |   |   |   |   |   |   | 6 | 9 |   | 7 | 1  | 6    |    |    |    |     |           |
| O  | 2 | 2 | 1 | 1 |   |   |   |   | 2 | 2 | 8 | 8 |   | 0 | -  | -    |    |    |    |     |           |
| s  | . | . | . | . |   |   |   |   | . | . | . | . | 1 | . | 3. | 3.   |    |    |    |     |           |
| P  | 4 | 0 | . | . | 8 | 1 | 6 | 1 | 2 | 2 | 7 | 3 | . | 5 | 6  | 0    | 4. | 0  | 2. | 0.0 |           |
| d  | 8 | 5 | 4 | 3 |   |   |   |   |   |   | 0 | 3 | 1 | 6 | 9  | 8    | 4  |    | 83 | 5   |           |
|    | 2 | 8 |   |   |   |   |   |   |   |   | 6 | 7 |   | 2 | 5  | 7    |    |    |    |     |           |
| O  | 2 | 2 | 1 | 1 |   |   |   |   | 2 | 1 | 8 | 7 |   | 1 | -  | -    |    |    |    |     |           |
| s  | . | . | . | . |   |   |   |   | . | . | . | . | 1 | . | 3. | 3.   |    |    |    |     |           |
| A  | 5 | 2 | . | . | 8 | 1 | 6 | 1 | 2 | 9 | 7 | 5 | . | 3 | 5  | 6    | 4. | 0. | 2. | 0.0 |           |
| g  | 8 | 2 | 4 | 4 |   |   |   |   |   | 3 | 0 | 7 | 1 | 0 | 1  | 4    | 13 | 27 | 89 | 1   |           |
|    | 5 | 0 |   |   |   |   |   |   |   |   | 6 | 6 |   | 2 | 0  | 7    |    |    |    |     |           |
| O  | 2 | 2 | 1 | 1 |   |   |   |   | 2 | 1 | 8 | 7 |   | 0 | -  | -    |    |    |    |     |           |
| s  | . | . | . | . |   |   |   |   | . | . | . | . | 1 | . | 2. | 3.   |    |    |    |     |           |
| T  | 2 | 1 | . | . | 8 | 5 | 6 | 3 | 2 | 5 | 7 | 8 | . | 3 | 9  | 5    | 3. | 0. | 3. | 0.2 |           |
| a  | 7 | 0 | 4 | 7 |   |   |   |   |   |   | 0 | 8 | 1 | 2 | 2  | 9    | 7  | 7  | 14 | 6   |           |
|    | 7 | 5 |   |   |   |   |   |   |   |   | 6 | 7 |   | 2 | 9  | 2    |    |    |    |     |           |
| O  | 2 | 2 | 1 | 1 |   |   |   |   | 2 | 2 | 8 | 9 |   | 1 | -  | -    |    |    |    |     |           |
| sI | . | . | . | . |   |   |   |   | . | . | . | . | 1 | . | 3. | 3.   |    |    |    |     |           |
| r  | 3 | 0 | . | . | 8 | 9 | 6 | 7 | 2 | 2 | 7 | 1 | . | 5 | 3  | 3    | 4. | 0  | 2. | 0.0 |           |
|    | 6 | 3 | 4 | 4 |   |   |   |   |   |   | 0 | 2 | 1 | 6 | 0  | 3    | 4  |    | 85 | 3   |           |
|    | 8 | 5 |   |   |   |   |   |   |   |   | 6 | 1 |   | 5 | 0  | 4    |    |    |    |     |           |
| O  | 2 | 2 | 1 | 1 |   |   |   |   | 8 | 1 | 6 | 9 | 2 | 2 | 8  | 9    | 1  | 2  | -  | -   | 4.0.2.0.0 |
| s  | . | . | . | . |   |   |   |   |   |   | . | . | . | . | .  | 1.3. | 48 | 08 | 8  | 8   |           |

|    |   |   |   |   |   |   |   |   |   |   |   |   |   |    |    |    |    |    |     |
|----|---|---|---|---|---|---|---|---|---|---|---|---|---|----|----|----|----|----|-----|
| P  | 4 | 0 | 4 | 3 |   |   |   | 2 | 2 | 7 | 0 | 1 | 1 | 7  | 6  |    |    |    |     |
| t  | 9 | 3 | 4 | 6 |   |   |   |   | 8 | 0 | 1 |   | 2 | 2  | 0  |    |    |    |     |
|    | 7 | 5 |   |   |   |   |   |   |   | 6 | 7 |   | 8 | 4  | 4  |    |    |    |     |
| O  | 2 | 2 | 1 | 1 |   |   |   | 2 | 2 | 8 | 9 |   | 2 | -  | -  |    |    |    |     |
| s  | . | . | . | . | 8 | 1 | 6 | 1 | . | . | . | . | 1 | .  | 1. | 4. | 4. | 0. | 2.  |
| A  | 5 | 0 | 4 | 3 | 1 | 6 | 0 | 2 | 5 | 7 | 2 | . | 3 | 2  | 5  | 74 | 34 | 8  | 0.0 |
| u  | 3 | 4 | 4 | 6 |   |   |   |   | 4 | 0 | 2 | 1 | 0 | 4  | 5  |    |    |    |     |
|    | 4 | 6 |   |   |   |   |   |   |   | 6 | 5 |   | 9 | 0  | 3  |    |    |    |     |
| Ir | 2 | 2 | 1 |   |   |   |   | 2 | 1 | 9 | 6 | 1 | 0 | -  | -  |    |    |    |     |
| T  | . | . | 1 | 1 |   |   |   | . | . | . | . | . | . | 3. | 2. |    |    |    |     |
| i  | 1 | 1 | . | . | 9 | 4 | 7 | 2 | 2 | 5 | 1 | 8 | 5 | 0  | 9  | 6  | 3. | 0. | 3.  |
|    | 9 | 0 | 1 | 6 |   |   |   |   | 4 | 2 | 2 | 6 | 7 | 9  | 6  | 74 | 66 | 01 | 0.1 |
|    | 9 | 2 |   |   |   |   |   |   |   | 1 | 7 | 5 | 9 | 5  | 0  |    |    |    |     |
| Ir | 2 | 2 | 1 | 1 |   |   |   | 2 | 1 | 9 | 6 | 1 | 0 | -  | -  |    |    |    |     |
| V  | . | . | . | . | 9 | 5 | 7 | 3 | . | . | . | . | . | .  | 3. | 3. | 3. | 0. | 2.  |
|    | 1 | 0 | 4 | 5 | 2 | 6 | 1 | 7 | 5 | 5 | 5 | 9 | 1 |    |    | 83 | 57 | 94 | 0.1 |
|    | 8 | 7 | 1 | 3 |   |   |   | 3 | 2 | 4 | 6 | 2 | 0 | 6  |    |    |    |    | 2   |
|    | 9 | 7 |   |   |   |   |   |   |   | 1 | 6 | 5 | 5 | 6  | 5  |    |    |    |     |
| Ir | 2 | 2 | 1 | 1 |   |   |   | 2 | 1 | 9 | 7 | 1 |   | -  | -  |    |    |    |     |
| M  | . | . | . | . |   |   |   | . | . | . | . | . | . | 4. | 3. |    |    |    |     |
| n  | 3 | 0 | 4 | 3 | 9 | 7 | 7 | 5 | 2 | 5 | 1 | 4 | 5 | 0  | 3  | 1  | 3. | 0. | 2.  |
|    | 3 | 4 | 1 | 9 |   |   |   |   | 5 | 2 | 3 | 6 |   | 1  | 3  | 75 | 65 | 8  | 0.0 |
|    | 2 |   |   |   |   |   |   |   |   | 1 | 4 | 5 |   | 2  | 0  |    |    |    | 2   |
| Ir | 2 | 2 | 1 | 1 |   |   |   | 2 | 1 | 9 | 7 | 1 | 0 | -  | -  |    |    |    |     |
| F  | . | . | . | . |   |   |   | . | . | . | . | . | . | 2. | 2. |    |    |    |     |
| e  | 2 | 0 | 4 | 3 | 9 | 8 | 7 | 6 | 2 | 8 | 1 | 9 | 5 | 1  | 8  | 3  | 4. | 0. | 2.  |
|    | 8 | 1 | 1 | 2 |   |   |   |   | 3 | 2 | 0 | 6 | 5 | 5  | 7  | 03 | 37 | 73 | 0.0 |
|    | 2 | 9 |   |   |   |   |   |   |   | 1 | 2 | 5 | 1 | 4  | 2  |    |    |    | 9   |
| Ir | 2 | 2 | 1 | 1 |   |   |   | 2 | 1 | 9 | 7 | 1 | 0 | -  | -  |    |    |    |     |
| C  | . | . | . | . |   |   |   | . | . | . | . | . | . | 3. | 2. |    |    |    |     |
| o  | 2 | 0 | 4 | 2 | 9 | 9 | 7 | 7 | 2 | 8 | 1 | . | 5 | 6  | 2  | 4  | 4. | 0. | 2.  |
|    | 9 | 0 | 1 | 6 |   |   |   |   | 8 | 2 | 8 | 6 | 6 | 9  | 8  | 08 | 32 | 67 | 0.1 |
|    | 4 | 6 |   |   |   |   |   |   |   | 1 | 8 | 5 | 2 | 8  | 7  |    |    |    | 5   |
| Ir | 2 | 1 | 1 | 1 |   |   |   | 2 | 1 | 9 | 7 | 1 | 1 | -  | -  |    |    |    |     |
| N  | . | . | . | . |   |   |   | . | . | . | . | . | . | 2. | 1. |    |    |    |     |
| i  | 4 | 9 | 4 | 2 | 9 | 1 | 7 | 8 | 2 | 9 | 1 | 6 | 5 | 1  | 2  | 5  | 4. | 0. | 2.  |
|    | 0 | 8 | 1 | 4 |   |   |   |   | 1 | 2 | 3 | 6 | 5 | 4  | 1  | 11 | 29 | 65 | 0.1 |
|    | 3 | 4 |   |   |   |   |   |   |   | 1 | 9 | 5 | 6 | 4  | 6  |    |    |    | 7   |
| Ir | 2 | 1 | 1 | 1 |   |   |   | 2 | 1 | 9 | 7 | 1 | 1 | -  | -  |    |    |    |     |
| C  | . | . | . | . |   |   |   | . | . | . | . | . | . | 2. | 3. |    |    |    |     |
| u  | 4 | 9 | 4 | 3 | 9 | 1 | 7 | 1 | 2 | 9 | 1 | 7 | 5 | 2  | 7  | 2  | 4. | 0. | 2.  |
|    | 4 | 8 | 1 | 2 |   |   |   |   |   | 2 | 2 | 6 | 3 | 0  | 3  | 1  | 3  | 73 | 0.0 |
|    | 9 | 8 |   |   |   |   |   |   |   | 1 | 6 | 5 | 5 | 8  | 7  |    |    |    | 9   |
| Ir | 2 | 2 | 1 | 1 | 9 | 1 | 7 | 1 | 2 | 1 | 9 | 9 | 1 | 0  | -  | -  | 3. | 0. | 2.  |

|    |   |   |   |   |   |   |   |   |   |   |   |    |    |    |    |    |    |    |    |     |
|----|---|---|---|---|---|---|---|---|---|---|---|----|----|----|----|----|----|----|----|-----|
| Z  | . | . | . | . | 2 | 0 | . | . | . | . | . | 3. | 6. | 85 | 55 | 63 | 9  |    |    |     |
| n  | 3 | 0 | 4 | 2 |   |   | 2 | 6 | 1 | 3 | 5 | 8  | 5  |    |    |    |    |    |    |     |
|    | 8 | 3 | 1 | 2 |   |   |   | 5 | 2 | 9 | 6 | 5  | 0  |    |    |    |    |    |    |     |
|    | 6 | 5 |   |   |   |   |   |   |   | 1 | 4 | 5  | 8  | 1  |    |    |    |    |    |     |
| Ir | 2 | 2 | 1 | 1 |   |   | 2 | 1 | 9 | 6 | 1 | 0  | -  | -  |    |    |    |    |    |     |
| N  | . | . | . | . |   |   | . | . | . | . | . | .  | 5. | 4. |    |    |    |    |    |     |
| b  | 2 | 1 | . | . | 9 | 5 | 7 | 5 | 2 | 6 | 1 | 7  | 5  | 8  | 1  | 9  | 3. | 0. | 3. | 0.2 |
|    | 9 | 0 | 4 | 6 |   |   |   |   |   |   | 2 | 5  | 6  | 9  | 8  | 4  | 8  | 6  | 05 | 3   |
|    |   | 3 | 1 | 4 |   |   |   |   |   |   | 1 | 8  | 5  | 3  | 1  | 1  |    |    |    |     |
| Ir | 2 | 2 | 1 | 1 |   |   | 2 | 2 | 9 | 7 | 1 | 1  | -  | -  |    |    |    |    |    |     |
| R  | . | . | . | . |   |   | . | . | . | . | . | .  | 3. | 3. |    |    |    |    |    |     |
| h  | 3 | 0 | . | . | 9 | 9 | 7 | 8 | 2 | 2 | 1 | 4  | 5  | 1  | 7  | 1  | 4. | 0. | 2. | 0.0 |
|    | 3 | 3 | 1 | 2 |   |   |   |   | 8 | 2 | 5 | 6  | 3  | 2  | 4  |    | 48 | 08 | 83 | 1   |
|    |   | 7 |   |   |   |   |   |   |   | 1 | 9 | 5  | 7  | 7  | 2  |    |    |    |    |     |
| Ir | 2 | 2 | 1 | 1 |   |   | 2 | 2 | 9 | 8 | 1 | 0  | -  | -  |    |    |    |    |    |     |
| P  | . | . | . | . |   |   | . | . | . | . | . | .  | 4. | 3. |    |    |    |    |    |     |
| d  | 4 | 0 | . | . | 9 | 1 | 7 | 1 | 2 | 2 | 1 | 3  | 5  | 5  | 4  | 5  | 4. | 0  | 2. | 0.0 |
|    | 8 | 4 | 4 | 3 |   | 0 |   | 0 |   |   | 2 | 3  | 6  | 6  | 3  | 4  | 4  |    | 8  | 2   |
|    | 4 | 7 | 1 | 9 |   |   |   |   |   | 1 | 7 | 5  | 2  | 9  | 0  |    |    |    |    |     |
| Ir | 2 | 2 | 1 | 1 |   |   | 2 | 1 | 9 | 7 | 1 | 1  | -  | -  |    |    |    |    |    |     |
| A  | . | . | . | . |   |   | . | . | . | . | . | .  | 3. | 4. |    |    |    |    |    |     |
| g  | 4 | 0 | . | . | 9 | 1 | 7 | 1 | 2 | 9 | 1 | 5  | 5  | 3  | 8  | 9  | 4. | 0. | 2. | 0.0 |
|    | 9 | 5 | 4 | 4 |   | 1 |   | 0 |   | 3 | 2 | 7  | 6  | 0  | 1  | 7  | 13 | 27 | 86 | 4   |
|    | 7 | 6 | 1 | 5 |   |   |   |   |   | 1 | 6 | 5  | 2  | 0  | 3  |    |    |    |    |     |
| Ir | 2 | 2 | 1 | 1 |   |   | 2 | 1 | 9 | 7 | 1 | 0  | -  | -  |    |    |    |    |    |     |
| T  | . | . | . | . |   |   | . | . | . | . | . | .  | 3. | 3. |    |    |    |    |    |     |
| a  | 3 | 0 | . | . | 9 | 5 | 7 | 3 | 2 | 5 | 1 | 8  | 5  | 3  | 5  | 8  | 3. | 0. | 3. | 0.2 |
|    | 1 | 9 | 4 | 7 |   |   |   |   |   |   | 2 | 8  | 6  | 2  | 1  | 6  | 7  | 7  | 11 | 9   |
|    | 7 | 0 | 1 |   |   |   |   |   |   | 1 | 7 | 5  | 2  | 6  | 8  |    |    |    |    |     |
| Ir | 2 | 2 | 1 | 1 |   |   | 2 | 2 | 9 | 9 | 1 | 2  | -  | -  |    |    |    |    |    |     |
| P  | . | . | . | . |   |   | . | . | . | . | . | .  | 2. | 2. |    |    |    |    |    |     |
| t  | 5 | 0 | . | . | 9 | 1 | 7 | 9 | 2 | 2 | 1 | 0  | 5  | 1  | 8  | 7  | 4. | 0. | 2. | 0.0 |
|    | 0 | 2 | 4 | 3 |   | 0 |   |   | 8 | 2 | 1 | 6  | 2  | 4  | 7  |    | 48 | 08 | 77 | 5   |
|    | 5 | 9 | 1 | 6 |   |   |   |   |   | 1 | 7 | 5  | 8  | 8  | 6  |    |    |    |    |     |
| P  | 2 | 1 | 1 | 1 |   |   | 2 | 1 | 9 | 7 | 2 | 0  | -  | -  |    |    |    |    |    |     |
| t  | . | . | . | . |   |   | . | . | . | . | . | .  | 3. | 2. |    |    |    |    |    |     |
| C  | 3 | 9 | 3 | 2 | 1 | 9 | 9 | 7 | 2 | 8 | 0 | 8  | 1  | 6  | 0  | 1  | 4. | 0. | 2. | 0.1 |
| o  | 8 | 9 | 6 | 6 | 0 |   |   |   | 8 | 8 | 1 | 8  | 2  | 6  | 7  | 8  | 16 | 4  | 62 |     |
|    | 8 | 3 |   |   |   |   |   |   | 7 | 8 | 8 | 2  | 6  | 8  |    |    |    |    |    |     |
| P  | 2 | 1 | 1 | 1 |   |   | 2 | 1 | 9 | 7 | 2 | 1  | -  | -  |    |    |    |    |    |     |
| t  | . | . | . | . |   |   | . | . | . | . | . | .  | 4. | 3. |    |    |    |    |    |     |
| N  | 3 | 9 | . | . | 1 | 1 | 9 | 8 | 2 | 9 | 0 | 6  | 1  | 1  | 0  | 4  | 4. | 0. | 2. | 0.1 |
| i  | 9 | 9 | 3 | 2 | 0 | 0 |   |   | 8 | 1 | 1 | 3  | 2  | 5  | 9  | 1  | 19 | 37 | 6  | 2   |
|    | 9 | 1 | 6 | 4 |   |   |   |   |   | 7 | 9 | 8  | 6  | 8  | 7  |    |    |    |    |     |

|         |   |   |   |   |   |   |   |   |   |   |   |   |   |   |   |   |    |    |    |    |    |     |
|---------|---|---|---|---|---|---|---|---|---|---|---|---|---|---|---|---|----|----|----|----|----|-----|
| AuTiAuv | 2 | 2 | 1 | 1 | 1 | 4 | 1 | 2 | 2 | 1 | 9 | 6 | 2 | 0 | - | - | 4. | 2. | 4. | 1  | 2. | 0.2 |
|         | 4 | 0 | 3 | 6 | 1 |   | 0 | 2 | 5 | 5 | 2 | 8 | 3 | 0 | 6 | 2 | 08 |    | 96 |    | 4  |     |
|         | 8 | 8 | 3 | 6 | 1 |   |   |   | 4 | 4 | 2 | 2 | 0 | 7 | 4 | 2 |    |    |    |    |    |     |
|         | 3 | 3 | 6 |   |   |   |   |   |   |   | 5 | 7 | 9 | 9 | 7 | 9 |    |    |    |    |    |     |
| AuMn    | 2 | 2 | 1 | 1 | 1 | 7 | 1 | 5 | 2 | 1 | 9 | 7 | 2 |   | - | - | 4. | 0. | 2. | 0. | 2. | 0.1 |
|         | 4 | 0 | 3 | 3 | 1 |   | 0 | 3 | 5 | 6 | 2 | 7 | 3 | 5 | 7 | 3 | 17 | 91 | 89 |    | 7  |     |
|         | 0 | 4 | 6 | 3 |   |   |   |   | 4 | 3 | 2 | 4 | 0 | 2 | 5 | 5 |    |    |    |    |    |     |
|         | 7 | 1 |   |   |   |   |   |   |   |   | 5 | 6 | 9 | 5 | 5 | 1 |    |    |    |    |    |     |
| AuFe    | 2 | 2 | 1 | 1 | 1 | 8 | 1 | 6 | 2 | 1 | 9 | 7 | 2 | 0 | - | - | 4. | 0. | 2. | 0. | 4. | 0.0 |
|         | 4 | 0 | 3 | 3 | 1 |   | 0 | 5 | 5 | 5 | 2 | 4 | 3 | 0 | 0 | 2 | 09 | 99 | 75 |    | 3  |     |
|         | 1 | 1 | 6 | 9 |   |   |   |   | 4 | 5 | 2 | 3 | 0 |   | 7 | 4 |    |    |    |    |    |     |
|         | 4 | 6 |   |   |   |   |   |   |   |   | 5 | 4 | 9 |   | 9 | 3 |    |    |    |    |    |     |
| AuCo    | 2 | 2 | 1 | 1 | 1 | 9 | 1 | 7 | 2 | 1 | 9 | 7 | 2 | 0 | - | - | 4. | 0. | 2. | 0. | 4. | 0.1 |
|         | 4 | 9 | 3 | 2 | 1 |   | 0 | 7 | 5 | 8 | 2 | 8 | 3 | 6 | 6 | 0 | 42 | 66 | 62 |    |    |     |
|         | 1 | 9 | 6 | 6 |   |   |   |   | 4 | 8 | 2 | 8 | 0 | 6 | 7 | 6 |    |    |    |    |    |     |
|         | 2 | 7 |   |   |   |   |   |   |   |   | 5 | 8 | 9 | 2 | 0 | 4 |    |    |    |    |    |     |
| AuNi    | 2 | 2 | 1 | 1 | 1 | 1 | 1 | 8 | 2 | 1 | 9 | 7 | 2 | 1 | - | - | 4. | 0. | 2. | 0. | 4. | 0.1 |
|         | 4 | 0 | 3 | 2 | 1 | 0 | 0 | 8 | 5 | 9 | 2 | 6 | 3 | 1 | 3 | 5 | 45 | 63 | 6  |    | 2. | 0.1 |
|         | 0 | 0 | 6 | 4 |   |   |   |   | 4 | 1 | 2 | 3 | 0 | 5 | 1 | 2 |    |    |    |    |    |     |
|         | 3 | 7 |   |   |   |   |   |   |   |   | 5 | 9 | 9 | 6 | 9 | 2 |    |    |    |    |    |     |
| AuCu    | 2 | 2 | 1 | 1 | 1 | 1 | 1 | 1 | 2 | 1 | 9 | 7 | 2 | 1 | - | - | 4. | 0. | 2. | 0. | 4. | 0.0 |
|         | 4 | 0 | 3 | 3 | 1 | 1 | 0 | 0 | 5 | 9 | 2 | 7 | 3 | 2 | 5 | 8 | 44 | 64 | 68 |    | 4  |     |
|         | 1 | 6 | 6 | 2 |   |   |   |   | 4 |   | 2 | 2 | 0 | 3 | 4 | 9 |    |    |    |    |    |     |
|         | 9 | 2 |   |   |   |   |   |   |   |   | 5 | 6 | 9 | 5 | 4 | 9 |    |    |    |    |    |     |
| AuZn    | 2 | 2 | 1 | 1 | 1 | 1 | 1 | 1 | 2 | 1 | 9 | 9 | 2 |   | - | - | 4. | 0. | 2. | 0. | 4. | 0.1 |
|         | 3 | 0 | 3 | 2 | 1 | 2 | 0 | 0 | 5 | 6 | 2 | 3 | 3 | 0 | 0 | 6 | 19 | 89 | 58 |    | 4  |     |
|         | 3 | 7 | 6 | 2 |   |   |   |   | 4 | 5 | 2 | 9 | 0 |   | 6 | 3 |    |    |    |    |    |     |
|         | 8 | 6 |   |   |   |   |   |   |   |   | 5 | 4 | 9 |   | 2 | 5 |    |    |    |    |    |     |
| AuNb    | 2 | 2 | 1 | 1 | 1 | 5 | 1 | 5 | 2 | 1 | 9 | 6 | 2 | 0 | - | - | 4. | 0. | 3  | 0. | 4. | 0.2 |
|         | 5 | 0 | 3 | 6 | 1 |   | 0 | 5 | 5 | 6 | 2 | 7 | 3 | 8 | 8 | 3 | 14 | 94 | 3  |    | 8  |     |
|         | 1 | 9 | 6 | 4 |   |   |   |   | 4 |   | 2 | 5 | 0 | 9 | 7 | 6 |    |    |    |    |    |     |

|    |   |   |   |   |   |   |   |   |  |   |   |   |   |   |   |    |    |    |    |    |     |
|----|---|---|---|---|---|---|---|---|--|---|---|---|---|---|---|----|----|----|----|----|-----|
|    | 9 | 9 |   |   |   |   |   |   |  | 5 | 8 | 9 | 3 | 0 | 8 |    |    |    |    |    |     |
| A  | 2 | 2 | 1 | 1 |   |   |   |   |  | 2 | 2 | 9 | 7 | 2 | 1 | -  | -  |    |    |    |     |
| u  | . | . | . | . | 1 |   |   |   |  | . | . | . | . | . | . | 5. | 3. |    |    |    |     |
| R  | 4 | 0 | 3 | 4 | 1 | 9 | 1 | 8 |  | 5 | 2 | 2 | 4 | 3 | 1 | 0  | 6  | 4. | 0. | 2. | 0.0 |
| h  | 6 | 2 | 6 | 2 | 1 |   | 0 |   |  | 4 | 8 | 2 | 5 | 0 | 3 | 7  | 4  | 82 | 26 | 78 | 6   |
|    | 4 | 2 |   |   |   |   |   |   |  |   |   | 5 | 9 | 9 | 7 | 5  | 6  |    |    |    |     |
| A  | 2 | 2 | 1 | 1 |   |   |   |   |  | 2 | 2 | 9 | 8 | 2 | 0 | -  | -  |    |    |    |     |
| u  | . | . | . | . | 1 |   |   |   |  | . | . | . | . | . | . | 5. | 3. |    |    |    |     |
| P  | 4 | 0 | 3 | 3 | 1 | 1 | 1 | 1 |  | 5 | 2 | 2 | 3 | 3 | 5 | 2  | 9  | 4. | 0. | 2. | 0.0 |
| d  | 5 | 3 | 6 | 9 | 1 | 0 | 0 | 0 |  | 4 |   | 2 | 3 | 0 | 6 | 4  | 1  | 74 | 34 | 75 | 3   |
|    |   | 3 |   |   |   |   |   |   |  |   |   | 5 | 7 | 9 | 2 | 9  | 7  |    |    |    |     |
| A  | 2 | 2 | 1 | 1 |   |   |   |   |  | 2 | 1 | 9 | 7 | 2 | 1 | -  | -  |    |    |    |     |
| u  | . | . | . | . | 1 | 1 | 1 | 1 |  | . | . | . | . | . | . | 4. | 3. |    |    |    |     |
| A  | 6 | 2 | 3 | 4 | 1 | 1 | 0 | 0 |  | 5 | 9 | 2 | 5 | 3 | 3 | 6  | 7  | 4. | 0. | 2. | 0.0 |
| g  | 0 | 7 | 6 | 5 | 1 | 1 |   |   |  | 4 | 3 | 2 | 7 | 0 | 0 | 2  | 6  | 47 | 61 | 81 | 9   |
|    | 4 | 6 |   |   |   |   |   |   |  |   |   | 5 | 6 | 9 | 2 | 3  | 9  |    |    |    |     |
| A  | 2 | 2 | 1 |   |   |   |   |   |  | 2 | 1 | 9 | 7 | 2 | 0 | -  | -  |    |    |    |     |
| u  | . | . | . | 1 |   |   |   |   |  | . | . | . | . | . | . | 5. | 4. |    |    |    |     |
| T  | 5 | 0 | 3 | . | 1 | 5 | 1 | 3 |  | 5 | 5 | 2 | 8 | 3 | 3 | 5  | 0  | 4. | 1. | 3. | 0.3 |
| a  | 1 | 8 | 6 | 7 | 1 |   | 0 |   |  | 4 |   | 2 | 8 | 0 | 2 | 8  | 3  | 04 | 04 | 06 | 4   |
|    | 2 | 6 |   |   |   |   |   |   |  |   |   | 5 | 7 | 9 | 2 | 2  | 1  |    |    |    |     |
| A  | 2 | 2 | 1 | 1 |   |   |   |   |  | 2 | 2 | 9 | 9 | 2 | 1 | -  | -  |    |    |    |     |
| u  | . | . | . | . | 1 |   |   |   |  | . | . | . | . | . | . | 4. | 1. |    |    |    |     |
| Ir | 4 | 0 | 3 | 4 | 1 | 9 | 1 | 7 |  | 5 | 2 | 2 | 1 | 3 | 5 | 7  | 9  | 4. | 0. | 2. | 0.0 |
|    | 8 | 1 | 6 | 1 |   |   | 0 |   |  | 4 |   | 2 | 2 | 0 | 6 | 3  | 6  | 74 | 34 | 77 | 5   |
|    | 3 | 5 |   |   |   |   |   |   |  |   |   | 5 | 1 | 9 | 5 | 8  | 8  |    |    |    |     |
| A  | 2 | 2 | 1 | 1 |   |   |   |   |  | 2 | 2 | 9 | 9 | 2 | 2 | -  | -  |    |    |    |     |
| u  | . | . | . | . | 1 |   |   |   |  | . | . | . | . | . | . | 5. | 3. |    |    |    |     |
| P  | 4 | 0 | 3 | 3 | 1 | 1 | 1 | 9 |  | 5 | 2 | 2 | 0 | 3 | 1 | 2  | 6  | 4. | 0. | 2. | 0   |
| t  | 7 | 2 | 6 | 6 | 1 | 0 | 0 |   |  | 4 | 8 | 2 | 1 | 0 | 2 | 3  | 7  | 82 | 26 | 72 |     |
|    | 5 | 6 |   |   |   |   |   |   |  |   |   | 5 | 7 | 9 | 8 | 9  | 2  |    |    |    |     |

**Table S12.** The calculated coefficient of determination ( $R^2$ ) and the root-mean-square-error (RMSE) values for training samples and testing samples.

| DFT calculated<br>vs predicted<br>values | Training samples |       | Testing samples |       |
|------------------------------------------|------------------|-------|-----------------|-------|
|                                          | $R^2$            | RMSE  | $R^2$           | RMSE  |
| $\Delta G_{H^*}$ (eV)                    | 0.978            | 0.333 | 0.965           | 0.012 |
| $\eta^{OER}$ (V)                         | 0.987            | 0.243 | 0.982           | 0.007 |
| $\eta^{ORR}$ (V)                         | 0.982            | 0.245 | 0.977           | 0.012 |

**Table S13.** The calculated  $\Delta G_{H^*}$ ,  $\eta^{OER}$  and  $\eta^{ORR}$  values for Ni<sub>2</sub>/g-CN, Pd<sub>2</sub>/g-CN, CuPd/g-CN, PdNi/g-CN, AgPt/g-CN, AuFe/g-CN, AuCo/g-CN, AuNi/g-CN, AuRh/g-CN, AgPd/g-CN, AuPd/g-CN, and AuIr/g-CN after considering solvation correction via VaspSol.

| Systems               | $\Delta G_{H^*}$ |       | $\eta^{OER}$ |      | $\eta^{ORR}$ |      |
|-----------------------|------------------|-------|--------------|------|--------------|------|
|                       | vaspsol          | vasp  | vaspsol      | vasp | vaspsol      | vasp |
| Ni <sub>2</sub> /g-CN | -0.07            | -0.05 | -            | -    | -            | -    |
| Pd <sub>2</sub> /g-CN | -0.01            | 0.03  | -            | -    | -            | -    |
| CuPd/g-CN             | -0.03            | -0.02 | -            | -    | 0.56         | 0.47 |
| PdNi/g-CN             | -0.03            | 0     | -            | -    | -            | -    |
| AgPt/g-CN             | 0.05             | 0     | -            | -    | -            | -    |

|           |       |       |      |      |      |      |
|-----------|-------|-------|------|------|------|------|
| AuFe/g-CN | 0.11  | 0.02  | -    | -    | -    | -    |
| AuCo/g-CN | 0.02  | 0.05  | 0.44 | 0.52 | 0.62 | 0.48 |
| AuNi/g-CN | 0.11  | 0.08  | -    | -    | -    | -    |
| AuRh/g-CN | -0.11 | -0.09 | -    | -    | 0.47 | 0.35 |
| AgPd/g-CN | -     | -     | 0.46 | 0.43 | 0.67 | 0.48 |
| AuPd/g-CN | -     | -     | 0.39 | 0.48 | -    | -    |
| AuIr/g-CN | -     | -     | -    | -    | 0.57 | 0.44 |

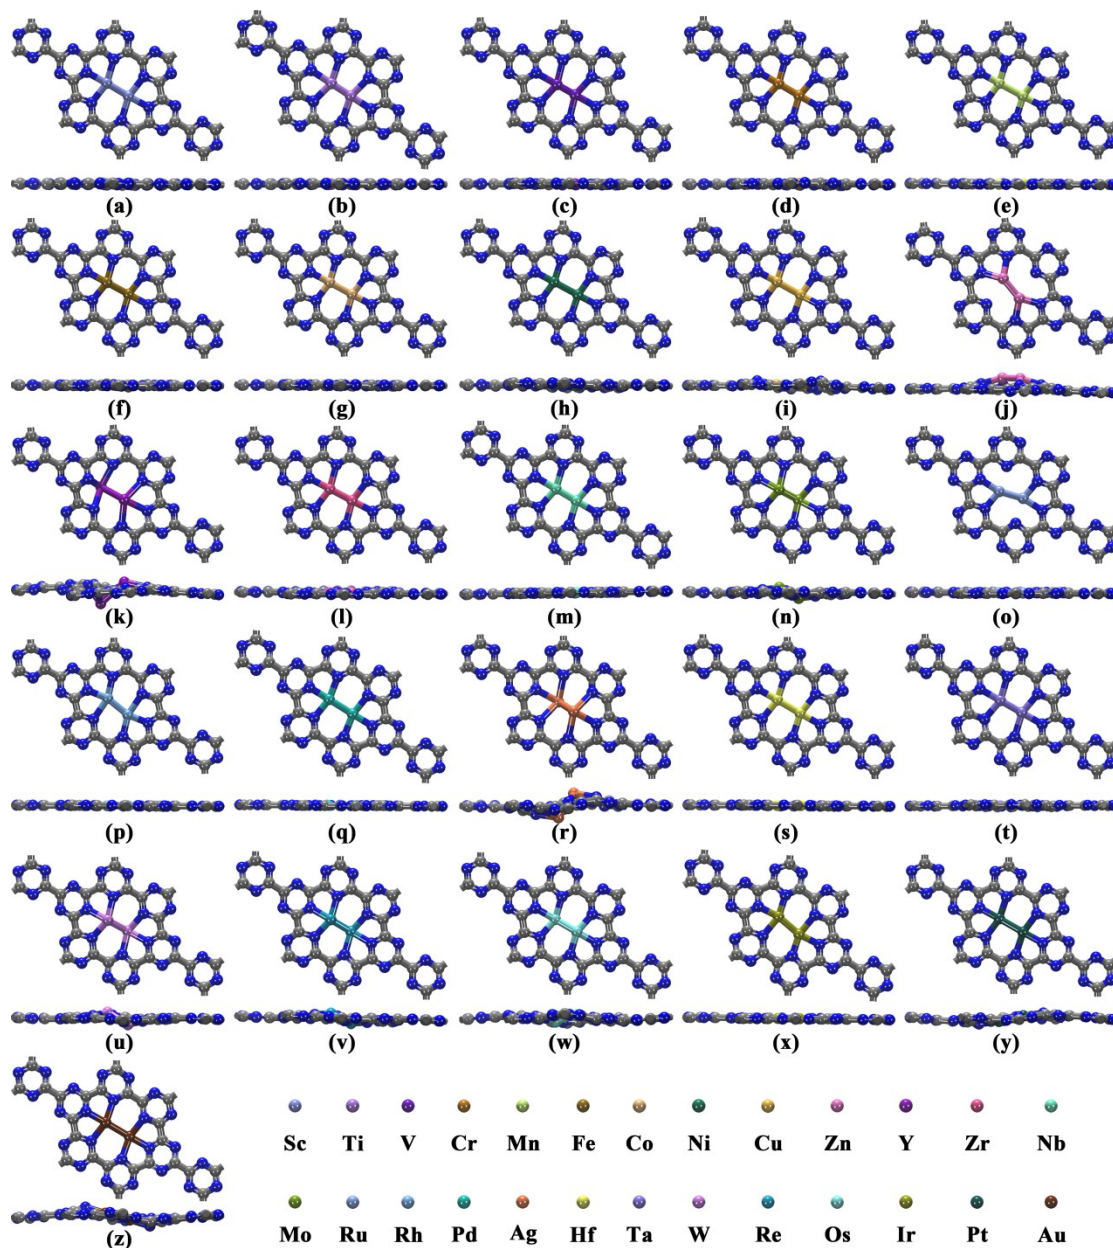

**Fig. S1.** The stable configurations for (a)  $\text{Sc}_2/\text{g-CN}$ , (b)  $\text{Ti}_2/\text{g-CN}$ , (c)  $\text{V}_2/\text{g-CN}$ , (d)

Cr<sub>2</sub>/g-CN, (e) Mn<sub>2</sub>/g-CN, (f) Fe<sub>2</sub>/g-CN, (g) Co<sub>2</sub>/g-CN, (h) Ni<sub>2</sub>/g-CN, (i) Cu<sub>2</sub>/g-CN, (j) Zn<sub>2</sub>/g-CN, (k) Y<sub>2</sub>/g-CN, (l) Zr<sub>2</sub>/g-CN, (m) Nb<sub>2</sub>/g-CN, (n) Mo<sub>2</sub>/g-CN, (o) Ru<sub>2</sub>/g-CN, (p) Rh<sub>2</sub>/g-CN, (q) Pd<sub>2</sub>/g-CN, (r) Ag<sub>2</sub>/g-CN, (s) Hf<sub>2</sub>/g-CN, (t) Ta<sub>2</sub>/g-CN, (u) W<sub>2</sub>/g-CN, (v) Re<sub>2</sub>/g-CN, (w) Os<sub>2</sub>/g-CN, (x) Ir<sub>2</sub>/g-CN, (y) Pt<sub>2</sub>/g-CN, and (z) Au<sub>2</sub>/g-CN.

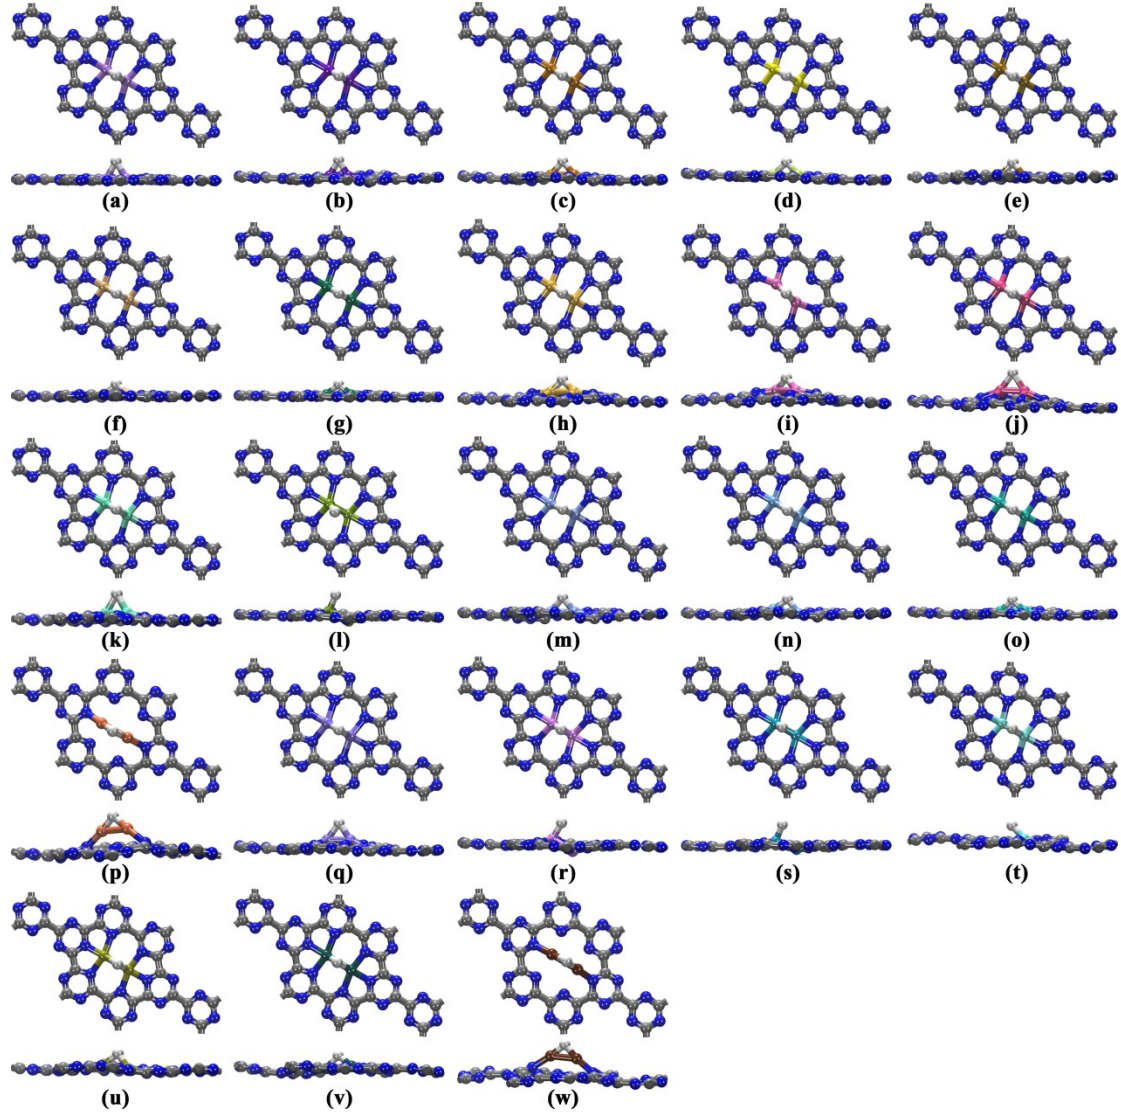

**Fig. S2.** The stable configurations for H adsorption on (a) Ti<sub>2</sub>/g-CN, (b) V<sub>2</sub>/g-CN, (c) Cr<sub>2</sub>/g-CN, (d) Mn<sub>2</sub>/g-CN, (e) Fe<sub>2</sub>/g-CN, (f) Co<sub>2</sub>/g-CN, (g) Ni<sub>2</sub>/g-CN, (h) Cu<sub>2</sub>/g-CN, (i) Zn<sub>2</sub>/g-CN, (j) Zr<sub>2</sub>/g-CN, (k) Nb<sub>2</sub>/g-CN, (l) Mo<sub>2</sub>/g-CN, (m) Ru<sub>2</sub>/g-CN, (n) Rh<sub>2</sub>/g-CN, (o) Pd<sub>2</sub>/g-CN, (p) Ag<sub>2</sub>/g-CN, (q) Ta<sub>2</sub>/g-CN, (r) W<sub>2</sub>/g-CN, (s) Re<sub>2</sub>/g-CN, (t) Os<sub>2</sub>/g-CN, (u) Ir<sub>2</sub>/g-CN, (v) Pt<sub>2</sub>/g-CN, and (w) Au<sub>2</sub>/g-CN.



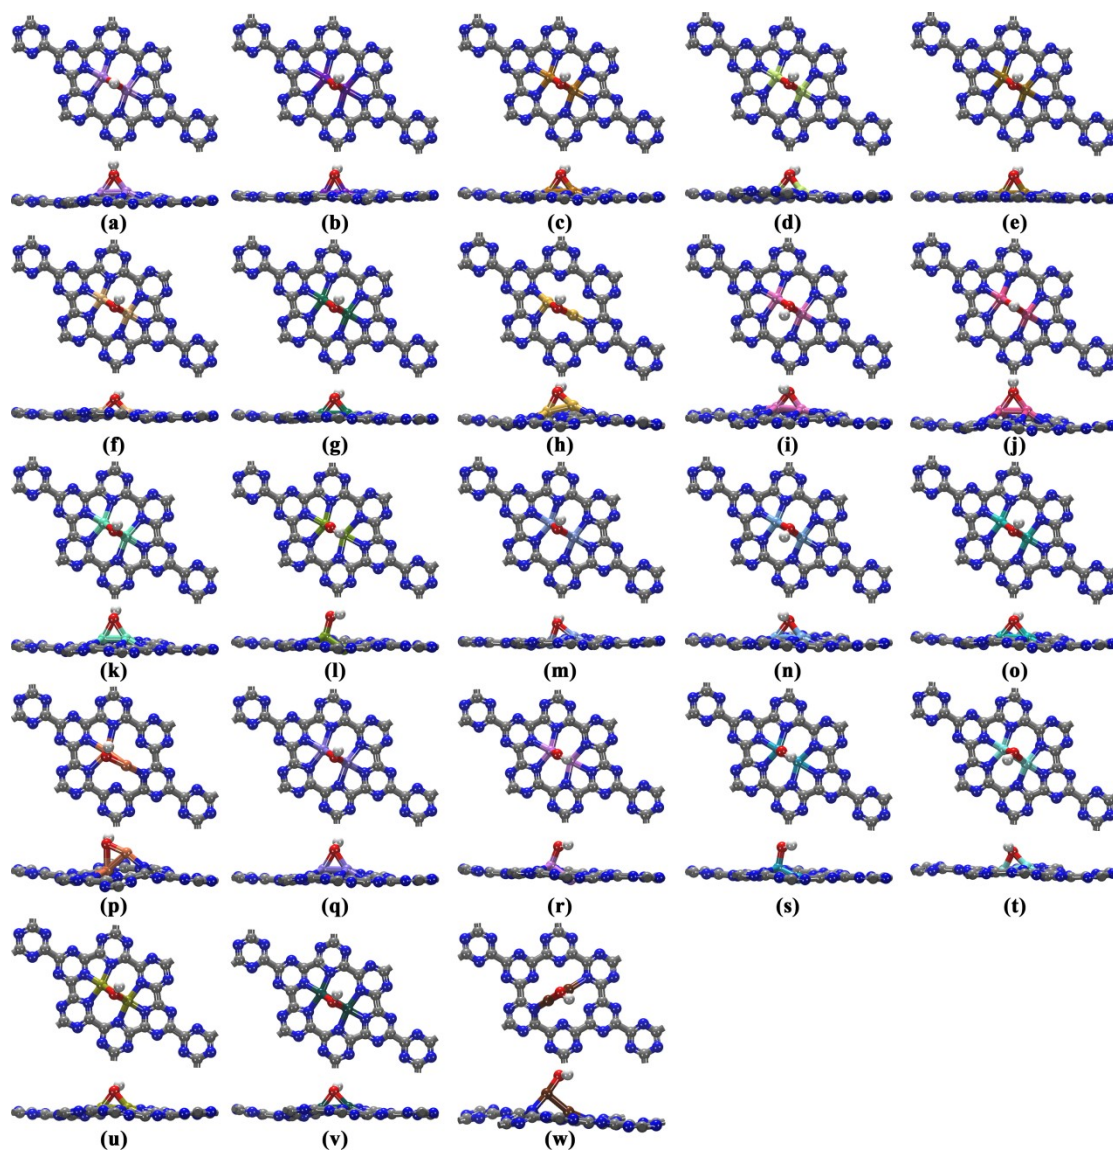

**Fig. S3.** The stable configurations for OH adsorption on (a)  $\text{Ti}_2/\text{g-CN}$ , (b)  $\text{V}_2/\text{g-CN}$ , (c)  $\text{Cr}_2/\text{g-CN}$ , (d)  $\text{Mn}_2/\text{g-CN}$ , (e)  $\text{Fe}_2/\text{g-CN}$ , (f)  $\text{Co}_2/\text{g-CN}$ , (g)  $\text{Ni}_2/\text{g-CN}$ , (h)  $\text{Cu}_2/\text{g-CN}$ , (i)  $\text{Zn}_2/\text{g-CN}$ , (j)  $\text{Zr}_2/\text{g-CN}$ , (k)  $\text{Nb}_2/\text{g-CN}$ , (l)  $\text{Mo}_2/\text{g-CN}$ , (m)  $\text{Ru}_2/\text{g-CN}$ , (n)  $\text{Rh}_2/\text{g-CN}$ , (o)  $\text{Pd}_2/\text{g-CN}$ , (p)  $\text{Ag}_2/\text{g-CN}$ , (q)  $\text{Ta}_2/\text{g-CN}$ , (r)  $\text{W}_2/\text{g-CN}$ , (s)  $\text{Re}_2/\text{g-CN}$ , (t)  $\text{Os}_2/\text{g-CN}$ , (u)  $\text{Ir}_2/\text{g-CN}$ , (v)  $\text{Pt}_2/\text{g-CN}$ , and (w)  $\text{Au}_2/\text{g-CN}$ .

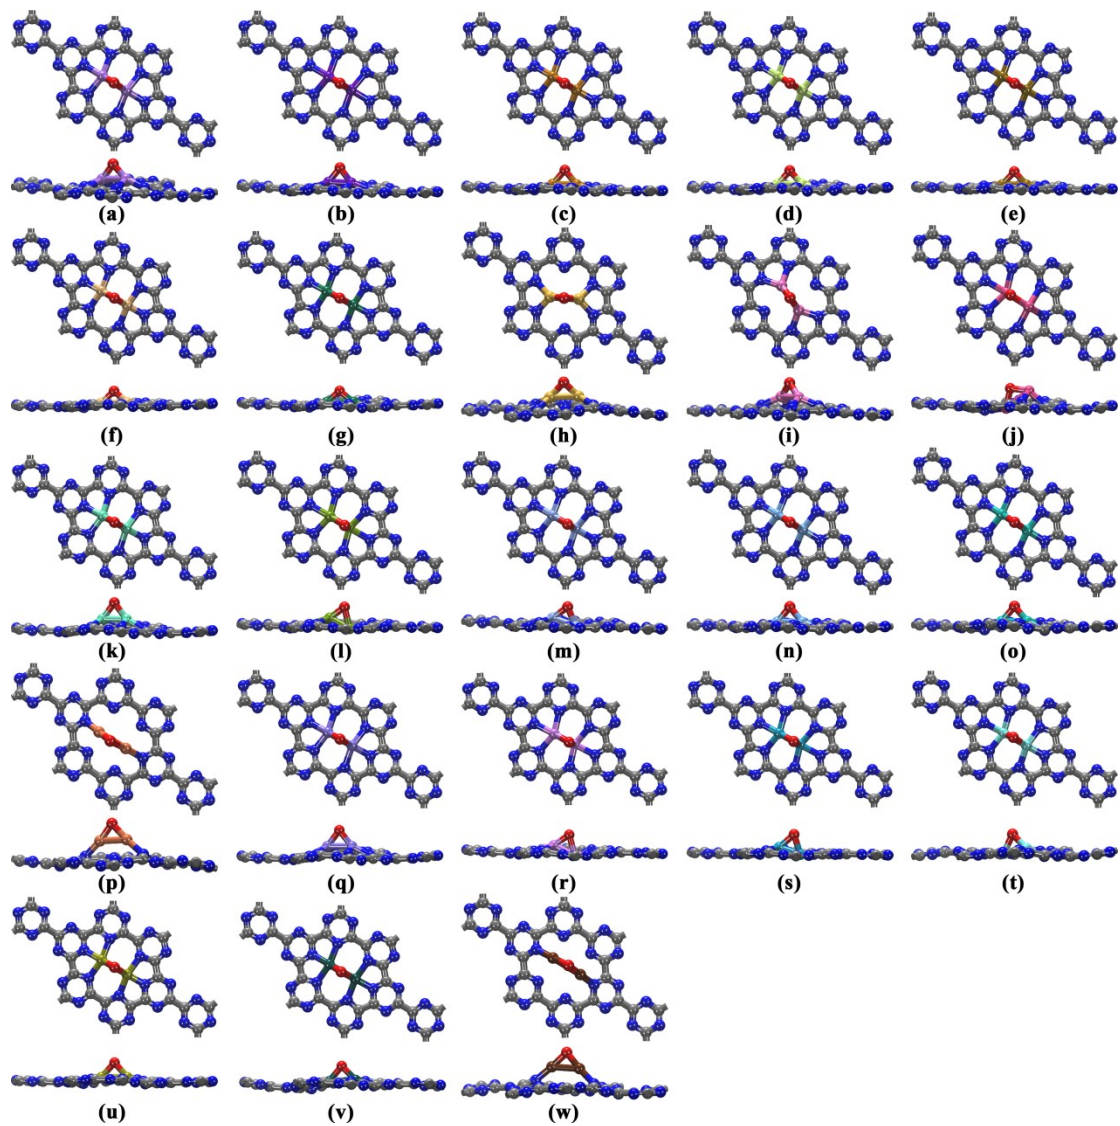

**Fig. S4.** The stable configurations for O adsorption on (a)  $\text{Ti}_2/\text{g-CN}$ , (b)  $\text{V}_2/\text{g-CN}$ , (c)  $\text{Cr}_2/\text{g-CN}$ , (d)  $\text{Mn}_2/\text{g-CN}$ , (e)  $\text{Fe}_2/\text{g-CN}$ , (f)  $\text{Co}_2/\text{g-CN}$ , (g)  $\text{Ni}_2/\text{g-CN}$ , (h)  $\text{Cu}_2/\text{g-CN}$ , (i)  $\text{Zn}_2/\text{g-CN}$ , (j)  $\text{Zr}_2/\text{g-CN}$ , (k)  $\text{Nb}_2/\text{g-CN}$ , (l)  $\text{Mo}_2/\text{g-CN}$ , (m)  $\text{Ru}_2/\text{g-CN}$ , (n)  $\text{Rh}_2/\text{g-CN}$ , (o)  $\text{Pd}_2/\text{g-CN}$ , (p)  $\text{Ag}_2/\text{g-CN}$ , (q)  $\text{Ta}_2/\text{g-CN}$ , (r)  $\text{W}_2/\text{g-CN}$ , (s)  $\text{Re}_2/\text{g-CN}$ , (t)  $\text{Os}_2/\text{g-CN}$ , (u)  $\text{Ir}_2/\text{g-CN}$ , (v)  $\text{Pt}_2/\text{g-CN}$ , and (w)  $\text{Au}_2/\text{g-CN}$ .

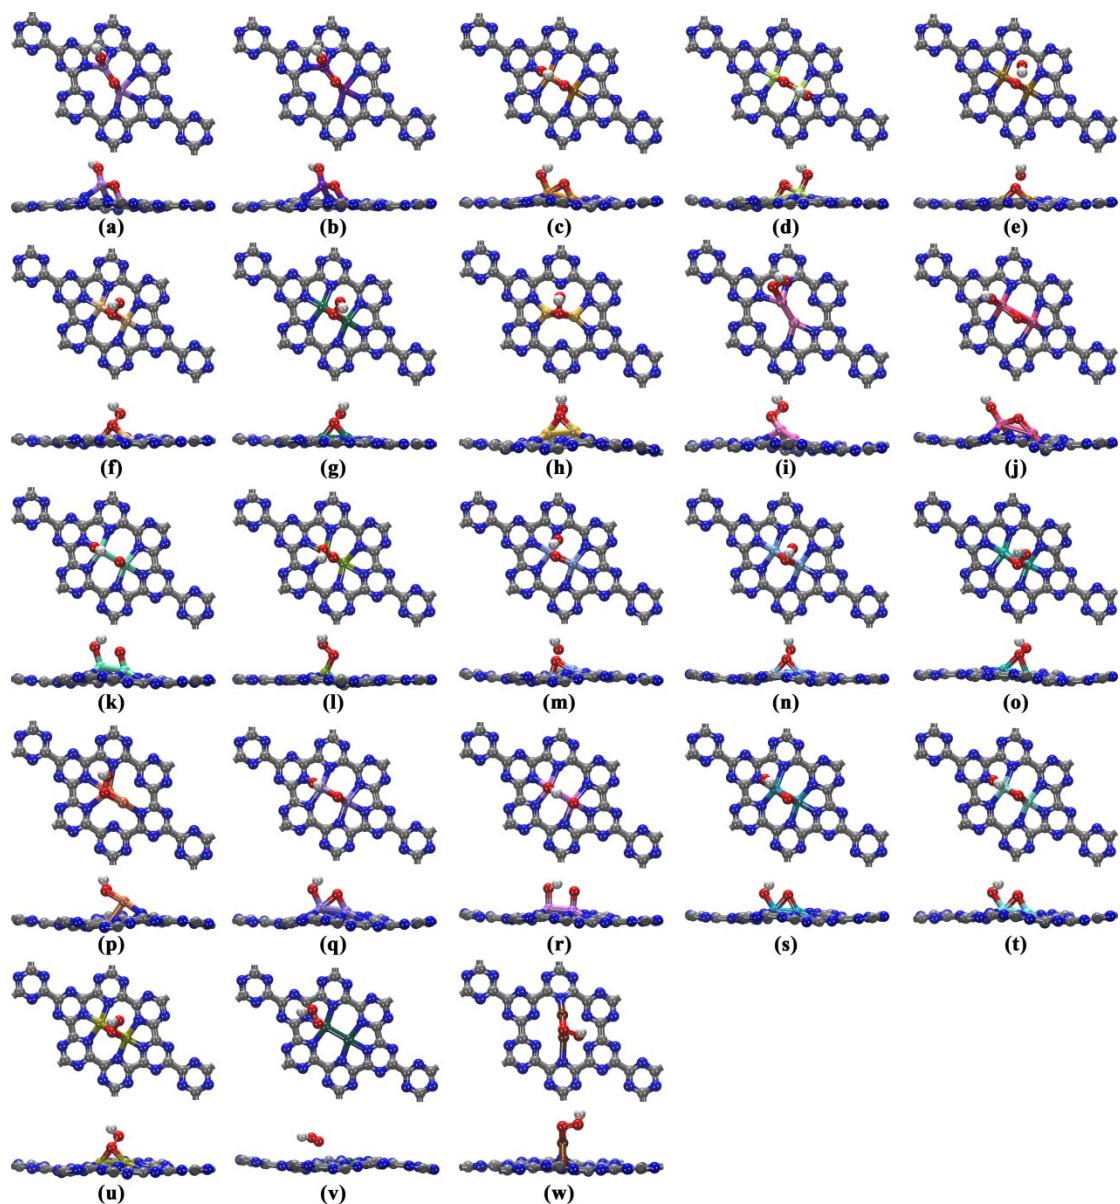

**Fig. S5.** The stable configurations for OOH adsorption on (a)  $\text{Ti}_2/\text{g-CN}$ , (b)  $\text{V}_2/\text{g-CN}$ , (c)  $\text{Cr}_2/\text{g-CN}$ , (d)  $\text{Mn}_2/\text{g-CN}$ , (e)  $\text{Fe}_2/\text{g-CN}$ , (f)  $\text{Co}_2/\text{g-CN}$ , (g)  $\text{Ni}_2/\text{g-CN}$ , (h)  $\text{Cu}_2/\text{g-CN}$ , (i)  $\text{Zn}_2/\text{g-CN}$ , (j)  $\text{Zr}_2/\text{g-CN}$ , (k)  $\text{Nb}_2/\text{g-CN}$ , (l)  $\text{Mo}_2/\text{g-CN}$ , (m)  $\text{Ru}_2/\text{g-CN}$ , (n)  $\text{Rh}_2/\text{g-CN}$ , (o)  $\text{Pd}_2/\text{g-CN}$ , (p)  $\text{Ag}_2/\text{g-CN}$ , (q)  $\text{Ta}_2/\text{g-CN}$ , (r)  $\text{W}_2/\text{g-CN}$ , (s)  $\text{Re}_2/\text{g-CN}$ , (t)  $\text{Os}_2/\text{g-CN}$ , (u)  $\text{Ir}_2/\text{g-CN}$ , (v)  $\text{Pt}_2/\text{g-CN}$ , (w)  $\text{Au}_2/\text{g-CN}$ .

(u) Ir<sub>2</sub>/g-CN, (v) Pt<sub>2</sub>/g-CN, and (w) Au<sub>2</sub>/g-CN.

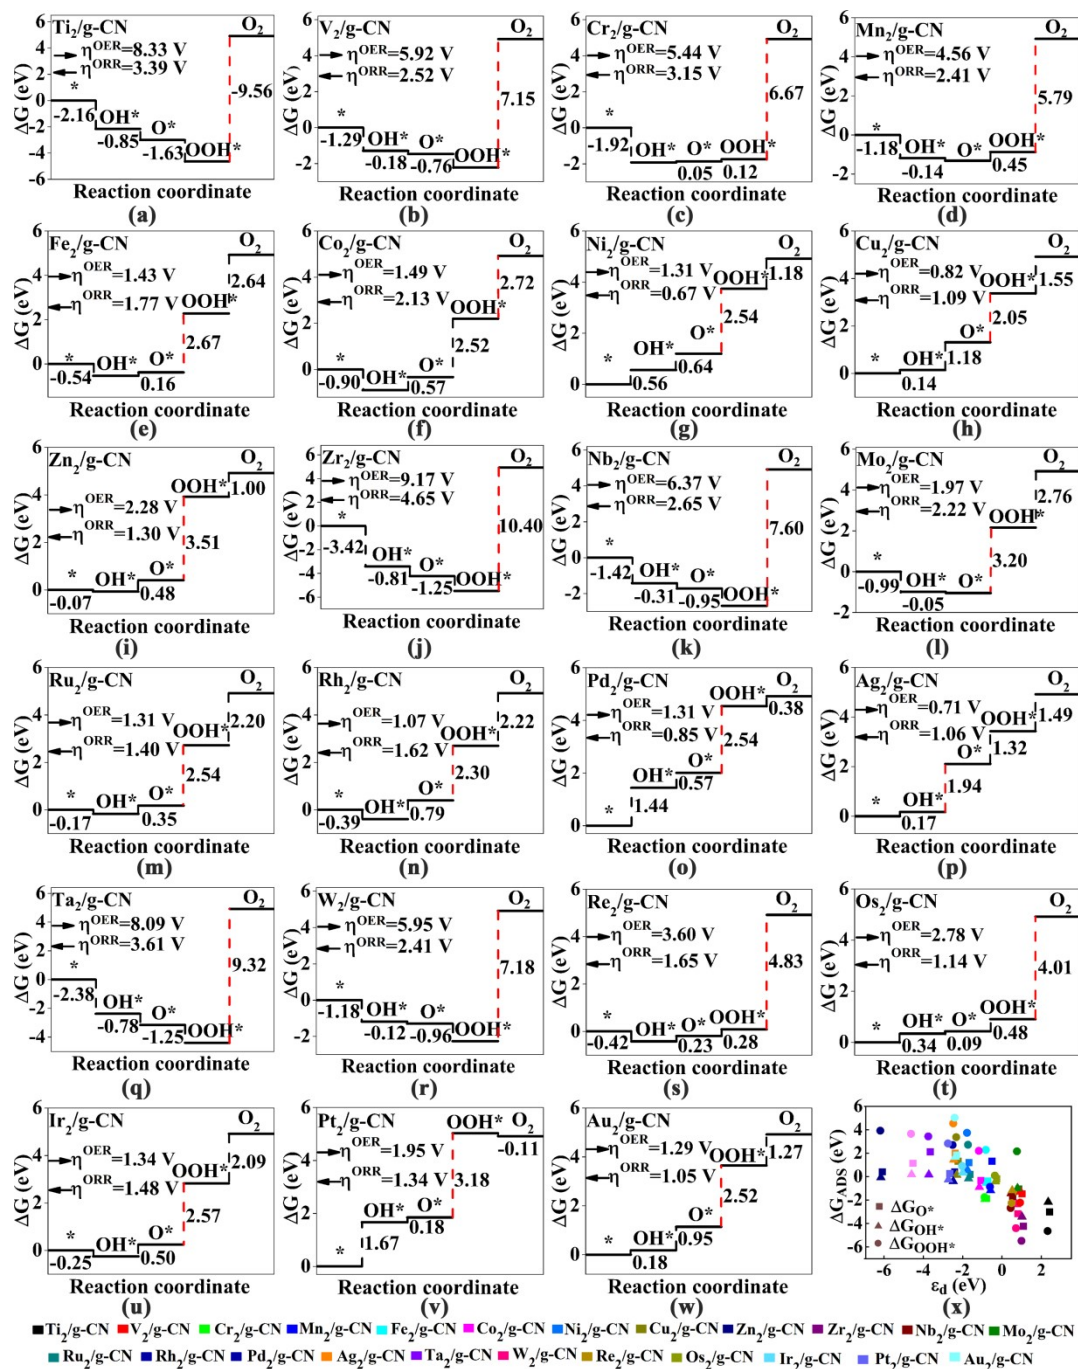

**Fig. S6.** (a)-(w) The Gibbs free energy for O/OH/OOH adsorption on  $M_2/g-CN$  ( $M =$  Ti, V, Cr, Mn, Fe, Co, Ni, Cu, Zn, Zr, Nb, Mo, Ru, Rh, Pd, Ag, Ta, W, Re, Os, Ir, Pt,

Au). (x) The relations between the d band center ( $\epsilon_d$ ) and  $\Delta G_{O^*}/\Delta G_{OH^*}/\Delta G_{OOH^*}$ .

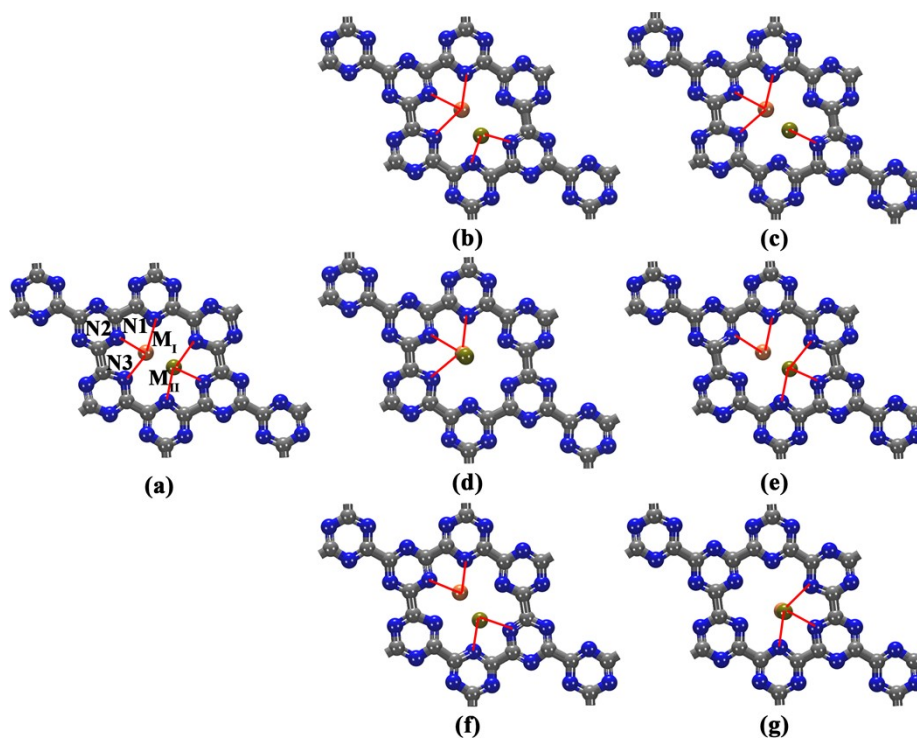

**Fig. S7.** The stable configurations for (a)  $M_I M_{II}/g\text{-CN}$  ( $M_I = \text{Ti, V, Cr, Mn, Fe, Co, Ni, Cu, Zn, Zr, Nb, Mo, Ru, Rh, Pd, Ag, Ta, W, Re, Os, Ir, Pt, Au}$ ;  $M_{II} = \text{V, Cr, Mn, Fe, Co, Ni, Cu, Zn, Zr, Nb, Mo, Ru, Rh, Pd, Ag, Ta, W, Re, Os, Ir, Pt, Au}$ ;  $M_I \neq M_{II}$ ;  $M_I M_{II} \neq \text{ZrCu, NbCu, TaCu, RuZn, TaZn, ZnTi, NbZn, MoAg, ReAg, AgTi, ZrZn, ZrAg, AgNb, TaAg, WAg, MoZn, WZn, ReZn, OsZn}$ ), (b)  $M_I M_{II}/g\text{-CN}$  ( $M_I M_{II} = \text{ZrCu, NbCu, RuZn, TaCu, TaZn}$ ), (c)  $M_I M_{II}/g\text{-CN}$  ( $M_I M_{II} = \text{NbZn, MoAg, ReAg}$ ), (d)  $M_I M_{II}/g\text{-CN}$  ( $M_I M_{II} = \text{ZrZn, ZrAg, TaAg, WAg}$ ), (e)  $M_I M_{II}/g\text{-CN}$  ( $M_I M_{II} = \text{ZnTi, AgV}$ ), (f)  $M_I M_{II}/g\text{-CN}$  ( $M_I M_{II} = \text{MoZn, WZn, ReZn, OsZn}$ ), and (g)  $M_I M_{II}/g\text{-CN}$  ( $M_I M_{II} = \text{AgTi, AgNb}$ ).

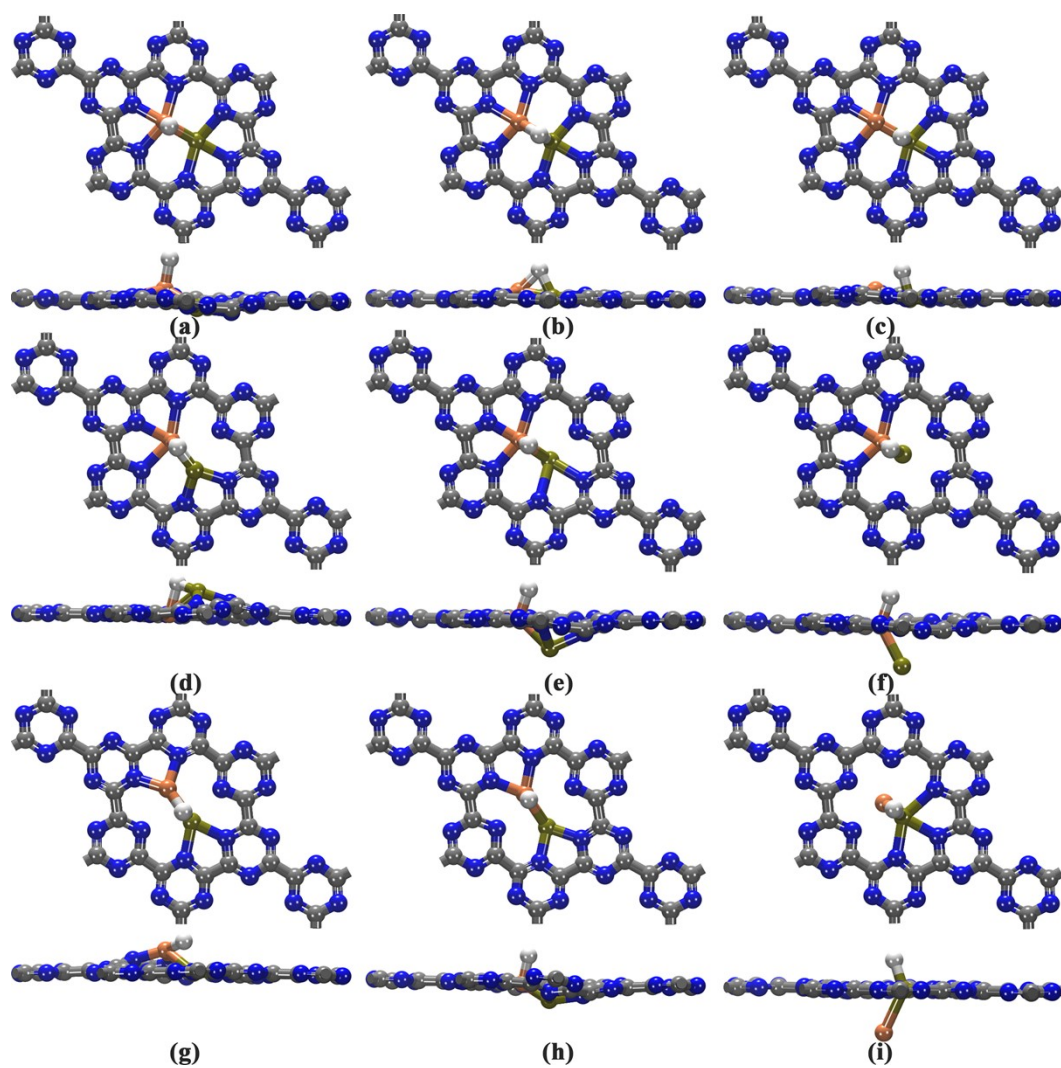

**Fig. S8.** The stable configurations for H adsorption on (a)  $M_I M_{II}/g\text{-CN}$  ( $M_I M_{II} = \text{TiPd}$ ,  $\text{VPd}$ ,  $\text{CrZr}$ ,  $\text{ZnV}$ ,  $\text{ZrNi}$ ,  $\text{ZrPd}$ ,  $\text{ZrAu}$ ,  $\text{NbTi}$ ,  $\text{NbNi}$ ,  $\text{NbRh}$ ,  $\text{NbPd}$ ,  $\text{MoTi}$ ,  $\text{MoMn}$ ,  $\text{MoZr}$ ,  $\text{MoRh}$ ,  $\text{MoPd}$ ,  $\text{MoIr}$ ,  $\text{MoAu}$ ,  $\text{RuTi}$ ,  $\text{RuV}$ ,  $\text{RuCu}$ ,  $\text{RuZr}$ ,  $\text{RuNb}$ ,  $\text{RuAg}$ ,  $\text{RuTa}$ ,  $\text{RuAu}$ ,  $\text{RhV}$ ,  $\text{TaTi}$ ,  $\text{TaNi}$ ,  $\text{Ta Nb}$ ,  $\text{TaRh}$ ,  $\text{TaPd}$ ,  $\text{WTi}$ ,  $\text{WFe}$ ,  $\text{WNi}$ ,  $\text{WZr}$ ,  $\text{WRu}$ ,  $\text{WPd}$ ,  $\text{WIr}$ ,  $\text{W Pt}$ ,  $\text{WAu}$ ,  $\text{ReTi}$ ,  $\text{ReV}$ ,  $\text{ReMn}$ ,  $\text{ReFe}$ ,  $\text{ReNi}$ ,  $\text{ReCu}$ ,  $\text{ReNb}$ ,  $\text{ReRh}$ ,  $\text{RePd}$ ,  $\text{ReTa}$ ,  $\text{ReOs}$ ,  $\text{ReAu}$ ,  $\text{OsTi}$ ,  $\text{OsV}$ ,  $\text{OsMn}$ ,  $\text{OsRu}$ ,  $\text{OsPd}$ ,  $\text{OsAg}$ ,  $\text{OsTa}$ ,  $\text{OsAu}$ ,  $\text{IrTi}$ ,  $\text{IrV}$ ,  $\text{IrNb}$ ,  $\text{IrAg}$ ,  $\text{IrTa}$ ,  $\text{AuV}$ ,

AuMn, AuNi, AuZn, AuPd, AuAg), (b)  $M_I M_{II}/g\text{-CN}$  ( $M_I M_{II} = \text{TiFe, TiCo, TiNi, TiCu, TiPt, VTi, VFe, VCo, VNi, VCu, VPt, CrTi, CrV, CrMn, CrFe, CrCo, CrNi, CrCu, CrZn, CrNb, CrMo, CrRu, CrRh, CrPd, CrAg, CrTa, CrW, CrIr, CrPt, MnTi, MnV, MnFe, MnCo, MnNi, MnCu, MnPd, MnPt, FeCo, FeNi, FeCu, FePd, FePt, CoNi, CuCo, CuNi, CuPd, CuPt, ZnMn, ZnTi, ZnCo, ZnNi, ZnCu, ZnPd, ZnPt, ZrTi, ZrV, ZrMn, ZrFe, ZrCo, ZrPt, NbV, NbMn, NbFe, NbCo, NbPt, MoV, MoFe, MoCo, MoNi, MoCu, MoNb, MoTa, MoPt, RuMn, RuFe, RuCo, RuNi, RuRh, RuPd, RuIr, RuPt, RhTi, RhMn, RhFe, RhCo, RhNi, RHCu, RhZn, RhPd, RhPt, PdCo, PdNi, PdPt, AgMn, AgFe, AgCo, AgNi, AgCu, AgZn, AgRh, AgPd, AgPt, TaV, TaMn, TaFe, TaCo, TaPt, WV, WMn, WCo, WCu, WRh, ReCo, ReZr, ReRu, ReIr, RePt, OsFe, OsCo, OsNi, OsCu, OsZr, OsNb, OsRh, OsIr, OsPt, IrMn, IrFe, IrCo, IrNi, IrCu, IrZn, IrRh, IrPd, IrPt, PtCo, PtNi, AuPt)$ ), (c)  $M_I M_{II}/g\text{-CN}$  ( $M_I M_{II} = \text{CrRe, CrOs, CrAu, ZrNb, ZrRh, ZrTa, ZrIr, MoRu, MoW, MoRe, MoOs, AgNb, WNb, WTa, WRe, WOs, AuTi, AuFe, AuNb, AuTa, AuIr}$ ), (d)  $M_I M_{II}/g\text{-CN}$  ( $M_I M_{II} = \text{ZrCu, NbCu, RuZn, TaCu, TaZn}$ ), (e)  $M_I M_{II}/g\text{-CN}$  ( $M_I M_{II} = \text{NbZn, MoAg, ReAg}$ ), (f)  $M_I M_{II}/g\text{-CN}$  ( $M_I M_{II} = \text{ZrZn, ZrAg, TaAg, WAg}$ ), (g)  $M_I M_{II}/g\text{-CN}$  ( $M_I M_{II} = \text{ZnTi, AgV}$ ), (h)  $M_I M_{II}/g\text{-CN}$  ( $M_I M_{II} = \text{MoZn, WZn, ReZn, OsZn}$ ), and (i)  $M_I M_{II}/g\text{-CN}$  ( $M_I M_{II} = \text{AgTi, AgNb}$ ).

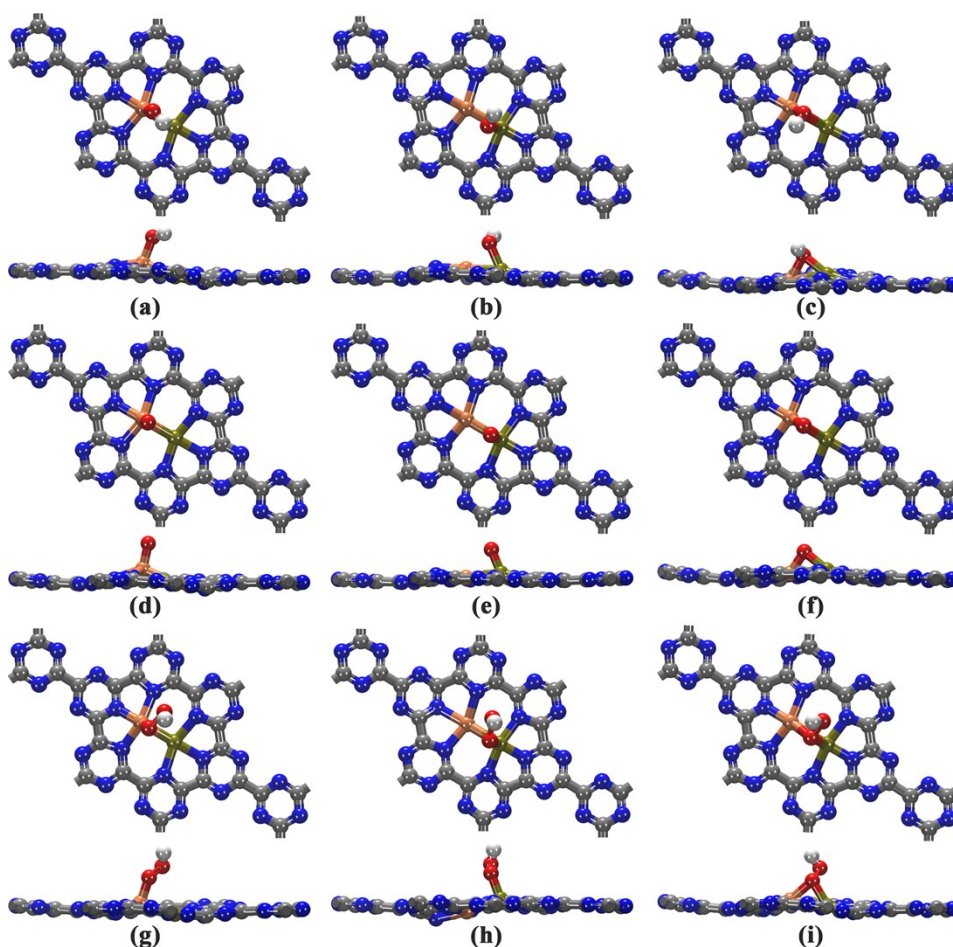

**Fig. S9.** The stable configurations for OH adsorption on (a)  $M_I M_{II}/g\text{-CN}$  ( $M_I M_{II} = \text{FePd, RuAu, IrAg}$ ), (b)  $M_I M_{II}/g\text{-CN}$  ( $M_I M_{II} = \text{AgCo, AgNi, AgRh, AgPd, AuFe, AuCo, AuNi, AuZn, AuRh, AuPd, AuIr, AuPt}$ ), and (c)  $M_I M_{II}/g\text{-CN}$  ( $M_I M_{II} = \text{FePt, CuNi, CuPd, CuPt, ZnNi, ZnPd, ZnPt, MoPt, RuPt, RhCu, RhPd, RhPt, PdCo, PdNi, PdPt, AgCu, AgPt, ReIr, IrCu, IrPd, IrPt, PtCo, PtNi, AuCu}$ ). The stable configurations for O adsorption on (d)  $M_I M_{II}/g\text{-CN}$  ( $M_I M_{II} = \text{MoPt, ReIr, IrAg}$ ), (e)  $\text{AuFe}/g\text{-CN}$ , and (f)  $M_I M_{II}/g\text{-CN}$  ( $M_I M_{II} = \text{FePd, FePt, CuNi, CuPd, CuPt, ZnNi, ZnPd, ZnPt, RuPt, RuAu, RhCu, RhPd, RhPt, PdCo, PdNi, PdPt, AgCo, AgNi, AgCu, AgRh, AgPd, AgPt, IrCu, IrPd, IrPt, PtCo, PtNi, AuFe, AuCo, AuNi, AuCu, AuZn, AuRh, AuPd, AuIr, AuPt}$ ). The stable configurations for OOH adsorption on (g)  $M_I M_{II}/g\text{-CN}$  ( $M_I M_{II} = \text{FePd, CuPd, MoPt, RuAu, RhPd, AgPt, IrPd, IrAg, AuPd, AuPt}$ ), (h)  $M_I M_{II}/g\text{-CN}$  ( $M_I M_{II} = \text{PdPt, AgCo, AgNi, AgCu, AgRh, AgPd, AuFe, AuCo, AuNi, AuCu, AuZn, AuRh, AuIr}$ ), and (i) ( $\text{FePt, CuNi, CuPt, ZnNi, ZnPd, ZnPt, RuPt, RhCu, RhPt, PdCo, PdNi, ReIr, IrCu, IrPt, PtCo, PtNi}$ ).



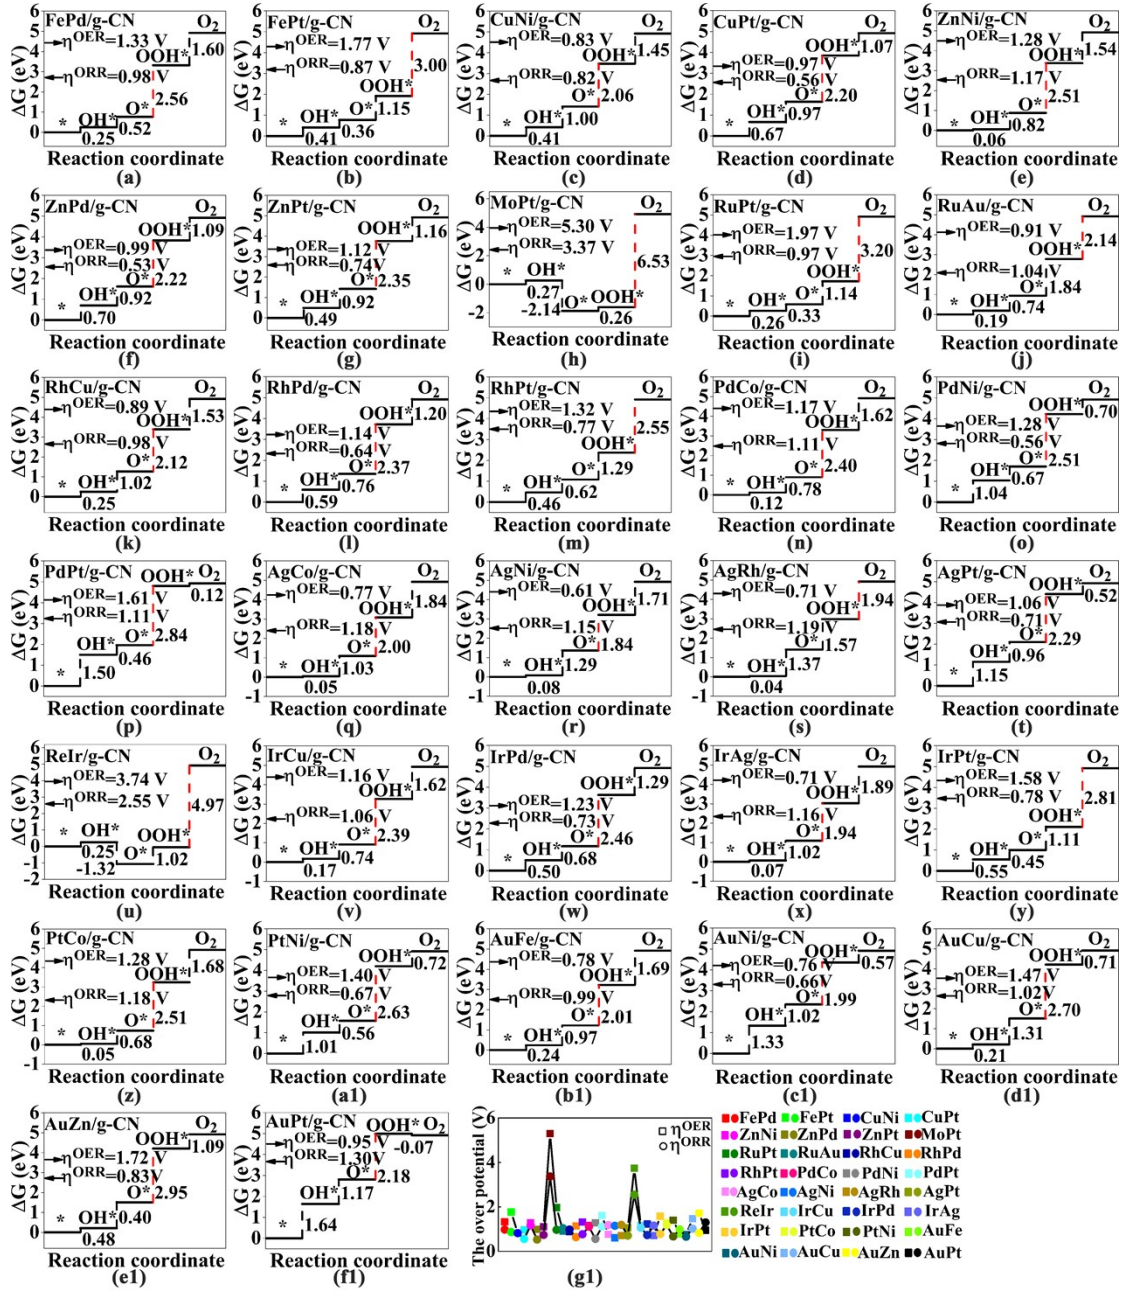

**Fig. S10.** Calculated free energy diagram of OER/ORR on (a) FePd/g-CN, (b) FePt/g-CN, (c) CuNi/g-CN, (d) CuPt/g-CN, (e) ZnNi/g-CN, (f) ZnPd/g-CN, (g) ZnPt/g-CN, (h) MoPt/g-CN, (i) RuPt/g-CN, (j) RuAu/g-CN, (k) RhCu/g-CN, (l) RhPd/g-CN, (m) RhPt/g-CN, (n) PdCo/g-CN, (o) PdNi/g-CN, (p) PdPt/g-CN, (q) AgCo/g-CN, (r) AgNi/g-CN, (s) AgRh/g-CN, (t) AgPt/g-CN, (u) ReIr/g-CN, (v) IrCu/g-CN, (w) IrPd/g-CN, (x) IrAg/g-CN, (y) IrPt/g-CN, (z) PtCo/g-CN, (a1) PtNi/g-CN, (b1) AuFe/g-CN, (c1) AuNi/g-CN, (d1) AuCu/g-CN, (e1) AuZn/g-CN, and (f1) AuPt/g-CN under  $U=0$  V, wherein the PDS of the elementary reactions are denoted as red lines. (g1) The overpotentials of OER/ORR for  $M_I M_{II}/g\text{-CN}$  ( $M_I M_{II} = \text{FePd}, \text{FePt},$

CuNi, CuPt, ZnNi, ZnPd, ZnPt, MoPt, RuPt, RuAu, RhCu, RhPd, RhPt, PdCo, PdNi, PdPt, AgCo, AgNi, AgRh, AgPt, ReIr, IrCu, IrPd, IrAg, IrPt, PtCo, PtNi, AuFe, AuNi, AuCu, AuZn, AuPt).

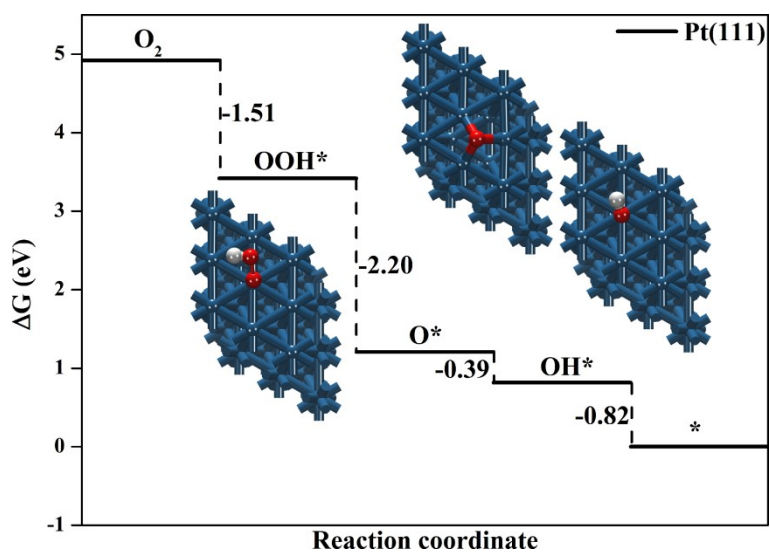

**Fig. S11.** Calculated free energy diagram of ORR on the benchmark catalyst Pt(111).

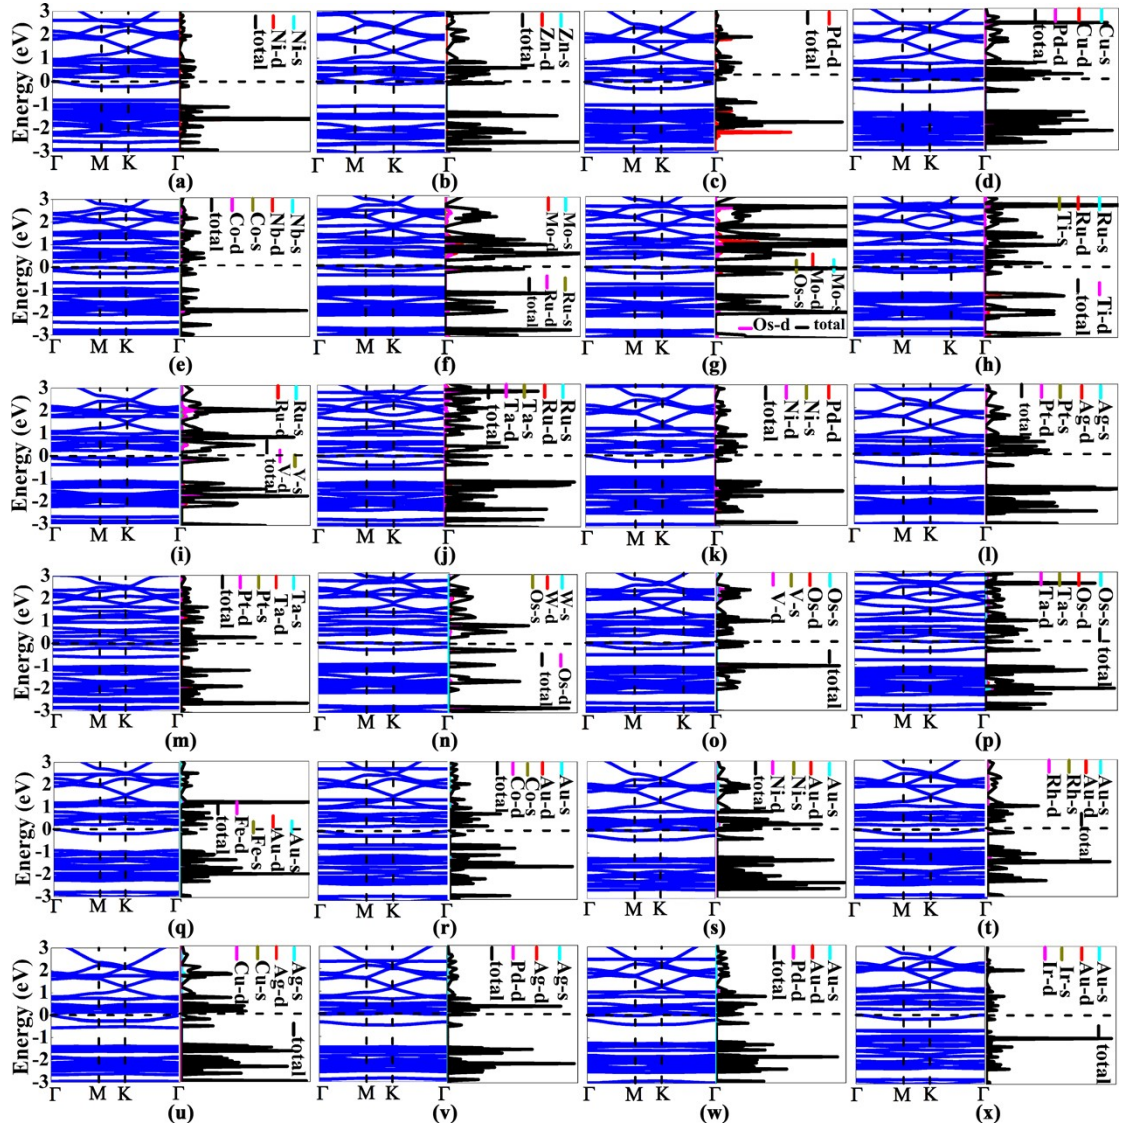

**Fig. S12.** The band structures and DOS for (a)  $\text{Ni}_2/\text{g-CN}$ , (b)  $\text{Zn}_2/\text{g-CN}$ , (c)  $\text{Pd}_2/\text{g-CN}$ , (d)  $\text{CuPd}/\text{g-CN}$ , (e)  $\text{NbCo}/\text{g-CN}$ , (f)  $\text{MoRu}/\text{g-CN}$ , (g)  $\text{MoOs}/\text{g-CN}$ , (h)  $\text{RuTi}/\text{g-CN}$ , (i)  $\text{RuV}/\text{g-CN}$ , (j)  $\text{RuTa}/\text{g-CN}$ , (k)  $\text{PdNi}/\text{g-CN}$ , (l)  $\text{AgPt}/\text{g-CN}$ , (m)  $\text{TaPt}/\text{g-CN}$ , (n)  $\text{WOs}/\text{g-CN}$ , (o)  $\text{OsV}/\text{g-CN}$ , (p)  $\text{OsTa}/\text{g-CN}$ , (q)  $\text{AuFe}/\text{g-CN}$ , (r)  $\text{AuCo}/\text{g-CN}$ , (s)  $\text{AuNi}/\text{g-CN}$ , (t)  $\text{AuRh}/\text{g-CN}$ , (u)  $\text{AgCu}/\text{g-CN}$ , (v)  $\text{AgPd}/\text{g-CN}$ , (w)  $\text{AuPd}/\text{g-CN}$ , and (x)  $\text{AuIr}/\text{g-CN}$ .

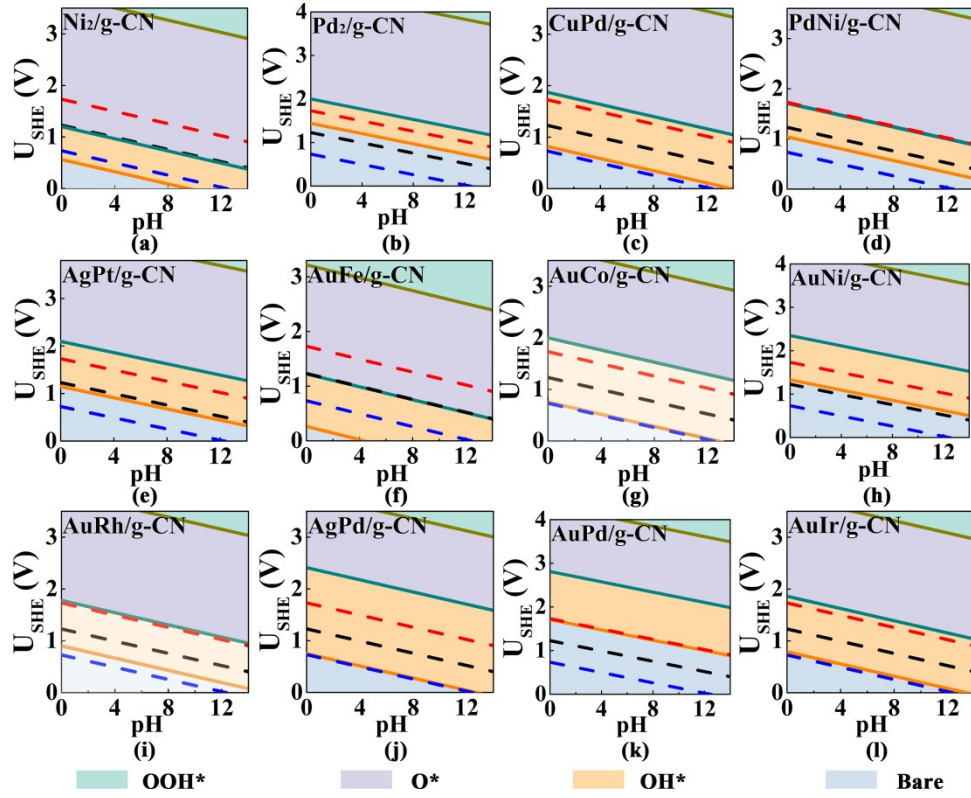

**Fig. S13.** The surface pourbaix diagrams of (a) Ni<sub>2</sub>/g-CN, (b) Pd<sub>2</sub>/g-CN, (c) CuPd/g-CN, (d) PdNi/g-CN, (e) AgPt/g-CN, (f) AuFe/g-CN, (g) AuCo/g-CN, (h) AuNi/g-CN, (i) AuRh/g-CN, (j) AgPd/g-CN, (k) AuPd/g-CN, and (l) AuIr/g-CN. The black dashed lines represent the HER/OER/ORR at equilibrium ( $U_{eq} = 1.23 V - 0.059 pH$ ). The red and blue dashed lines denote the oxidizing state for OER and ORR, respectively at an overpotential 0.5 V. The other solid lines represent the phase boundary of two oxidizing states.

## References

- 1 S. Grimme, J. Antony, S. Ehrlich, and H. Krieg, *J. Chem. Phys.*, 2010, **132**, 154104.
- 2 A. M. Patel, S. Ringe, S. Siahrostami, M. Bajdich, J. K. Nørskov, and A. R. Kulkarni, *J. Phys. Chem. C*, 2018, **122**, 29307-29318.
- 3 Y. Ying, K. Fan, X. Luo, and H. Huang, *J. Mater. Chem. A*, 2019, **7**, 11444-11451.
- 4 Y. Cui, L. Peng, L. Sun, Q. Qian, and T. Huang, *J. Mater. Chem. A*, 2018, **6**, 22768-22777.
- 5 J. K. Nørskov, T. Bligaard, A. Logadottir, J. Kitchin, J. G. Chen, S. Pandelov, and U. Stimming, *J. Am. Chem. Soc.*, 2005, **127**, 123.
- 6 J. Rossmeisl, Z.-W. Qu, H. Zhu, G.-J. Kroes, and J. K. Nørskov, *J. Electroanal. Chem.*, 2007, **607**, 83-89.
- 7 J. K. Nørskov, J. Rossmeisl, A. Logadottir, L. Lindqvist, J. R. Kitchin, T. Bligaard, and H. Jonsson, *J. Phys. Chem. B*, 2004, **108**, 17886-17892.
- 8 V. Wang, N. Xu, J C Liu, G. Tang, and W. T. Geng, *Comput. Phys. Commun.*, 2021, **267**, 108033.
- 9 C. Ling, X. Niu, Q. Li, A. Du, and J. Wang, *J. Am. Chem. Soc.*, 2018, **140**, 14161-14168.
- 10 P. Roy, A. Pramanik, and P. Sarkar, *J. Phys. Chem. Lett.*, 2021, **12**, 10837-10844.
- 11 F. Calle-Vallejo, J. I. Martínez, and J. Rossmeisl, *Phys.Chem.Chem.Phys.*, 2011, **13**, 15639-15643.
- 12 X. Guo, S. Lin, J. Gu, S. Zhang, Z. Chen, and S. Huang, *ACS Catal.*, 2019, **9**, 11042-11054.
- 13 N. Govindarajan, A. Xu, K. Science, 2022, **375**, 379-380.
- 14 D. A. Kitchaev, G. Ceder, *Nat. Commun.*, 2016, **7**, 1-7.
- 15 G. A. Kamat, J. A. Zamora Zeledón, G. T. Gunasooriya, S. M. Dull, J. T. Perryman, J. K. Nørskov, M. B. Stevens, and T. F. Jaramillo, *Commun. Chem.*, 2022, **5**, 1-10.
- 16 K. Holst Olesen, M. Reda, H. A. Hansen, V. Tejs, and A. Matthias, *ACS Catal.*, 2018, **8**, 7104-7112.

17 G. Henkelman, B. P. Uberuaga, and H. Jónsson, *J. Chem. Phys.*, 2000, **113**, 9901-9904.
